# Supplementary material for: Spatial-temporal variability of Mytilus galloprovincialis Lamarck 1819 populations and their accumulated sediment in northern Portugal
Source: PeerJ journal article supplement (doi:10.7717/peerj.11499), 2021-06-22

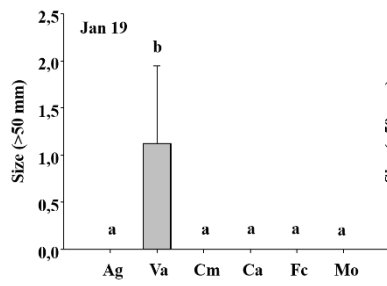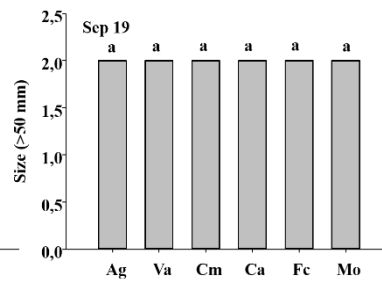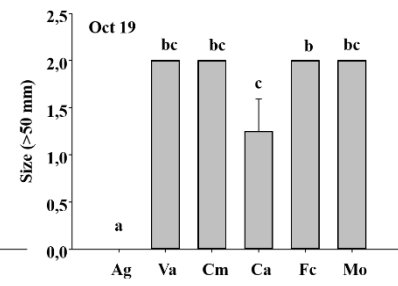

Supplement: FS4.pdf [file FS4.pdf]
