# Supplementary material for: Spatial-temporal variability of Mytilus galloprovincialis Lamarck 1819 populations and their accumulated sediment in northern Portugal
Source: PeerJ. 2021 Jun 22;9:e11499. doi: 10.7717/peerj.11499 (PMC8231337; doi:10.7717/peerj.11499)
Supplement: Supplemental Information 5 [file peerj-09-11499-s005.xlsx]

## Sheet: %Cover,Density,Spat,Sediment(g)
Code	Percentage of Cover (%)	Density	Spat density	63 μm	125 μm	250 μm	500 μm	1000 μm	Total Sediment (g)
JaAg11	72	802	257	0.8978	18.1626	10.5148	24.6627	46.6032	100.841
JaAg12	81	428	72	0.7893	13.4742	14.5254	26.5566	172.536	227.881
JaAg13	78	1056	440	0.1526	0.2786	0.2684	0.7878	11.7953	13.2827
JaAg14	75	974	356	0.1558	0.503	0.3804	1.0493	21.6654	23.7539
JaAg21	65	1217	515	0.2943	0.69	0.7572	1.6394	38.7445	42.1254
JaAg22	72	1387	440	1.1859	7.3415	4.8933	17.4722	62.9473	93.8402
JaAg23	73	1314	436	0.7375	2.3243	2.0288	3.4127	23.2108	31.7141
JaAg24	75	1309	372	0.1717	0.3884	0.3178	0.8013	20.3431	22.0223
JaVa11	49	553	112	1.2129	10.1485	9.711	86.0078	77.9683	185.048
JaVa12	38	249	49	0.3724	0.757	3.0668	13.4061	12.8933	30.4956
JaVa13	57	432	90	1.6264	2.8846	12.7945	38.508	142.674	198.488
JaVa14	52	749	192	0.5378	0.7113	1.8343	4.0444	13.0773	20.2051
JaVa21	84	456	113	1.3033	1.4678	6.9897	29.4968	13.373	52.6306
JaVa22	78	210	52	0.061	0.1041	1.192	2.4479	14.8372	18.6422
JaVa23	57	222	61	0.2667	0.3697	0.4855	7.0853	22.2834	30.4906
JaVa24	61	678	164	1.0544	1.3884	3.9128	28.2767	28.1966	62.8289
JaCm11	72	214	48	0.0809	0.1632	0.4163	0.5788	20.8541	22.0933
JaCm12	73	525	278	0.0215	0.1749	0.4618	0.6872	31.4181	32.7635
JaCm13	70	768	317	0.1564	2.404	9.297	22.3713	90.4698	124.699
JaCm14	69	819	425	0.5866	5.3804	8.9815	43.2367	130.083	188.269
JaCm21	78	1358	755	0.3804	3.7289	15.3677	16.1028	97.2112	132.791
JaCm22	68	1318	721	0.7049	5.5386	13.4656	18.6317	111.916	150.257
JaCm23	84	1007	463	1.2256	4.9232	17.5886	36.6458	118.308	178.691
JaCm24	77	777	340	0.1215	1.1536	4.1654	4.752	96.0904	106.283
JaMo11	79	1576	516	0.7691	2.613	15.4929	15.5131	26.7839	61.172
JaMo12	74	1148	288	1.3705	4.5412	28.5814	38.976	35.1044	108.573
JaMo13	75	2299	469	0.5909	1.9461	12.1931	21.6477	29.223	65.6008
JaMo14	69	494	135	0.0114	0.0316	0.1484	0.1916	2.7578	3.1408
JaMo21	63	2135	481	0.0815	0.3467	4.6097	3.172	6.9396	15.1495
JaMo22	80	794	123	0.027	0.1046	0.5531	0.3214	2.921	3.9271
JaMo23	98	509	33	0.0088	0.0304	0.1532	0.1417	2.4201	2.7542
JaMo24	95	634	86	0.0218	0.0403	0.2478	0.1528	4.1382	4.6009
JaFo11	50	635	89	0.0057	0.0146	0.0346	0.1699	4.463	4.6878
JaFo12	38	1052	268	0.0729	0.3366	1.0093	2.5458	11.1795	15.1441
JaFo13	64	1348	220	0.158	0.4949	1.1073	3.0921	21.2664	26.1187
JaFo14	47	1608	415	0.0309	0.1553	0.3667	2.0714	23.4847	26.109
JaFo21	53	754	111	0.0101	0.0232	0.0621	0.2923	17.4425	17.8302
JaFo22	67	2018	661	0.8535	4.4864	8.8044	24.3748	112.645	151.164
JaFo23	54	1303	280	0.042	0.104	0.1778	0.7148	22.3106	23.3492
JaFo24	40	1653	624	0.6784	3.7648	7.3356	8.4448	43.3969	63.6205
JaCa11	50	1440	682	0.4615	1.8252	15.0998	32.903	24.4255	74.715
JaCa12	50	2016	830	1.5172	3.1236	15.2188	59.4769	39.4603	118.797
JaCa13	48	3400	1369	0.9455	2.6469	14.1934	20.995	55.2136	93.9944
JaCa14	50	1137	388	0.4515	0.8966	7.2383	15.3785	30.0179	53.9828
JaCa21	48	939	175	1.8304	2.8264	10.2771	57.2401	62.4683	134.642
JaCa22	65	1672	746	0.1699	0.8426	7.3195	5.254	21.3224	34.9084
JaCa23	69	619	146	1.748	4.0955	20.2086	67.2558	94.0298	187.338
JaCa24	54	1042	537	2.2627	3.0798	19.7789	198.45	80.8971	304.468
									0
AbAg11	51	400	114	0.6036	1.3808	1.3298	7.475	33.9643	44.7535
AbAg12	61	1054	209	0.1227	0.1513	0.197	0.4387	44.3008	45.2105
AbAg13	55	1326	651	0.088	0.1799	0.1711	0.7405	19.9249	21.1044
AbAg14	58	568	114	0.3284	0.5435	0.6868	2.3144	29.427	33.3001
AbAg21	52	468	71	2.6765	18.6653	17.6841	25.0426	119.207	183.275
AbAg22	62	442	80	0.0769	0.1284	0.1552	0.5564	36.9733	37.8902
AbAg23	66	443	124	0.103	0.09	0.0902	0.3556	51.3038	51.9426
AbAg24	39	501	205	0.398	0.9189	0.78	1.9447	40.209	44.2506
AbVa11	65	869	221	0.7744	0.6726	2.6875	19.087	19.7318	42.9533
AbVa12	55	728	244	2.1018	2.1477	5.4031	29.3958	28.3932	67.4416
AbVa13	56	649	211	1.3862	4.2514	10.1311	34.7517	46.8657	97.3861
AbVa14	79	769	203	2.0276	1.5401	5.5866	52.2258	88.1806	149.561
AbVa21	31	629	114	0.0598	0.0919	0.9333	1.9021	4.2663	7.2534
AbVa22	38	856	386	1.6199	1.7314	15.246	16.4149	10.6125	45.6247
AbVa23	52	447	95	0.7334	1.0166	8.8591	32.698	33.199	76.5061
AbVa24	69	627	220	1.7743	1.9334	15.7272	100.874	43.3633	163.672
AbCm11	83	542	166	0.3013	3.311	15.3873	15.0744	177.613	211.688
AbCm12	71	974	249	0.2347	4.0714	20.5726	9.9361	93.5087	128.324
AbCm13	87	693	178	0.0341	0.4148	2.2744	1.0094	44.4272	48.1599
AbCm14	62	852	337	0.4301	4.2933	17.1111	11.8701	81.7554	115.46
AbCm21	92	101	16	0.0032	0.015	0.07	0.0529	12.8366	12.9777
AbCm22	73	1005	355	0.02	0.1082	1.3686	0.7962	56.8899	59.1829
AbCm23	77	839	177	0.0342	0.2223	1.0362	0.09764	22.498	23.8883
AbCm24	63	1228	432	0.0449	0.4371	2.837	1.5733	58.0033	62.8956
AbMo11	66	720	105	0.063	0.1576	0.5457	0.793	10.3643	11.9236
AbMo12	68	177	16	0.0216	0.0385	0.0857	0.1934	38.305	38.6442
AbMo13	58	1187	258	1.5104	3.5744	14.9096	35.0724	82.2433	137.31
AbMo14	72	937	268	4.8587	9.8104	26.6445	52.7019	104.929	198.945
AbMo21	58	722	245	4.1536	7.7754	22.5847	45.3551	154.702	234.57
AbMo22	66	458	143	1.5099	5.0851	15.6557	44.9143	79.0874	146.252
AbMo23	62	383	76	3.8565	6.8411	19.7548	24.1218	67.3322	121.906
AbMo24	69	399	170	2.83	7.0675	26.0273	62.0425	127.252	225.219
AbFo11	55	552	117	0.007	0.0151	0.044	0.5929	8.3661	9.0251
AbFo12	38	357	86	0.0186	0.1191	0.2817	1.9741	6.8615	9.255
AbFo13	40	1896	502	0.1665	0.9074	1.4983	14.253	33.685	50.5102
AbFo14	49	217	41	0.0101	0.0635	0.1169	0.5955	4.6412	5.4272
AbFo21	74	3179	985	0.1668	0.8098	0.9455	3.1085	24.186	29.2166
AbFo22	88	1535	455	0.0638	0.2062	0.2729	0.9016	8.9902	10.4347
AbFo23	66	541	65	0.0052	0.0161	0.0356	0.1074	1.6819	1.8462
AbFo24	56	233	46	0.004	0.0155	0.0396	0.0735	1.4698	1.6024
AbCa11	34	438	57	0.576	1.5639	13.0636	27.3543	31.5635	74.1213
AbCa12	26	269	58	1.3475	5.975	24.5718	24.6085	31.8141	88.3169
AbCa13	42	245	50	3.8565	5.7636	38.4355	41.1736	94.9315	184.161
AbCa14	55	232	39	2.4014	4.9044	25.5717	31.4279	55.7194	120.025
AbCa21	49	958	160	0.2428	0.7867	3.4834	9.2105	29.0777	42.8011
AbCa22	44	1523	308	1.7697	4.1553	53.8006	77.2797	77.6737	214.679
AbCa23	31	1015	208	0.9813	3.0021	27.0071	28.3562	32.9747	92.3214
AbCa24	44	893	243	3.4122	5.095	70.713	128.409	132.489	340.118
									0
JuAg11	62	677	306	0.0148	0.022	0.0507	0.0975	5.0059	5.1909
JuAg12	51	709	331	0.0085	0.099	0.0226	0.0669	3.6764	3.8734
JuAg13	53	962	492	0.0421	0.0387	0.0796	0.2279	10.0219	10.4102
JuAg14	57	1564	780	0.1301	0.1158	0.1671	0.6961	18.0654	19.1745
JuAg21	49	503	209	0.0393	0.0545	0.1625	0.4009	6.6825	7.3397
JuAg22	62	1219	535	0.0425	0.0431	0.0863	0.2951	11.379	11.846
JuAg23	65	2085	1125	1.1859	6.8067	2.2665	4.8886	37.4425	52.5902
JuAg24	63	2411	1421	0.7268	5.8239	1.5827	5.8731	50.9029	64.9094
JuVa11	51	3687	2107	1.1616	1.7359	1.2239	7.6599	24.8342	36.6155
JuVa12	60	2835	1589	0.4483	0.6437	0.47792	3.9775	18.015	23.5624
JuVa13	69	2239	1237	0.245	0.3134	0.3302	3.472	9.6904	14.051
JuVa14	60	2192	1001	0.6571	0.6673	0.5485	4.8939	10.6161	17.3829
JuVa21	54	2796	1645	0.2751	0.3025	0.2788	1.1593	25.1976	27.2133
JuVa22	38	1900	1135	0.1635	0.2058	0.2583	1.0753	8.4538	10.1567
JuVa23	42	2815	1401	0.2486	0.3067	0.4104	1.3232	29.404	31.6929
JuVa24	45	2790	1540	0.326	1.045	1.0074	1.5571	34.2741	38.2096
JuCm11	45	548	241	0.0125	0.0973	0.1046	0.1491	12.2924	12.6559
JuCm12	70	1301	595	0.502	6.439	9.7096	3.3623	29.608	49.6209
JuCm13	97	1093	442	0.0848	2.3457	1.1314	0.5496	30.1048	34.2163
JuCm14	53	711	296	0.0214	0.2765	0.2489	0.2428	16.9349	17.7245
JuCm21	36	2318	893	0.1846	5.5127	4.6361	3.4434	25.0128	38.7896
JuCm22	65	2580	1164	0.5556	14.8744	27.3784	7.9072	55.3939	106.109
JuCm23	65	3473	1633	0.41	11.4258	29.1225	6.0524	84.1119	131.123
JuCm24	43	3409	1290	0.5651	8.5292	21.0797	7.3337	101.119	138.627
JuMo11	56	1834	968	0.5978	1.7755	7.7493	20.8191	80.3477	111.289
JuMo12	60	1415	767	0.5735	1.4196	5.6841	7.0183	39.379	54.0745
JuMo13	58	1291	764	0.2106	0.3393	1.3046	2.2704	48.229	52.3539
JuMo14	76	808	256	0.4831	0.7145	3.0027	2.9955	27.9613	35.1571
JuMo21	58	1377	795	0.4559	0.8504	4.617	7.5498	38.3891	51.8622
JuMo22	66	2829	1852	0.5693	0.8426	4.9741	17.7	45.9741	70.0601
JuMo23	59	1442	841	0.2448	0.4483	2.4782	6.2917	24.1623	33.6253
JuMo24	89	1923	1125	0.183	0.3495	1.6622	5.1331	21.6433	28.9711
JuFo11	47	586	247	0.0094	0.0214	0.078	0.0769	2.0002	2.1859
JuFo12	56	729	417	0.0108	0.0316	0.0689	0.0805	1.8428	2.0346
JuFo13	54	586	323	0.0042	0.0153	0.0395	0.0529	1.3805	1.4924
JuFo14	57	849	374	0.0058	0.0346	0.0524	0.0869	2.8755	3.0552
JuFo21	64	1658	959	0.0338	0.2323	0.3067	0.2082	10.9817	11.7627
JuFo22	70	2679	1189	0.0842	0.5381	0.928	0.6547	9.2535	11.4585
JuFo23	65	2339	1224	0.1334	0.7437	0.9025	0.7186	8.9632	11.4614
JuFo24	94	3449	2262	0.1525	1.3728	1.764	0.7834	26.0976	30.1703
JuCa11	38	1537	948	0.732	1.532	4.2028	3.2587	26.634	36.3595
JuCa12	41	758	394	2.4446	3.7782	14.5362	54.7966	42.4526	118.008
JuCa13	42	895	394	0.7666	1.3274	2.9991	2.5992	39.6218	47.3141
JuCa14	49	535	312	2.7237	7.1632	17.6504	41.6095	30.253	99.3998
JuCa21	53	1739	1010	1.6533	5.8557	18.0781	31.6959	71.9718	129.255
JuCa22	58	602	209	0.6644	0.7126	1.5275	1.3567	34.1895	38.4507
JuCa23	59	551	233	0.4691	0.7048	2.1951	1.7249	29.9203	35.0142
JuCa24	66	527	256	3.2272	7.1686	47.9632	62.8937	77.8091	199.062
									0
SeAg11	53	2103	1262	0.8968	9.5078	8.501	12.1722	33.2371	64.3149
SeAg12	55	618	302	4.1724	17.3361	38.9153	34.213	102.897	197.533
SeAg13	54	1522	925	0.8896	5.3398	3.2746	6.3264	37.3405	53.1709
SeAg14	73	815	335	2.6519	11.3969	19.7196	18.105	48.913	100.786
SeAg21	78	1196	589	0.6982	5.9544	1.2331	2.3693	39.9328	50.1878
SeAg22	83	1400	733	0.5332	0.9333	0.5604	1.1916	27.6206	30.8391
SeAg23	73	1523	755	0.2746	0.2956	0.2859	0.8766	12.0925	13.8252
SeAg24	62	1566	772	0.43	0.2741	0.2439	0.5176	15.1173	16.5829
SeVa11	75	4722	1669	2.6826	9.6827	23.6605	14.0175	58.0512	108.095
SeVa12	46	3234	1415	1.587	2.8928	1.4137	2.627	23.7163	32.2368
SeVa13	57	4020	1734	0.7766	3.5025	1.1219	1.9677	37.0875	44.4562
SeVa14	62	4970	2804	0.7762	3.9107	1.6506	4.7664	26.4052	37.5091
SeVa21	64	4824	2584	1.5307	10.5263	5.0039	2.8474	17.9498	37.8581
SeVa22	52	5370	1915	0.6951	3.4407	1.4902	1.0973	14.6326	21.3559
SeVa23	69	5334	2863	2.06	11.0559	6.9068	2.5762	15.1495	37.7484
SeVa24	64	8791	3361	4.2512	13.1693	16.9603	4.5136	46.8769	85.7713
SeCm11	78	1278	494	1.9859	14.7718	50.3534	38.4007	143.732	249.243
SeCm12	57	907	340	0.6573	7.9095	31.6039	15.7778	39.6868	95.6353
SeCm13	65	1544	807	0.65	5.0244	13.1038	6.5953	22.468	47.8415
SeCm14	83	2533	1399	0.1004	0.5653	1.2494	1.4962	25.45	28.8613
SeCm21	71	1667	865	0.6705	7.0275	23.9723	27.3855	74.3435	133.399
SeCm22	81	1513	936	0.8991	9.7081	45.329	35.0757	74.556	165.568
SeCm23	30	1469	690	0.4168	3.5997	12.4807	21.9726	65.2735	103.743
SeCm24	65	2026	973	1.0189	12.2985	50.4421	20.171	80.8564	164.787
SeMo11	68	2481	1005	0.7213	1.6523	9.8949	28.6062	55.6399	96.5146
SeMo12	63	2336	974	0.208	0.3423	1.8108	3.9146	19.0714	25.3471
SeMo13	60	1697	816	0.0965	0.149	0.5237	1.1114	21.8578	23.7384
SeMo14	70	1752	616	0.0579	0.0991	0.4497	0.9935	26.4633	28.0635
SeMo21	63	378	124	0.0039	0.0111	0.0272	0.0783	3.6451	3.7656
SeMo22	60	2079	745	0.0487	0.072	0.2119	0.915	37.4182	38.6658
SeMo23	49	3267	1413	0.3463	0.622	2.7736	13.3063	39.456	56.5042
SeMo24	68	1982	623	0.1497	0.2913	1.4243	4.358	15.9343	22.1576
SeFo11	70	1967	773	0.2695	0.352	0.4335	0.7633	10.4316	12.2499
SeFo12	80	1998	1035	0.1304	0.3313	0.4663	0.6263	6.5827	8.137
SeFo13	59	936	395	0.0093	0.0164	0.0478	0.068	0.068	0.2095
SeFo14	72	1094	501	0.0119	0.0239	0.0698	0.0822	5.1782	5.366
SeFo21	34	2537	1379	0.3948	1.6427	1.8432	2.7577	22.8029	29.4413
SeFo22	35	3459	2141	1.8151	4.0528	25.0176	14.8719	43.9637	89.7211
SeFo23	33	1680	914	0.3942	1.6708	1.6937	2.908	18.2358	24.9025
SeFo24	51	1771	911	0.3914	1.0125	0.8808	1.4955	13.733	17.5132
SeCa11	66	1230	585	3.0636	2.0363	28.6924	22.1368	47.8072	103.736
SeCa12	56	1246	461	5.146	4.2677	22.3101	24.0573	62.2863	118.067
SeCa13	67	738	269	3.2594	7.8058	35.7115	10.8097	18.2886	75.875
SeCa14	74	1319	800	6.783	11.3679	78.4607	36.7589	75.3855	208.756
SeCa21	64	1763	827	2.5861	3.8692	36.2785	28.7145	42.8438	114.292
SeCa22	70	1495	635	2.8783	4.9118	30.016	19.8545	23.2365	80.8971
SeCa23	51	1204	449	0.1533	0.2845	1.7049	1.0413	9.147	12.331
SeCa24	66	1530	525	0.3	0.6244	2.3719	1.1714	33.547	38.0147
									0
OuAg11	45	538	183	0.0201	0.0542	0.0989	0.6177	3.3701	4.161
OuAg12	53	1478	721	0.2867	0.6412	1.1531	8.3539	9.386	19.8209
OuAg13	52	1059	264	0.1485	0.253	0.54	1.6681	6.2373	8.8469
OuAg14	58	1112	273	0.0545	0.1099	0.2063	1.7879	13.2392	15.3978
OuAg21	50	330	52	1.644	12.549	10.5021	61.3895	97.9641	184.049
OuAg22	59	334	36	0.9791	2.1524	3.2329	45.0972	97.1939	148.656
OuAg23	49	518	122	0.7369	6.1744	3.7011	25.1369	62.6308	98.3801
OuAg24	35	134	13	1.4497	5.0121	2.9228	25.6705	72.3942	107.449
OuVa11	43	3534	997	3.4892	10.0789	13.2809	4.5825	86.5051	117.937
OuVa12	32	3283	1503	0.5746	2.536	2.1256	10.3961	42.8715	58.5038
OuVa13	40	2617	950	0.8766	3.6986	2.4481	6.051	12.6533	25.7276
OuVa14	36	3248	1242	1.7481	12.4538	29.5276	23.5116	54.7063	121.947
OuVa21	47	4313	1591	0.7896	1.7869	1.6315	3.305	15.1449	22.6579
OuVa22	46	5629	1933	1.1843	3.5082	3.928	7.8177	29.5538	45.992
OuVa23	63	3345	1095	2.9885	9.1932	10.216	8.9629	13.6044	44.965
OuVa24	39	4014	1555	0.861	12.1907	15.9678	11.3744	35.3041	75.698
OuCm11	61	2959	1240	0.1335	1.6835	4.1008	3.9623	15.148	25.0281
OuCm12	56	1695	572	0.1226	2.0749	4.218	3.3284	23.3505	33.0944
OuCm13	60	2994	1415	0.1247	1.7642	6.003	4.7531	29.4305	42.0755
OuCm14	56	2862	1333	0.0362	1.0135	5.4063	4.823	34.8123	46.0913
OuCm21	52	2034	726	0.0856	2.4643	5.5514	3.9916	18.3423	30.4352
OuCm22	53	2928	1163	0.078	1.4465	4.4751	4.0789	23.9218	34.0003
OuCm23	60	2299	595	0.1147	1.4014	3.6294	3.9544	12.3805	21.4804
OuCm24	40	3704	1431	0.0577	0.9228	2.1657	3.4859	17.2935	23.9256
OuMo11	46	1551	664	3.2609	5.7306	15.6846	52.5406	98.701	175.918
OuMo12	46	570	151	3.0555	6.3406	32.0917	40.0153	50.8918	132.395
OuMo13	39	1126	448	3.9115	9.038	39.7748	40.9516	88.1267	181.803
OuMo14	57	259	93	2.1955	5.2065	24.0377	47.7351	87.7308	166.906
OuMo21	83	2571	1287	2.5778	11.329	28.284	34.7242	61.0101	137.925
OuMo22	84	1796	687	0.9513	3.7215	8.3041	12.923	27.5166	53.4165
OuMo23	50	1001	461	0.1013	0.3512	0.8163	2.2313	26.5324	30.0325
OuMo24	40	1739	935	2.1992	6.6705	22.9455	44.366	55.1234	131.305
OuFo11	47	1934	964	0.019	0.1316	0.1749	0.2626	3.0403	3.6284
OuFo12	54	3464	1364	0.16	1.0354	0.9856	0.8226	14.3089	17.3125
OuFo13	41	3108	1169	0.2019	1.6837	1.5572	0.9672	8.7895	13.1995
OuFo14	38	2626	824	0.3102	2.94	3.6978	2.076	21.5506	30.5746
OuFo21	48	1289	386	0.0269	0.1247	0.1222	0.1786	3.4443	3.8967
OuFo22	49	2273	760	0.0555	0.2338	0.2517	0.3042	2.831	3.6762
OuFo23	53	1853	811	0.0814	0.4033	0.3318	0.3063	11.3799	12.5027
OuFo24	45	903	286	0.0221	0.1089	0.1068	0.1628	4.0817	4.4823
OuCa11	67	5418	2938	0.8249	4.3438	11.2502	12.442	43.6177	72.4786
OuCa12	46	1678	752	0.7311	4.4481	10.8924	56.9003	81.3526	154.325
OuCa13	30	796	341	0.3827	3.5817	11.4986	17.268	24.2466	56.9776
OuCa14	46	1499	646	0.2427	1.6727	5.8776	6.9993	33.9485	48.7408
OuCa21	48	1936	1154	1.3758	7.5348	9.0591	36.0386	33.7888	87.7971
OuCa22	66	990	438	8.4331	19.5968	63.8514	93.1138	63.2799	248.275
OuCa23	44	2869	1181	0.3198	0.9764	1.6677	4.9113	20.0293	27.9045
OuCa24	45	1919	1053	0.6128	3.068	4.0114	7.9816	23.0139	38.6877
									0
DezAg11	41	519	81	0.0563	0.1014	0.2271	0.6845	38.6	39.6693
DezAg12	49	1036	377	0.1636	0.5718	0.4063	2.6942	21.1898	25.0257
DezAg13	43	682	240	0.214	0.438	0.5498	2.0456	11.7445	14.9919
DezAg14	37	1291	501	1.2239	1.3118	0.4384	3.4877	20.9607	27.4225
DezAg21	42	135	29	1.4162	2.5855	3.2954	14.9519	142.594	164.843
DezAg22	34	184	17	2.4142	9.0041	5.6756	16.9855	59.3834	93.4628
DezAg23	77	142	16	3.0812	11.7857	16.8376	38.2771	151.793	221.774
DezAg24	27	168	27	0.6818	7.1398	9.1764	23.4736	74.2695	114.741
DezVa11	38	4425	1334	0.7774	6.7505	6.9938	13.5981	51.1446	79.2644
DezVa12	44	3688	1542	0.7763	1.8243	2.0425	7.8943	33.7932	46.3306
DezVa13	59	3771	1640	1.1399	1.55	1.9427	9.1092	47.423	61.1648
DezVa14	31	1426	404	1.0661	4.7191	5.9158	13.0276	53.057	77.7856
DezVa21	51	2074	613	5.0277	9.8871	21.3194	46.6306	89.7331	172.598
DezVa22	55	2853	1248	3.5803	3.4022	16.3729	14.4553	49.233	87.0437
DezVa23	35	1659	840	0.0995	0.1393	0.2666	1.4597	11.673	13.6381
DezVa24	50	3245	1178	2.7183	6.8368	6.4186	11.4119	37.0447	64.4303
DezCm11	45	950	395	0.6929	5.2691	9.7636	5.8276	40.7769	62.3301
DezCm12	42	288	85	0.0652	0.9048	2.0273	1.6619	29.211	33.8702
DezCm13	37	934	306	0.39	3.7293	4.5345	3.5724	23.8003	36.0265
DezCm14	33	836	227	1.7035	5.5834	17.4347	9.3833	48.1121	82.217
DezCm21	47	1063	381	1.8521	6.5659	37.8098	13.7291	79.5364	139.493
DezCm22	40	989	269	0.862	3.5843	11.7403	9.0612	73.0813	98.3291
DezCm23	47	790	237	0.4394	5.5236	10.8632	7.6456	43.0106	67.4824
DezCm24	44	506	173	1.3485	8.6148	13.3471	7.9676	41.798	73.076
DezMo11	68	1775	836	1.7056	3.694	10.18	18.0925	53.7381	87.4102
DezMo12	57	1241	604	1.4306	5.1581	10.693	11.0196	49.5638	77.8651
DezMo13	66	2051	899	1.2945	7.603	17.1653	33.4264	66.9567	126.446
DezMo14	63	1525	571	0.985	4.6191	12.207	13.4616	53.2324	84.5051
DezMo21	64	1745	893	0.8597	3.0466	5.5859	5.1972	34.525	49.2144
DezMo22	54	1987	783	1.3617	4.7912	12.5063	16.0915	67.52	102.271
DezMo23	72	1859	1046	1.5618	3.9174	9.4127	13.0273	49.3959	77.3151
DezMo24	75	2739	1471	0.652	7.5051	15.1158	11.6125	44.1724	79.0578
DezFo11	63	434	67	0.015	0.0302	0.0839	0.1339	6.9559	7.2189
DezFo12	72	3449	2105	0.6829	2.6281	3.5499	3.7483	26.6867	37.2959
DezFo13	54	1700	558	0.0704	0.1403	0.3308	0.6782	9.6128	10.8325
DezFo14	65	2617	1528	0.2834	0.8259	1.0259	1.5874	22.9618	26.6844
DezFo21	46	1050	399	0.0241	0.064	0.1581	0.4439	7.074	7.7641
DezFo22	58	2101	1117	0.3217	2.6703	5.2322	2.4268	28.8938	39.5448
DezFo23	57	1978	1036	0.1407	0.7993	1.2282	1.3493	12.9421	16.4596
DezFo24	58	1136	567	2.44	9.8194	33.6925	24.0374	87.6233	157.613
DezCa11	48	1786	711	0.2148	1.1227	4.7563	2.1532	11.0095	19.2565
DezCa12	56	1563	679	0.083	0.2579	1.1413	0.9953	6.5425	9.02
DezCa13	49	1311	528	0.0322	0.12	0.4981	0.4657	5.7486	6.8646
DezCa14	52	2238	977	0.3809	1.0658	3.1418	1.6524	15.1205	21.3614
DezCa21	63	1160	727	0.8563	3.1927	17.0441	10.8946	36.6878	68.6755
DezCa22	62	1111	456	0.3821	1.2986	13.8574	7.8054	19.77	43.1135
DezCa23	42	1670	838	0.9897	2.9282	13.5949	10.3725	15.2367	43.122
DezCa24	46	2335	1192	2.7966	5.3789	30.7891	41.7546	47.3365	128.056
									0
									0

## Sheet: Sizes classes (cm)
Code	Size (cm)
JaAg11	2.5
JaAg11	2.3
JaAg11	2.3
JaAg11	1.5
JaAg11	2.3
JaAg11	2
JaAg11	1.7
JaAg11	1.8
JaAg11	1.4
JaAg11	2.4
JaAg11	1.8
JaAg11	1.3
JaAg11	1.1
JaAg11	2.5
JaAg11	1.8
JaAg11	1.2
JaAg11	0.9
JaAg11	2.2
JaAg11	1.8
JaAg11	1.9
JaAg12	1.8
JaAg12	2.9
JaAg12	2.9
JaAg12	3.6
JaAg12	2.6
JaAg12	3.7
JaAg12	4.4
JaAg12	1.6
JaAg12	1.8
JaAg12	2.5
JaAg12	2.1
JaAg12	2.6
JaAg12	1.2
JaAg12	3.1
JaAg12	1.1
JaAg12	3.6
JaAg12	2.3
JaAg12	1.9
JaAg12	1.8
JaAg12	1.1
JaAg13	2.1
JaAg13	3.5
JaAg13	1.3
JaAg13	1.3
JaAg13	2
JaAg13	1.8
JaAg13	1.6
JaAg13	2.1
JaAg13	1.7
JaAg13	1.2
JaAg13	2.1
JaAg13	1.5
JaAg13	2.4
JaAg13	1.4
JaAg13	2.3
JaAg13	2
JaAg13	1.4
JaAg13	1
JaAg13	0.9
JaAg13	1.1
JaAg14	2.3
JaAg14	4
JaAg14	2
JaAg14	2.5
JaAg14	1.6
JaAg14	1.8
JaAg14	3.4
JaAg14	2.3
JaAg14	2.3
JaAg14	1.1
JaAg14	2.2
JaAg14	2.4
JaAg14	2
JaAg14	2
JaAg14	2
JaAg14	3
JaAg14	1.6
JaAg14	1.8
JaAg14	1.7
JaAg14	1.6
JaAg21	2
JaAg21	3.6
JaAg21	2.3
JaAg21	2.6
JaAg21	2.5
JaAg21	2.3
JaAg21	2.7
JaAg21	2
JaAg21	1.7
JaAg21	2.7
JaAg21	1.5
JaAg21	1.4
JaAg21	2
JaAg21	2.2
JaAg21	1.6
JaAg21	2.1
JaAg21	1.6
JaAg21	2.3
JaAg21	2.2
JaAg21	1.9
JaAg22	2.7
JaAg22	1.9
JaAg22	3.2
JaAg22	3.9
JaAg22	2.2
JaAg22	4
JaAg22	2.5
JaAg22	1.4
JaAg22	2.2
JaAg22	2.5
JaAg22	1.7
JaAg22	1.1
JaAg22	1.9
JaAg22	1.3
JaAg22	1.2
JaAg22	1.1
JaAg22	1
JaAg22	2
JaAg22	1.6
JaAg22	1
JaAg23	1.7
JaAg23	2.8
JaAg23	2.3
JaAg23	2.8
JaAg23	2.4
JaAg23	2.3
JaAg23	2.3
JaAg23	2
JaAg23	2.7
JaAg23	2.3
JaAg23	2
JaAg23	2.8
JaAg23	2.7
JaAg23	1.6
JaAg23	1.2
JaAg23	1.7
JaAg23	1.2
JaAg23	1.4
JaAg23	1.2
JaAg23	1.3
JaAg24	3
JaAg24	3.9
JaAg24	3
JaAg24	1.4
JaAg24	2.3
JaAg24	1.4
JaAg24	2
JaAg24	2.1
JaAg24	2.2
JaAg24	1.1
JaAg24	2.6
JaAg24	2.6
JaAg24	2.7
JaAg24	2.6
JaAg24	1.5
JaAg24	2.7
JaAg24	1
JaAg24	1.1
JaAg24	1.5
JaAg24	1.2
JaVa11	2.9
JaVa11	2.5
JaVa11	2.2
JaVa11	3
JaVa11	3
JaVa11	3
JaVa11	2.7
JaVa11	2.2
JaVa11	1.8
JaVa11	1.7
JaVa11	1.3
JaVa11	1.5
JaVa11	1.9
JaVa11	1.5
JaVa11	1.1
JaVa11	1.4
JaVa11	1.1
JaVa11	0.8
JaVa11	1.2
JaVa11	2.3
JaVa12	3.4
JaVa12	4.1
JaVa12	4
JaVa12	3.5
JaVa12	4.5
JaVa12	3.3
JaVa12	3
JaVa12	3.2
JaVa12	3.7
JaVa12	3.4
JaVa12	2.7
JaVa12	2
JaVa12	2.8
JaVa12	2.3
JaVa12	2.1
JaVa12	1.6
JaVa12	1.2
JaVa12	1.5
JaVa12	1
JaVa12	0.9
JaVa13	3.8
JaVa13	3.8
JaVa13	3.6
JaVa13	3.4
JaVa13	4.1
JaVa13	2.6
JaVa13	4.2
JaVa13	3.2
JaVa13	2.9
JaVa13	1.4
JaVa13	1.4
JaVa13	4.3
JaVa13	2.1
JaVa13	2.3
JaVa13	1.8
JaVa13	3.3
JaVa13	2.2
JaVa13	1.7
JaVa13	1.5
JaVa13	1.3
JaVa14	2.1
JaVa14	3.2
JaVa14	3.9
JaVa14	3.1
JaVa14	1.6
JaVa14	1.6
JaVa14	1
JaVa14	1.7
JaVa14	1.6
JaVa14	0.8
JaVa14	1.7
JaVa14	1.6
JaVa14	1.5
JaVa14	1.3
JaVa14	1.1
JaVa14	1.2
JaVa14	1.8
JaVa14	1.4
JaVa14	0.6
JaVa14	0.8
JaVa21	1.5
JaVa21	2.3
JaVa21	2.5
JaVa21	2.7
JaVa21	3.3
JaVa21	2.9
JaVa21	2.3
JaVa21	2.2
JaVa21	3.2
JaVa21	2.2
JaVa21	1.2
JaVa21	1.8
JaVa21	2.8
JaVa21	1.7
JaVa21	2
JaVa21	1
JaVa21	2.5
JaVa21	1.7
JaVa21	1.3
JaVa21	1.7
JaVa22	5.7
JaVa22	5
JaVa22	4.5
JaVa22	5.4
JaVa22	4.2
JaVa22	3.9
JaVa22	5.2
JaVa22	4.8
JaVa22	5.8
JaVa22	4.9
JaVa22	3.5
JaVa22	4.5
JaVa22	5
JaVa22	4.7
JaVa22	5.1
JaVa22	2.5
JaVa22	1.9
JaVa22	2
JaVa22	1.8
JaVa22	2.4
JaVa23	3.3
JaVa23	5.1
JaVa23	4.8
JaVa23	5
JaVa23	4.1
JaVa23	3.3
JaVa23	2.7
JaVa23	3.3
JaVa23	3
JaVa23	3.3
JaVa23	4.1
JaVa23	3.1
JaVa23	2.9
JaVa23	2.8
JaVa23	2.4
JaVa23	3.6
JaVa23	1.4
JaVa23	1.7
JaVa23	0.9
JaVa23	0.9
JaVa24	2.8
JaVa24	4.8
JaVa24	4.7
JaVa24	4.1
JaVa24	3.7
JaVa24	2.6
JaVa24	3
JaVa24	3.6
JaVa24	2
JaVa24	2.1
JaVa24	2
JaVa24	2.5
JaVa24	1.9
JaVa24	1
JaVa24	1.9
JaVa24	1.7
JaVa24	1.3
JaVa24	1.9
JaVa24	1.6
JaVa24	1.1
JaCm11	3.4
JaCm11	3
JaCm11	3.8
JaCm11	3.7
JaCm11	1.6
JaCm11	3.9
JaCm11	1.4
JaCm11	1.5
JaCm11	2.1
JaCm11	2.7
JaCm11	3.2
JaCm11	1.7
JaCm11	3
JaCm11	1.2
JaCm11	3.9
JaCm11	2.6
JaCm11	1.1
JaCm11	2.7
JaCm11	3.3
JaCm11	2.1
JaCm12	1.5
JaCm12	1
JaCm12	1.5
JaCm12	2.8
JaCm12	3.3
JaCm12	2.7
JaCm12	2.3
JaCm12	1.9
JaCm12	3
JaCm12	3.1
JaCm12	2.5
JaCm12	1.7
JaCm12	2
JaCm12	1.7
JaCm12	2.9
JaCm12	2.9
JaCm12	1.6
JaCm12	3.2
JaCm12	2.8
JaCm12	1.4
JaCm13	2.8
JaCm13	3.2
JaCm13	3
JaCm13	1.7
JaCm13	2.3
JaCm13	3.5
JaCm13	2.7
JaCm13	2.8
JaCm13	2
JaCm13	3
JaCm13	2
JaCm13	1.5
JaCm13	1.2
JaCm13	2.2
JaCm13	2.6
JaCm13	1.6
JaCm13	2.7
JaCm13	3.1
JaCm13	2.7
JaCm13	1.7
JaCm14	2.5
JaCm14	3
JaCm14	2.2
JaCm14	1.9
JaCm14	3
JaCm14	1.3
JaCm14	3
JaCm14	2.1
JaCm14	1
JaCm14	1.5
JaCm14	3.4
JaCm14	2
JaCm14	2.4
JaCm14	2.7
JaCm14	1.9
JaCm14	2.9
JaCm14	3
JaCm14	1.5
JaCm14	2.2
JaCm14	1.7
JaCm21	2.9
JaCm21	2.7
JaCm21	2.7
JaCm21	3
JaCm21	2.3
JaCm21	1.7
JaCm21	2.6
JaCm21	1.3
JaCm21	2.7
JaCm21	2
JaCm21	1.1
JaCm21	1.5
JaCm21	2.3
JaCm21	1.6
JaCm21	3
JaCm21	2.1
JaCm21	2.9
JaCm21	1.8
JaCm21	1.2
JaCm21	2.7
JaCm22	2.7
JaCm22	3
JaCm22	2.1
JaCm22	3
JaCm22	3.1
JaCm22	2.3
JaCm22	2.1
JaCm22	2.5
JaCm22	1.7
JaCm22	1.9
JaCm22	2.2
JaCm22	1.6
JaCm22	2.3
JaCm22	2.6
JaCm22	1.6
JaCm22	2.4
JaCm22	2
JaCm22	1.3
JaCm22	2.6
JaCm22	2.1
JaCm23	3.1
JaCm23	2
JaCm23	2.5
JaCm23	1.4
JaCm23	3.2
JaCm23	2.4
JaCm23	1.6
JaCm23	3.1
JaCm23	2.2
JaCm23	2.3
JaCm23	1.2
JaCm23	2
JaCm23	1.5
JaCm23	3
JaCm23	2.2
JaCm23	2.2
JaCm23	1.2
JaCm23	3.2
JaCm23	2.9
JaCm23	2.5
JaCm24	3.6
JaCm24	2.4
JaCm24	2.2
JaCm24	2.9
JaCm24	2.8
JaCm24	2.1
JaCm24	2.7
JaCm24	1.5
JaCm24	2.5
JaCm24	3.2
JaCm24	1.6
JaCm24	2.8
JaCm24	2
JaCm24	2.5
JaCm24	2.3
JaCm24	2.9
JaCm24	2
JaCm24	2.4
JaCm24	1.4
JaCm24	1.9
JaMo11	2.6
JaMo11	1.5
JaMo11	2.5
JaMo11	1.4
JaMo11	1.9
JaMo11	2.7
JaMo11	2.1
JaMo11	1.7
JaMo11	2.5
JaMo11	1.9
JaMo11	3
JaMo11	2.9
JaMo11	1.9
JaMo11	1.6
JaMo11	2.7
JaMo11	1.7
JaMo11	2.3
JaMo11	1.4
JaMo11	1.3
JaMo11	1.7
JaMo12	3
JaMo12	1.2
JaMo12	2.3
JaMo12	1.9
JaMo12	2.6
JaMo12	1.4
JaMo12	2.8
JaMo12	2.2
JaMo12	2.1
JaMo12	1.5
JaMo12	3
JaMo12	2.4
JaMo12	1.8
JaMo12	1.2
JaMo12	2.5
JaMo12	2
JaMo12	1.4
JaMo12	2.4
JaMo12	3.1
JaMo12	1.5
JaMo13	2.5
JaMo13	3.1
JaMo13	1.8
JaMo13	2
JaMo13	1.9
JaMo13	3.1
JaMo13	1.7
JaMo13	2.4
JaMo13	1.7
JaMo13	3.3
JaMo13	1.2
JaMo13	2.6
JaMo13	2.8
JaMo13	3.3
JaMo13	2.5
JaMo13	2.1
JaMo13	2.9
JaMo13	1.6
JaMo13	2.8
JaMo13	1.2
JaMo14	2.8
JaMo14	1.7
JaMo14	2.9
JaMo14	2
JaMo14	2.9
JaMo14	2.8
JaMo14	3.5
JaMo14	3
JaMo14	2.3
JaMo14	2.7
JaMo14	1.7
JaMo14	1.5
JaMo14	3
JaMo14	3.4
JaMo14	2.7
JaMo14	1.1
JaMo14	2.3
JaMo14	1.3
JaMo14	2.8
JaMo14	2.1
JaMo21	1.7
JaMo21	2.2
JaMo21	1.8
JaMo21	2.3
JaMo21	2.6
JaMo21	1.5
JaMo21	2
JaMo21	1.3
JaMo21	2.7
JaMo21	1.8
JaMo21	2.3
JaMo21	1.1
JaMo21	2.3
JaMo21	1.6
JaMo21	1.8
JaMo21	0.7
JaMo21	1.4
JaMo21	2
JaMo21	2.6
JaMo21	2.4
JaMo22	2.4
JaMo22	2
JaMo22	2.5
JaMo22	2
JaMo22	1.2
JaMo22	1.6
JaMo22	0.8
JaMo22	2.3
JaMo22	2.3
JaMo22	1.6
JaMo22	1.5
JaMo22	1.7
JaMo22	1.3
JaMo22	2.3
JaMo22	2.7
JaMo22	1.9
JaMo22	2
JaMo22	2.7
JaMo22	1.2
JaMo22	2.1
JaMo23	2.5
JaMo23	3.5
JaMo23	2.7
JaMo23	3.2
JaMo23	1.5
JaMo23	2.9
JaMo23	2.9
JaMo23	1.5
JaMo23	2.5
JaMo23	1.5
JaMo23	1.8
JaMo23	2.9
JaMo23	2.6
JaMo23	2.8
JaMo23	2.6
JaMo23	1.8
JaMo23	1
JaMo23	1.9
JaMo23	3.5
JaMo23	2.8
JaMo24	3.9
JaMo24	3
JaMo24	2.8
JaMo24	2.3
JaMo24	1.2
JaMo24	2
JaMo24	1.8
JaMo24	3.1
JaMo24	2
JaMo24	2.9
JaMo24	1.9
JaMo24	3.5
JaMo24	1.7
JaMo24	3.3
JaMo24	1.6
JaMo24	2.2
JaMo24	3.5
JaMo24	2.5
JaMo24	2
JaMo24	1
JaFo11	3.3
JaFo11	1.3
JaFo11	3.7
JaFo11	3.2
JaFo11	1.1
JaFo11	2
JaFo11	3.3
JaFo11	2.7
JaFo11	0.9
JaFo11	1.6
JaFo11	3.6
JaFo11	3.1
JaFo11	2.7
JaFo11	1.5
JaFo11	2.5
JaFo11	3.3
JaFo11	2.7
JaFo11	2.4
JaFo11	1.2
JaFo11	0.9
JaFo12	1.7
JaFo12	2.7
JaFo12	3.5
JaFo12	3.8
JaFo12	3.9
JaFo12	2.9
JaFo12	4
JaFo12	1.8
JaFo12	2
JaFo12	2.5
JaFo12	4.4
JaFo12	3.8
JaFo12	1.2
JaFo12	1.1
JaFo12	2.5
JaFo12	3.6
JaFo12	3
JaFo12	2.7
JaFo12	2
JaFo12	1.4
JaFo13	2.3
JaFo13	2.5
JaFo13	2.3
JaFo13	2.1
JaFo13	2.3
JaFo13	1.6
JaFo13	2.3
JaFo13	1.5
JaFo13	2
JaFo13	2.7
JaFo13	2
JaFo13	2.1
JaFo13	2.4
JaFo13	1.6
JaFo13	2.1
JaFo13	1.7
JaFo13	2.3
JaFo13	1.9
JaFo13	1.4
JaFo13	2.9
JaFo14	2.9
JaFo14	2.2
JaFo14	3.2
JaFo14	3.6
JaFo14	2
JaFo14	1.8
JaFo14	1.4
JaFo14	3.5
JaFo14	3
JaFo14	1.5
JaFo14	3.9
JaFo14	3.1
JaFo14	1.9
JaFo14	2
JaFo14	2.1
JaFo14	1.2
JaFo14	2.3
JaFo14	1
JaFo14	1.5
JaFo14	1.4
JaFo21	2.7
JaFo21	2.5
JaFo21	3.4
JaFo21	3.6
JaFo21	1.8
JaFo21	3.2
JaFo21	2
JaFo21	1.7
JaFo21	2.8
JaFo21	1.7
JaFo21	3.5
JaFo21	2.5
JaFo21	1.2
JaFo21	2.2
JaFo21	1.7
JaFo21	2.9
JaFo21	2.7
JaFo21	2.7
JaFo21	1.5
JaFo21	1.7
JaFo22	2.7
JaFo22	2.9
JaFo22	2.6
JaFo22	2
JaFo22	3.2
JaFo22	1.9
JaFo22	1.9
JaFo22	2.9
JaFo22	1.8
JaFo22	1.1
JaFo22	3.2
JaFo22	2.1
JaFo22	2.9
JaFo22	1.6
JaFo22	2.1
JaFo22	1.3
JaFo22	2.4
JaFo22	2.9
JaFo22	1.4
JaFo22	1.6
JaFo23	3.5
JaFo23	2.7
JaFo23	3.2
JaFo23	2.3
JaFo23	1.4
JaFo23	2.5
JaFo23	2.8
JaFo23	1.6
JaFo23	2.2
JaFo23	2.6
JaFo23	3.1
JaFo23	1.2
JaFo23	1.7
JaFo23	3.7
JaFo23	1.2
JaFo23	2.7
JaFo23	1.8
JaFo23	2.3
JaFo23	1
JaFo23	0.8
JaFo24	3.2
JaFo24	3
JaFo24	2.8
JaFo24	1.8
JaFo24	1.7
JaFo24	2
JaFo24	3.4
JaFo24	2.4
JaFo24	2.2
JaFo24	2.4
JaFo24	1.2
JaFo24	1.9
JaFo24	1.5
JaFo24	2.1
JaFo24	3.2
JaFo24	1.2
JaFo24	1.7
JaFo24	3.2
JaFo24	1.9
JaFo24	3.2
JaCa11	2.3
JaCa11	2.5
JaCa11	1.5
JaCa11	3.2
JaCa11	2.7
JaCa11	2.4
JaCa11	2
JaCa11	2.1
JaCa11	1.5
JaCa11	3
JaCa11	2.1
JaCa11	1.2
JaCa11	2.4
JaCa11	1.5
JaCa11	2.7
JaCa11	2.1
JaCa11	1.8
JaCa11	2.1
JaCa11	2
JaCa11	1.3
JaCa12	2.3
JaCa12	1.9
JaCa12	1.3
JaCa12	3.5
JaCa12	2
JaCa12	2
JaCa12	1.2
JaCa12	2.5
JaCa12	2.2
JaCa12	2.1
JaCa12	1.5
JaCa12	2.9
JaCa12	2.6
JaCa12	2
JaCa12	1.2
JaCa12	2.3
JaCa12	1.3
JaCa12	2.5
JaCa12	3.8
JaCa12	1.2
JaCa13	2.8
JaCa13	1.9
JaCa13	2.5
JaCa13	1.9
JaCa13	3.1
JaCa13	2.5
JaCa13	1.7
JaCa13	1.8
JaCa13	2.7
JaCa13	1.3
JaCa13	0.9
JaCa13	2
JaCa13	1.9
JaCa13	3.5
JaCa13	2.5
JaCa13	2.1
JaCa13	2.8
JaCa13	2.4
JaCa13	2.9
JaCa13	1.7
JaCa14	1.8
JaCa14	2.3
JaCa14	1.9
JaCa14	1.8
JaCa14	2.5
JaCa14	1.4
JaCa14	2.3
JaCa14	1.8
JaCa14	2
JaCa14	2.6
JaCa14	2.6
JaCa14	1.7
JaCa14	1.3
JaCa14	2.5
JaCa14	3.2
JaCa14	1.9
JaCa14	2.4
JaCa14	1.1
JaCa14	2.2
JaCa14	1.4
JaCa21	2.7
JaCa21	2.2
JaCa21	2.7
JaCa21	2.6
JaCa21	2.5
JaCa21	1.7
JaCa21	3.1
JaCa21	2
JaCa21	3.1
JaCa21	2.1
JaCa21	2.1
JaCa21	1.7
JaCa21	1.9
JaCa21	3.4
JaCa21	1.4
JaCa21	2.9
JaCa21	1.9
JaCa21	1.4
JaCa21	1.6
JaCa21	3.2
JaCa22	1.5
JaCa22	1.2
JaCa22	1.9
JaCa22	2
JaCa22	3.4
JaCa22	2.2
JaCa22	1.5
JaCa22	3.2
JaCa22	3
JaCa22	1.7
JaCa22	3.5
JaCa22	1.7
JaCa22	1.6
JaCa22	2.5
JaCa22	1.4
JaCa22	2.8
JaCa22	2.2
JaCa22	1.7
JaCa22	2.2
JaCa22	1.2
JaCa23	2.8
JaCa23	2.8
JaCa23	2
JaCa23	1.2
JaCa23	3.2
JaCa23	1.7
JaCa23	3.1
JaCa23	1.9
JaCa23	3
JaCa23	1.4
JaCa23	2.6
JaCa23	2
JaCa23	0.9
JaCa23	1.8
JaCa23	2.5
JaCa23	3.9
JaCa23	1.8
JaCa23	1.3
JaCa23	2.7
JaCa23	1.4
JaCa24	2.6
JaCa24	1.3
JaCa24	2.7
JaCa24	2
JaCa24	1.3
JaCa24	1.7
JaCa24	3.1
JaCa24	3.1
JaCa24	1.7
JaCa24	1.7
JaCa24	3.6
JaCa24	1.5
JaCa24	2.1
JaCa24	1.9
JaCa24	3.6
JaCa24	1.4
JaCa24	2.6
JaCa24	1.3
JaCa24	1.6
JaCa24	3
AbAg11	2.4
AbAg11	3.5
AbAg11	1.5
AbAg11	3.4
AbAg11	2
AbAg11	2.9
AbAg11	2
AbAg11	1.8
AbAg11	3
AbAg11	3.1
AbAg11	1.9
AbAg11	1.5
AbAg11	2.5
AbAg11	3.9
AbAg11	1.7
AbAg11	1.3
AbAg11	2.4
AbAg11	1.9
AbAg11	3
AbAg11	2.6
AbAg12	2.4
AbAg12	3
AbAg12	2.2
AbAg12	3.2
AbAg12	1.6
AbAg12	2.3
AbAg12	4
AbAg12	1.9
AbAg12	3.1
AbAg12	3.7
AbAg12	2.6
AbAg12	1.5
AbAg12	3.1
AbAg12	1.7
AbAg12	2.2
AbAg12	2.5
AbAg12	1.9
AbAg12	3.5
AbAg12	1.5
AbAg12	1.3
AbAg13	2.9
AbAg13	3.6
AbAg13	1.5
AbAg13	2.1
AbAg13	4
AbAg13	2.4
AbAg13	2.8
AbAg13	1
AbAg13	1.5
AbAg13	2.7
AbAg13	2.8
AbAg13	1.9
AbAg13	1.8
AbAg13	1.7
AbAg13	1.7
AbAg13	3.8
AbAg13	3.4
AbAg13	2.9
AbAg13	2.3
AbAg13	3
AbAg14	3.4
AbAg14	1.9
AbAg14	2.7
AbAg14	1.6
AbAg14	1.2
AbAg14	3.1
AbAg14	2.7
AbAg14	2.2
AbAg14	1.6
AbAg14	2.6
AbAg14	1.8
AbAg14	1.4
AbAg14	2.9
AbAg14	2.2
AbAg14	2.5
AbAg14	2.1
AbAg14	2.6
AbAg14	1.9
AbAg14	1.5
AbAg14	1.9
AbAg21	4.2
AbAg21	2.3
AbAg21	2.5
AbAg21	1.8
AbAg21	2.7
AbAg21	1.8
AbAg21	4
AbAg21	1.5
AbAg21	4
AbAg21	2
AbAg21	2.3
AbAg21	3.8
AbAg21	1.9
AbAg21	2.5
AbAg21	3.4
AbAg21	2.5
AbAg21	3.4
AbAg21	1.5
AbAg21	2.4
AbAg21	1.5
AbAg22	3.1
AbAg22	3.9
AbAg22	2.5
AbAg22	2.3
AbAg22	3.2
AbAg22	1.9
AbAg22	3.6
AbAg22	2.4
AbAg22	2.5
AbAg22	2.5
AbAg22	2.8
AbAg22	2.6
AbAg22	3.5
AbAg22	1.4
AbAg22	3
AbAg22	2.3
AbAg22	3.2
AbAg22	3.4
AbAg22	2.5
AbAg22	1.3
AbAg23	3.2
AbAg23	2.2
AbAg23	3.7
AbAg23	2.3
AbAg23	1.9
AbAg23	1.9
AbAg23	3.8
AbAg23	2.4
AbAg23	1.4
AbAg23	2.4
AbAg23	3.9
AbAg23	2.4
AbAg23	1.5
AbAg23	2.6
AbAg23	1.6
AbAg23	1.3
AbAg23	2.4
AbAg23	1.7
AbAg23	2.6
AbAg23	1
AbAg24	4.1
AbAg24	1.7
AbAg24	3.6
AbAg24	2.8
AbAg24	1.9
AbAg24	3.4
AbAg24	2.8
AbAg24	1.9
AbAg24	3.4
AbAg24	2.2
AbAg24	1.7
AbAg24	1.9
AbAg24	4.1
AbAg24	2.5
AbAg24	1.5
AbAg24	1.8
AbAg24	3.3
AbAg24	4
AbAg24	2.4
AbAg24	1.6
AbVa11	2.2
AbVa11	3
AbVa11	2.1
AbVa11	1.9
AbVa11	2
AbVa11	2.6
AbVa11	2.2
AbVa11	2.5
AbVa11	3.3
AbVa11	1.7
AbVa11	2.3
AbVa11	2.8
AbVa11	3
AbVa11	2.3
AbVa11	1.5
AbVa11	2.2
AbVa11	1.7
AbVa11	1.4
AbVa11	2.9
AbVa11	3.1
AbVa12	3
AbVa12	2
AbVa12	2.1
AbVa12	1.7
AbVa12	1.1
AbVa12	3
AbVa12	2.5
AbVa12	2.4
AbVa12	1.7
AbVa12	1.4
AbVa12	2.5
AbVa12	1.4
AbVa12	1.4
AbVa12	2.3
AbVa12	2.5
AbVa12	2
AbVa12	2.5
AbVa12	1.8
AbVa12	1.5
AbVa12	1.2
AbVa13	1.4
AbVa13	2.6
AbVa13	3.7
AbVa13	1.7
AbVa13	2.1
AbVa13	3
AbVa13	3
AbVa13	1.4
AbVa13	2
AbVa13	2.9
AbVa13	3.6
AbVa13	1.8
AbVa13	3.3
AbVa13	2.6
AbVa13	1.2
AbVa13	2.7
AbVa13	2.8
AbVa13	1.6
AbVa13	1.3
AbVa13	2.2
AbVa14	3.4
AbVa14	3.2
AbVa14	1.7
AbVa14	2.2
AbVa14	1.9
AbVa14	1
AbVa14	2
AbVa14	3.9
AbVa14	2.7
AbVa14	2.7
AbVa14	3.4
AbVa14	2.2
AbVa14	2.4
AbVa14	1.7
AbVa14	1.8
AbVa14	2
AbVa14	2.2
AbVa14	1.5
AbVa14	3.3
AbVa14	1.2
AbVa21	3
AbVa21	1.2
AbVa21	1.6
AbVa21	3.7
AbVa21	2.5
AbVa21	1.5
AbVa21	2.5
AbVa21	3.7
AbVa21	2
AbVa21	2.9
AbVa21	1.7
AbVa21	2.5
AbVa21	1.8
AbVa21	2.5
AbVa21	1.8
AbVa21	2
AbVa21	2.8
AbVa21	1.8
AbVa21	2.6
AbVa21	1
AbVa22	2.7
AbVa22	1.8
AbVa22	2.1
AbVa22	2.3
AbVa22	1.1
AbVa22	2.4
AbVa22	1.8
AbVa22	2
AbVa22	1.6
AbVa22	1.8
AbVa22	1.8
AbVa22	1.8
AbVa22	2.6
AbVa22	2.1
AbVa22	1
AbVa22	3.2
AbVa22	1.6
AbVa22	2.4
AbVa22	1.8
AbVa22	2.4
AbVa23	3.9
AbVa23	1.2
AbVa23	1.9
AbVa23	2.5
AbVa23	1.7
AbVa23	3.3
AbVa23	2.3
AbVa23	1.4
AbVa23	2.1
AbVa23	4.7
AbVa23	3.4
AbVa23	3.7
AbVa23	2.8
AbVa23	2.7
AbVa23	1.5
AbVa23	1.7
AbVa23	1.9
AbVa23	1.4
AbVa23	2
AbVa23	1.2
AbVa24	4.1
AbVa24	3.3
AbVa24	2.9
AbVa24	2.1
AbVa24	4.4
AbVa24	2.6
AbVa24	1.3
AbVa24	3.3
AbVa24	2.1
AbVa24	1.3
AbVa24	2
AbVa24	4.6
AbVa24	1.6
AbVa24	1.8
AbVa24	1.9
AbVa24	2.1
AbVa24	4.6
AbVa24	2.5
AbVa24	1.4
AbVa24	1.1
AbCm11	3.7
AbCm11	3.5
AbCm11	2.7
AbCm11	2
AbCm11	2.5
AbCm11	2.6
AbCm11	2.4
AbCm11	1.7
AbCm11	2.3
AbCm11	1.7
AbCm11	1.2
AbCm11	3
AbCm11	2.7
AbCm11	2
AbCm11	1.3
AbCm11	2
AbCm11	1.4
AbCm11	3
AbCm11	2
AbCm11	1.1
AbCm12	3.3
AbCm12	2.6
AbCm12	2.1
AbCm12	2.1
AbCm12	1.6
AbCm12	2
AbCm12	1.6
AbCm12	2.1
AbCm12	2.8
AbCm12	2.2
AbCm12	1.3
AbCm12	2
AbCm12	2.3
AbCm12	1.7
AbCm12	1.3
AbCm12	2.2
AbCm12	0.9
AbCm12	1.7
AbCm12	2
AbCm12	1.6
AbCm13	2.3
AbCm13	2
AbCm13	1.8
AbCm13	1.6
AbCm13	1.6
AbCm13	2.3
AbCm13	1.3
AbCm13	2.3
AbCm13	2.4
AbCm13	2.1
AbCm13	2.3
AbCm13	1.7
AbCm13	1.7
AbCm13	1.4
AbCm13	2.3
AbCm13	2.1
AbCm13	1.2
AbCm13	2.4
AbCm13	1.5
AbCm13	1.7
AbCm14	1.8
AbCm14	2.4
AbCm14	1.3
AbCm14	2
AbCm14	1.9
AbCm14	1.3
AbCm14	2.2
AbCm14	1.9
AbCm14	1.7
AbCm14	1.8
AbCm14	1.9
AbCm14	1.7
AbCm14	2.4
AbCm14	1.7
AbCm14	1
AbCm14	2.3
AbCm14	1.7
AbCm14	2.5
AbCm14	1.7
AbCm14	2.6
AbCm21	3
AbCm21	3.5
AbCm21	3
AbCm21	1.7
AbCm21	2
AbCm21	4
AbCm21	3.1
AbCm21	1.7
AbCm21	3.5
AbCm21	1.3
AbCm21	3.1
AbCm21	1.4
AbCm21	2.2
AbCm21	3.1
AbCm21	1.7
AbCm21	3.4
AbCm21	3.6
AbCm21	2.9
AbCm21	2.4
AbCm21	1.8
AbCm22	2
AbCm22	1.4
AbCm22	1.4
AbCm22	2.5
AbCm22	2
AbCm22	2.3
AbCm22	2.4
AbCm22	2.5
AbCm22	1.3
AbCm22	1.4
AbCm22	2.1
AbCm22	2
AbCm22	2
AbCm22	1.4
AbCm22	1.3
AbCm22	2.5
AbCm22	2.1
AbCm22	1.5
AbCm22	1.4
AbCm22	1.4
AbCm23	1.8
AbCm23	1.7
AbCm23	1.8
AbCm23	1.9
AbCm23	1.9
AbCm23	1.8
AbCm23	1.8
AbCm23	1.4
AbCm23	1.8
AbCm23	1.7
AbCm23	1.6
AbCm23	1.8
AbCm23	1.6
AbCm23	2.1
AbCm23	1.4
AbCm23	1.9
AbCm23	1.6
AbCm23	1.7
AbCm23	1.8
AbCm23	1.6
AbCm24	1.8
AbCm24	2.1
AbCm24	1.9
AbCm24	2.1
AbCm24	1.3
AbCm24	2
AbCm24	2
AbCm24	1.4
AbCm24	1
AbCm24	1.6
AbCm24	2.4
AbCm24	1.8
AbCm24	1.9
AbCm24	2.5
AbCm24	1.7
AbCm24	2.5
AbCm24	1.8
AbCm24	1.8
AbCm24	2.2
AbCm24	1.6
AbMo11	2.5
AbMo11	2.9
AbMo11	2.4
AbMo11	2.4
AbMo11	1.7
AbMo11	2.4
AbMo11	2.2
AbMo11	2.6
AbMo11	1.6
AbMo11	1.4
AbMo11	2.2
AbMo11	1.9
AbMo11	1.8
AbMo11	1.3
AbMo11	2.3
AbMo11	2.7
AbMo11	2.6
AbMo11	2
AbMo11	1.7
AbMo11	1.2
AbMo12	2.9
AbMo12	3.5
AbMo12	2.4
AbMo12	2.3
AbMo12	2.5
AbMo12	3.9
AbMo12	1.6
AbMo12	2.9
AbMo12	1.6
AbMo12	2.1
AbMo12	1.8
AbMo12	3.1
AbMo12	1.6
AbMo12	2.8
AbMo12	1.5
AbMo12	1.2
AbMo12	2.3
AbMo12	1.7
AbMo12	2.2
AbMo12	1.4
AbMo13	2.7
AbMo13	2.7
AbMo13	2.3
AbMo13	1.6
AbMo13	2.5
AbMo13	2.2
AbMo13	2.7
AbMo13	1.4
AbMo13	1.8
AbMo13	2.1
AbMo13	2.5
AbMo13	1.6
AbMo13	2.5
AbMo13	1.7
AbMo13	2.6
AbMo13	1
AbMo13	1.9
AbMo13	2.3
AbMo13	2.3
AbMo13	2.3
AbMo14	2
AbMo14	2.1
AbMo14	2.7
AbMo14	1.2
AbMo14	2.2
AbMo14	1.9
AbMo14	1.9
AbMo14	1.6
AbMo14	2.6
AbMo14	2
AbMo14	1.4
AbMo14	1.9
AbMo14	1.7
AbMo14	2.6
AbMo14	1.1
AbMo14	1.3
AbMo14	2.5
AbMo14	1.9
AbMo14	1.4
AbMo14	1.9
AbMo21	2.9
AbMo21	2.5
AbMo21	1.8
AbMo21	2.8
AbMo21	2.2
AbMo21	1.4
AbMo21	2.7
AbMo21	2.7
AbMo21	1.3
AbMo21	2.9
AbMo21	1.7
AbMo21	1.4
AbMo21	2.7
AbMo21	1.7
AbMo21	2.2
AbMo21	1.3
AbMo21	1.4
AbMo21	2.4
AbMo21	1.3
AbMo21	2
AbMo22	1.8
AbMo22	2.1
AbMo22	2.5
AbMo22	2.3
AbMo22	2.5
AbMo22	1.2
AbMo22	1.7
AbMo22	2.5
AbMo22	1.8
AbMo22	1.7
AbMo22	1.7
AbMo22	2
AbMo22	2.6
AbMo22	1.5
AbMo22	1.6
AbMo22	2.3
AbMo22	1.6
AbMo22	1.8
AbMo22	2.3
AbMo22	1.8
AbMo23	2.9
AbMo23	1.7
AbMo23	2.6
AbMo23	2.2
AbMo23	2.2
AbMo23	2.5
AbMo23	1.7
AbMo23	2.2
AbMo23	1.4
AbMo23	2
AbMo23	1
AbMo23	1.1
AbMo23	2.2
AbMo23	1.8
AbMo23	2.4
AbMo23	1
AbMo23	1.1
AbMo23	1.5
AbMo23	2.3
AbMo23	3.4
AbMo24	2.8
AbMo24	2.9
AbMo24	1.5
AbMo24	2.6
AbMo24	3.2
AbMo24	2.8
AbMo24	2.2
AbMo24	2.4
AbMo24	1.2
AbMo24	1.5
AbMo24	3.8
AbMo24	3.4
AbMo24	2.1
AbMo24	3.4
AbMo24	2.5
AbMo24	1.2
AbMo24	1.5
AbMo24	2.8
AbMo24	1.4
AbMo24	1.6
AbFo11	3.1
AbFo11	1.2
AbFo11	3.1
AbFo11	2.1
AbFo11	2.8
AbFo11	2.4
AbFo11	3.2
AbFo11	2.5
AbFo11	2.4
AbFo11	3.1
AbFo11	2.2
AbFo11	2.4
AbFo11	2.8
AbFo11	1.7
AbFo11	2.4
AbFo11	1.9
AbFo11	1.5
AbFo11	2.2
AbFo11	1.7
AbFo11	1.3
AbFo12	3.2
AbFo12	1.4
AbFo12	1.9
AbFo12	3.2
AbFo12	2.1
AbFo12	1.4
AbFo12	2.9
AbFo12	1.7
AbFo12	2.9
AbFo12	3.9
AbFo12	1.5
AbFo12	2.9
AbFo12	1.8
AbFo12	1.7
AbFo12	3.5
AbFo12	3.7
AbFo12	1.5
AbFo12	1
AbFo12	1.3
AbFo12	1
AbFo13	2.3
AbFo13	1.9
AbFo13	1.9
AbFo13	1.4
AbFo13	1.8
AbFo13	2.9
AbFo13	1.8
AbFo13	2.3
AbFo13	1.6
AbFo13	1.5
AbFo13	1.9
AbFo13	1.6
AbFo13	2.4
AbFo13	1.8
AbFo13	2.3
AbFo13	1.7
AbFo13	1.2
AbFo13	2.7
AbFo13	1.8
AbFo13	2
AbFo14	3.2
AbFo14	2.3
AbFo14	3.2
AbFo14	1.8
AbFo14	3
AbFo14	4.1
AbFo14	1.4
AbFo14	2
AbFo14	3.8
AbFo14	1.8
AbFo14	2.3
AbFo14	1.7
AbFo14	1.2
AbFo14	2.2
AbFo14	3.8
AbFo14	1.3
AbFo14	2.1
AbFo14	1.4
AbFo14	1.6
AbFo14	2.6
AbFo21	2.1
AbFo21	1.7
AbFo21	1.6
AbFo21	2.5
AbFo21	2.6
AbFo21	1.8
AbFo21	1.7
AbFo21	1.7
AbFo21	2.6
AbFo21	2.7
AbFo21	2.4
AbFo21	2.2
AbFo21	2.2
AbFo21	2.1
AbFo21	1.7
AbFo21	2.5
AbFo21	1.8
AbFo21	1.9
AbFo21	1.7
AbFo21	1.5
AbFo22	1.6
AbFo22	2.5
AbFo22	1.8
AbFo22	2.6
AbFo22	2.5
AbFo22	2.7
AbFo22	1.5
AbFo22	2.6
AbFo22	3.1
AbFo22	1.9
AbFo22	2.3
AbFo22	2.5
AbFo22	2.3
AbFo22	1.4
AbFo22	2.2
AbFo22	2.7
AbFo22	2
AbFo22	2.6
AbFo22	2.5
AbFo22	1.7
AbFo23	2.3
AbFo23	2.8
AbFo23	2.4
AbFo23	1.3
AbFo23	1.5
AbFo23	2.6
AbFo23	1.4
AbFo23	1.8
AbFo23	2.2
AbFo23	2.9
AbFo23	2.3
AbFo23	1.7
AbFo23	1.9
AbFo23	1.5
AbFo23	3.1
AbFo23	3
AbFo23	2.6
AbFo23	1.5
AbFo23	2.8
AbFo23	1.8
AbFo24	3.4
AbFo24	2.2
AbFo24	2.6
AbFo24	3.8
AbFo24	3.4
AbFo24	2.8
AbFo24	2.7
AbFo24	3.3
AbFo24	3.5
AbFo24	3.8
AbFo24	2.7
AbFo24	1.4
AbFo24	2
AbFo24	3
AbFo24	3.1
AbFo24	3.6
AbFo24	3.2
AbFo24	2.2
AbFo24	2.4
AbFo24	1.3
AbCa11	2.1
AbCa11	1.9
AbCa11	2.2
AbCa11	2.5
AbCa11	2
AbCa11	1.4
AbCa11	1
AbCa11	2.7
AbCa11	2.5
AbCa11	1.7
AbCa11	1.2
AbCa11	3.4
AbCa11	3
AbCa11	2.5
AbCa11	1.9
AbCa11	2
AbCa11	3.3
AbCa11	1.2
AbCa11	2
AbCa11	1.5
AbCa12	3.9
AbCa12	3.2
AbCa12	3
AbCa12	2
AbCa12	1.2
AbCa12	3
AbCa12	2.9
AbCa12	2.5
AbCa12	1.9
AbCa12	1.4
AbCa12	2.3
AbCa12	1.5
AbCa12	1.7
AbCa12	2.4
AbCa12	2.8
AbCa12	2
AbCa12	1.7
AbCa12	1.8
AbCa12	1.3
AbCa12	0.9
AbCa13	3.4
AbCa13	2
AbCa13	3
AbCa13	1.5
AbCa13	2
AbCa13	3.1
AbCa13	2.1
AbCa13	1.7
AbCa13	2.7
AbCa13	3.3
AbCa13	2.4
AbCa13	2.3
AbCa13	1.4
AbCa13	1
AbCa13	1.8
AbCa13	2
AbCa13	1.2
AbCa13	1.2
AbCa13	1.7
AbCa13	1.1
AbCa14	2.4
AbCa14	1.8
AbCa14	2.3
AbCa14	1.9
AbCa14	2.1
AbCa14	2.9
AbCa14	2.7
AbCa14	2.3
AbCa14	1.6
AbCa14	1
AbCa14	3.4
AbCa14	3.2
AbCa14	3
AbCa14	2.2
AbCa14	1.4
AbCa14	2.7
AbCa14	2.6
AbCa14	3.1
AbCa14	1.7
AbCa14	0.8
AbCa21	2.5
AbCa21	2.1
AbCa21	1.8
AbCa21	3
AbCa21	2.6
AbCa21	2.2
AbCa21	2.8
AbCa21	1.8
AbCa21	2.4
AbCa21	1.7
AbCa21	1.6
AbCa21	3
AbCa21	3
AbCa21	2.6
AbCa21	2.4
AbCa21	1.9
AbCa21	2.2
AbCa21	2
AbCa21	1.2
AbCa21	1.4
AbCa22	3.2
AbCa22	2.4
AbCa22	1.4
AbCa22	2
AbCa22	3
AbCa22	2
AbCa22	2.9
AbCa22	2.3
AbCa22	1.5
AbCa22	3
AbCa22	2.6
AbCa22	2
AbCa22	1.7
AbCa22	2.5
AbCa22	1.9
AbCa22	3.3
AbCa22	2.6
AbCa22	1.9
AbCa22	2.2
AbCa22	1
AbCa23	3
AbCa23	2.1
AbCa23	1.8
AbCa23	3.6
AbCa23	2.6
AbCa23	1.9
AbCa23	3
AbCa23	2.3
AbCa23	2.1
AbCa23	3.1
AbCa23	1.3
AbCa23	1.1
AbCa23	2.5
AbCa23	3
AbCa23	1.2
AbCa23	2.4
AbCa23	1.5
AbCa23	2.8
AbCa23	2.3
AbCa23	1.6
AbCa24	2.4
AbCa24	1.9
AbCa24	2.7
AbCa24	3.6
AbCa24	3.6
AbCa24	1.5
AbCa24	3.9
AbCa24	3.6
AbCa24	1.6
AbCa24	2.9
AbCa24	2.4
AbCa24	1.5
AbCa24	1.7
AbCa24	3.6
AbCa24	1.5
AbCa24	2
AbCa24	1.3
AbCa24	2.4
AbCa24	1.8
AbCa24	1.1
JuAg11	1.8
JuAg11	2.1
JuAg11	2.7
JuAg11	3
JuAg11	3.7
JuAg11	2.3
JuAg11	2.3
JuAg11	2.8
JuAg11	1.8
JuAg11	3.1
JuAg11	1
JuAg11	2.6
JuAg11	1
JuAg11	1.8
JuAg11	1.7
JuAg11	2.5
JuAg11	1.9
JuAg11	1.9
JuAg11	2.3
JuAg11	1.5
JuAg12	2.2
JuAg12	2.9
JuAg12	2.4
JuAg12	3.2
JuAg12	1.9
JuAg12	1.4
JuAg12	2
JuAg12	1.3
JuAg12	1.1
JuAg12	4.1
JuAg12	2.7
JuAg12	1.8
JuAg12	2.1
JuAg12	2.1
JuAg12	3.7
JuAg12	1.9
JuAg12	2.3
JuAg12	1.8
JuAg12	2.1
JuAg12	2.1
JuAg13	2.8
JuAg13	3.3
JuAg13	2
JuAg13	1.8
JuAg13	3.3
JuAg13	2.2
JuAg13	3.1
JuAg13	2.1
JuAg13	1.3
JuAg13	3.3
JuAg13	1.7
JuAg13	2.2
JuAg13	1.2
JuAg13	1.9
JuAg13	1.5
JuAg13	1.3
JuAg13	1.5
JuAg13	3
JuAg13	1.3
JuAg13	1.2
JuAg14	2.3
JuAg14	1.9
JuAg14	1.7
JuAg14	2.6
JuAg14	1
JuAg14	1.1
JuAg14	1.8
JuAg14	2.3
JuAg14	3.1
JuAg14	2.9
JuAg14	1.3
JuAg14	2.7
JuAg14	3
JuAg14	1.5
JuAg14	1.8
JuAg14	3
JuAg14	1.7
JuAg14	1.7
JuAg14	1.9
[truncated: 3,761 more rows]

## Sheet: Condition Index
Code	soft body (g)	Shell (g)	Condition Index
JaAg11	0.0442	1.1896	0.0371553
JaAg11	0.0326	0.6185	0.0527082
JaAg11	0.0423	0.6564	0.0644424
JaAg11	0.0461	0.8762	0.0526136
JaAg11	0.0378	0.6873	0.0549978
JaAg11	0.0361	0.7374	0.0489558
JaAg11	0.0326	0.6932	0.0470283
JaAg11	0.0398	0.7021	0.0566871
JaAg11	0.044	0.8378	0.0525185
JaAg11	0.0583	0.9212	0.063287
JaAg12	0.1209	2.7449	0.0440453
JaAg12	0.1359	2.8586	0.0475408
JaAg12	0.1719	2.754	0.0624183
JaAg12	0.1496	2.7892	0.0536355
JaAg12	0.1857	2.7339	0.0679249
JaAg12	0.2511	5.441	0.0461496
JaAg12	0.0573	1.7938	0.0319434
JaAg12	0.1234	2.1555	0.0572489
JaAg12	0.2205	4.889	0.0451012
JaAg12	0.141	2.8767	0.0490145
JaAg13	0.1082	2.0491	0.0528037
JaAg13	0.0738	1.1132	0.0662954
JaAg13	0.0594	1.0214	0.0581555
JaAg13	0.0518	0.8466	0.0611859
JaAg13	0.1329	2.7065	0.049104
JaAg13	0.055	0.9029	0.0609148
JaAg13	0.055	0.7325	0.0750853
JaAg13	0.0559	0.775	0.072129
JaAg13	0.059	0.9596	0.061484
JaAg13	0.1048	1.6314	0.0642393
JaAg14	0.184	3.547	0.0518748
JaAg14	0.0709	2.081	0.0340702
JaAg14	0.0949	1.8253	0.0519915
JaAg14	0.0469	1.3324	0.0351996
JaAg14	0.0824	1.308	0.0629969
JaAg14	0.0628	1.603	0.0391765
JaAg14	0.1084	1.8262	0.0593582
JaAg14	0.077	2.0836	0.0369553
JaAg14	0.0837	1.7972	0.0465724
JaAg14	0.096	1.8908	0.0507722
JaAg21	0.068	1.2014	0.0566006
JaAg21	0.0888	1.456	0.060989
JaAg21	0.0467	0.7559	0.0617807
JaAg21	0.0606	0.9311	0.0650843
JaAg21	0.1047	1.5236	0.0687188
JaAg21	0.1224	2.3205	0.0527473
JaAg21	0.0699	0.9873	0.0707991
JaAg21	0.0687	1.1772	0.0583588
JaAg21	0.0621	0.9013	0.0689005
JaAg21	0.0528	1.0215	0.0516887
JaAg22	0.1237	3.4772	0.0355746
JaAg22	0.2475	2.3791	0.104031
JaAg22	0.2109	3.0148	0.0699549
JaAg22	0.1833	3.1487	0.0582145
JaAg22	0.1832	3.3513	0.0546654
JaAg22	0.2154	2.3807	0.0904776
JaAg22	0.2355	6.8602	0.0343284
JaAg22	0.1339	3.4629	0.038667
JaAg22	0.1948	2.6683	0.0730053
JaAg22	0.2847	4.1944	0.0678762
JaAg23	0.0595	1.1276	0.0527669
JaAg23	0.077	1.0528	0.0731383
JaAg23	0.1261	1.4155	0.0890851
JaAg23	0.0827	1.18	0.0700847
JaAg23	0.1336	1.9607	0.0681389
JaAg23	0.061	0.9071	0.0672473
JaAg23	0.0993	1.4468	0.0686342
JaAg23	0.0978	1.9224	0.0508739
JaAg23	0.0817	1.3277	0.061535
JaAg23	0.082	1.2181	0.067318
JaAg24	0.1258	2.4209	0.0519641
JaAg24	0.077	1.2794	0.0601845
JaAg24	0.0467	0.9908	0.0471336
JaAg24	0.0973	1.3544	0.0718399
JaAg24	0.1082	2.0613	0.0524911
JaAg24	0.0967	1.5726	0.0614905
JaAg24	0.1674	3.8511	0.0434681
JaAg24	0.0443	0.9128	0.048532
JaAg24	0.0572	0.9167	0.0623977
JaAg24	0.0579	0.8569	0.0675691
JaVa11	0.105	1.5748	0.0666751
JaVa11	0.217	1.1151	0.194601
JaVa11	0.0728	1.1937	0.0609868
JaVa11	0.1269	3.0232	0.0419754
JaVa11	0.1961	1.5989	0.122647
JaVa11	0.1166	1.8401	0.0633661
JaVa11	0.3092	2.3082	0.133957
JaVa11	0.1972	1.884	0.104671
JaVa11	0.1128	1.5375	0.0733659
JaVa11	0.1067	1.4789	0.0721482
JaVa12	0.2012	4.4274	0.0454443
JaVa12	0.1468	3.5088	0.0418377
JaVa12	0.1357	2.4291	0.0558643
JaVa12	0.1911	4.0122	0.0476297
JaVa12	0.1755	4.6771	0.0375233
JaVa12	0.1405	3.8888	0.0361294
JaVa12	0.134	2.372	0.0564924
JaVa12	0.0958	2.4602	0.0389399
JaVa12	0.1428	3.61	0.0395568
JaVa12	0.1223	2.5817	0.0473719
JaVa13	0.1621	2.5801	0.062827
JaVa13	0.2272	5.1164	0.0444062
JaVa13	0.2542	3.0307	0.083875
JaVa13	0.1117	3.3513	0.0333303
JaVa13	0.193	7.6746	0.0251479
JaVa13	0.119	2.7868	0.0427013
JaVa13	0.1302	3.928	0.0331466
JaVa13	0.1159	2.8762	0.0402962
JaVa13	0.1735	2.7738	0.0625496
JaVa13	0.1561	5.0553	0.0308785
JaVa14	0.1793	5.1991	0.0344867
JaVa14	0.1903	2.7032	0.070398
JaVa14	0.1523	3.0325	0.0502226
JaVa14	0.1801	4.4441	0.0405256
JaVa14	0.111	2.5795	0.0430316
JaVa14	0.149	3.7252	0.0399979
JaVa14	0.1116	1.4723	0.0757998
JaVa14	0.1373	1.3901	0.0987699
JaVa14	0.2598	5.1351	0.050593
JaVa14	0.1846	2.9292	0.0630206
JaVa21	0.0853	1.943	0.0439012
JaVa21	0.0681	1.0382	0.0655943
JaVa21	0.0521	0.8877	0.058691
JaVa21	0.1109	1.9304	0.0574492
JaVa21	0.0572	1.1111	0.0514805
JaVa21	0.0387	0.7436	0.0520441
JaVa21	0.127	1.935	0.0656331
JaVa21	0.0365	0.6693	0.0545346
JaVa21	0.0847	1.6173	0.0523712
JaVa21	0.0686	0.9904	0.0692649
JaVa22	0.1968	2.7152	0.0724808
JaVa22	0.343	6.0678	0.0565279
JaVa22	0.2084	5.0341	0.0413977
JaVa22	0.4611	8.408	0.0548406
JaVa22	0.1172	2.7409	0.0427597
JaVa22	0.4042	10.0286	0.0403047
JaVa22	0.4809	9.5188	0.0505211
JaVa22	0.3482	5.5691	0.0625236
JaVa22	0.2538	5.3464	0.0474712
JaVa22	0.2853	6.9607	0.0409873
JaVa23	0.2746	4.9356	0.0556366
JaVa23	0.217	2.6018	0.0834038
JaVa23	0.2505	5.0674	0.0494336
JaVa23	0.2259	4.3342	0.0521203
JaVa23	0.2535	4.5746	0.0554147
JaVa23	0.2421	3.3839	0.0715447
JaVa23	0.3316	9.214	0.0359887
JaVa23	0.3251	6.1988	0.0524456
JaVa23	0.3664	6.4092	0.0571678
JaVa23	0.3899	5.4683	0.0713019
JaVa24	0.2604	5.7871	0.0449966
JaVa24	0.2551	6.0848	0.0419241
JaVa24	0.2554	7.4616	0.0342286
JaVa24	0.2659	6.72	0.0395685
JaVa24	0.2752	6.5676	0.0419027
JaVa24	0.3049	7.9878	0.0381707
JaVa24	0.129	3.1071	0.0415178
JaVa24	0.1681	3.6871	0.0455914
JaVa24	0.3174	4.4113	0.0719516
JaVa24	0.2871	4.7723	0.0601597
JaCm11	0.09	1.4964	0.0601443
JaCm11	0.1641	2.1303	0.0770314
JaCm11	0.0886	1.6681	0.0531143
JaCm11	0.1121	1.7153	0.065353
JaCm11	0.112	1.5098	0.074182
JaCm11	0.1973	4.2215	0.0467369
JaCm11	0.1246	2.4144	0.051607
JaCm11	0.2133	3.1305	0.0681361
JaCm11	0.1007	1.6339	0.0616317
JaCm11	0.0788	1.4575	0.0540652
JaCm12	0.1	1.6338	0.061207
JaCm12	0.084	1.257	0.0668258
JaCm12	0.1456	2.0913	0.0696218
JaCm12	0.1011	1.315	0.0768821
JaCm12	0.1238	1.8608	0.0665305
JaCm12	0.0701	1.3506	0.0519029
JaCm12	0.161	1.5278	0.10538
JaCm12	0.1006	1.9257	0.0522407
JaCm12	0.1004	1.8416	0.0545178
JaCm12	0.1377	1.9604	0.0702408
JaCm13	0.1075	2.1818	0.0492712
JaCm13	0.1727	2.2506	0.0767351
JaCm13	0.095	1.1421	0.0831801
JaCm13	0.1156	1.832	0.0631004
JaCm13	0.1034	1.4307	0.0722723
JaCm13	0.0802	1.5563	0.0515325
JaCm13	0.1718	1.922	0.0893861
JaCm13	0.1161	1.7743	0.0654343
JaCm13	0.1715	1.4971	0.114555
JaCm13	0.0965	1.6994	0.0567847
JaCm14	0.0972	1.9823	0.049034
JaCm14	0.0662	0.8681	0.0762585
JaCm14	0.1112	1.9684	0.0564926
JaCm14	0.0717	1.3972	0.0513169
JaCm14	0.0837	0.9425	0.0888064
JaCm14	0.1583	1.4826	0.106772
JaCm14	0.0777	1.2892	0.0602699
JaCm14	0.0356	1.022	0.0348337
JaCm14	0.0736	0.9217	0.0798524
JaCm14	0.1231	1.7641	0.0697806
JaCm21	0.0973	1.3181	0.0738184
JaCm21	0.1358	1.9692	0.068962
JaCm21	0.1103	1.4296	0.0771544
JaCm21	0.0866	1.3598	0.0636858
JaCm21	0.1245	2.0086	0.0619835
JaCm21	0.1012	1.1239	0.0900436
JaCm21	0.0889	1.299	0.0684373
JaCm21	0.1292	2.1327	0.0605805
JaCm21	0.0726	1.1658	0.0622748
JaCm21	0.1111	1.6779	0.0662137
JaCm22	0.1465	2.3066	0.0635134
JaCm22	0.0753	1.2842	0.0586357
JaCm22	0.1157	1.597	0.0724483
JaCm22	0.0692	1.3192	0.052456
JaCm22	0.093	1.7087	0.0544273
JaCm22	0.0825	1.743	0.0473322
JaCm22	0.1286	1.5229	0.0844442
JaCm22	0.0878	1.4698	0.059736
JaCm22	0.1857	2.0523	0.0904838
JaCm22	0.0717	1.2034	0.0595812
JaCm23	0.0627	1.812	0.0346026
JaCm23	0.1356	1.4886	0.0910923
JaCm23	0.1122	2.0781	0.0539916
JaCm23	0.1598	1.8285	0.087394
JaCm23	0.1066	1.6677	0.0639204
JaCm23	0.0957	1.572	0.0608779
JaCm23	0.0752	1.1802	0.063718
JaCm23	0.1358	1.8305	0.0741874
JaCm23	0.1248	1.6948	0.073637
JaCm23	0.1583	2.1123	0.074942
JaCm24	0.1474	1.9368	0.0761049
JaCm24	0.0776	1.5218	0.0509922
JaCm24	0.077	1.3943	0.0552248
JaCm24	0.0892	1.0694	0.0834113
JaCm24	0.1938	2.4746	0.0783157
JaCm24	0.1068	1.8898	0.0565139
JaCm24	0.1062	1.8181	0.0584126
JaCm24	0.079	1.1923	0.0662585
JaCm24	0.1728	2.9194	0.0591902
JaCm24	0.0851	1.4557	0.0584598
JaMo11	0.0689	1.359	0.050699
JaMo11	0.048	0.9608	0.0499584
JaMo11	0.0375	1.1071	0.0338723
JaMo11	0.0427	1.1919	0.0358252
JaMo11	0.044	0.9729	0.0452256
JaMo11	0.0415	0.7468	0.0555704
JaMo11	0.0432	0.9208	0.0469157
JaMo11	0.0764	1.0753	0.0710499
JaMo11	0.0537	1.0839	0.0495433
JaMo11	0.043	1.0141	0.0424021
JaMo12	0.0531	1.0756	0.0493678
JaMo12	0.0705	1.302	0.0541475
JaMo12	0.0502	1.0116	0.0496244
JaMo12	0.0685	1.3908	0.0492522
JaMo12	0.0527	0.8723	0.060415
JaMo12	0.0568	1.7209	0.033006
JaMo12	0.0996	1.7586	0.056636
JaMo12	0.0708	0.9305	0.0760881
JaMo12	0.0612	1.227	0.0498778
JaMo12	0.0529	1.0373	0.0509978
JaMo13	0.0893	2.1995	0.0406001
JaMo13	0.09	1.3417	0.0670791
JaMo13	0.0678	1.3211	0.0513209
JaMo13	0.102	2.3263	0.0438465
JaMo13	0.0488	1.1226	0.0434705
JaMo13	0.0792	1.3542	0.0584847
JaMo13	0.0525	1.1091	0.0473357
JaMo13	0.0803	1.9507	0.0411647
JaMo13	0.1263	1.4332	0.0881245
JaMo13	0.0857	1.5673	0.05468
JaMo14	0.0798	1.3425	0.0594413
JaMo14	0.0947	1.3697	0.0691392
JaMo14	0.0624	1.1095	0.0562416
JaMo14	0.07163	1.0126	0.0707387
JaMo14	0.1122	2.1085	0.0532132
JaMo14	0.0672	1.2024	0.0558882
JaMo14	0.0873	1.494	0.0584337
JaMo14	0.113	1.2077	0.0935663
JaMo14	0.0757	1.3663	0.0554051
JaMo14	0.1359	2.0399	0.0666209
JaMo21	0.0641	1.1451	0.0559776
JaMo21	0.0554	0.889	0.0623172
JaMo21	0.055	0.8867	0.0620277
JaMo21	0.0365	0.8834	0.0413176
JaMo21	0.0491	1.1332	0.0433286
JaMo21	0.0281	0.8178	0.0343605
JaMo21	0.0453	1.0836	0.0418051
JaMo21	0.03	0.8264	0.036302
JaMo21	0.0409	0.7086	0.0577194
JaMo21	0.046	1.1921	0.0385874
JaMo22	0.0387	0.7284	0.0531301
JaMo22	0.0386	0.7923	0.0487189
JaMo22	0.0678	1.418	0.0478138
JaMo22	0.0505	0.8797	0.0574059
JaMo22	0.0628	1.2535	0.0500997
JaMo22	0.059	1.1506	0.0512776
JaMo22	0.0471	0.831	0.0566787
JaMo22	0.0431	1.0493	0.041075
JaMo22	0.0425	0.9473	0.0448644
JaMo22	0.0621	1.4857	0.0417985
JaMo23	0.0838	1.919	0.0436686
JaMo23	0.0871	1.3528	0.064385
JaMo23	0.1019	2.0462	0.0497996
JaMo23	0.0941	1.5556	0.0604911
JaMo23	0.0842	2.0737	0.0406038
JaMo23	0.0957	1.9449	0.0492056
JaMo23	0.1377	2.7594	0.0499022
JaMo23	0.0962	1.7884	0.0537911
JaMo23	0.1074	1.9597	0.0548043
JaMo23	0.1239	2.4181	0.0512386
JaMo24	0.155	2.6722	0.0580046
JaMo24	0.125	2.2661	0.0551608
JaMo24	0.138	1.702	0.0810811
JaMo24	0.0773	1.3847	0.0558244
JaMo24	0.1331	2.0426	0.065162
JaMo24	0.123	1.818	0.0676568
JaMo24	0.1353	1.7238	0.0784894
JaMo24	0.1424	2.7052	0.0526394
JaMo24	0.1365	2.36	0.057839
JaMo24	0.0864	1.3639	0.0633478
JaFo11	0.1892	2.7434	0.0689655
JaFo11	0.137	2.2101	0.0619881
JaFo11	0.152	1.9276	0.0788545
JaFo11	0.1657	2.959	0.0559986
JaFo11	0.1214	1.5083	0.080488
JaFo11	0.1371	1.8258	0.0750904
JaFo11	0.1401	1.9002	0.0737291
JaFo11	0.1158	1.6835	0.0687853
JaFo11	0.112	1.5044	0.0744483
JaFo11	0.1201	1.8688	0.0642658
JaFo12	0.1637	2.3378	0.0700231
JaFo12	0.1388	1.8692	0.0742564
JaFo12	0.0778	1.2893	0.0603428
JaFo12	0.1461	1.865	0.0783378
JaFo12	0.1255	1.6442	0.0763289
JaFo12	0.2178	3.2091	0.0678695
JaFo12	0.0761	1.1968	0.0635862
JaFo12	0.1309	2.1399	0.0611711
JaFo12	0.1541	1.9422	0.079343
JaFo12	0.1809	2.7408	0.0660026
JaFo13	0.0688	1.2151	0.0566209
JaFo13	0.0339	0.7971	0.0425292
JaFo13	0.0311	0.7007	0.0443842
JaFo13	0.059	0.9085	0.0649422
JaFo13	0.0372	0.5744	0.0647632
JaFo13	0.0862	0.868	0.0993088
JaFo13	0.0543	0.8358	0.0649677
JaFo13	0.0327	0.7868	0.0415608
JaFo13	0.0433	1.5553	0.0278403
JaFo13	0.0513	1.224	0.0419118
JaFo14	0.1023	1.7067	0.0599402
JaFo14	0.1256	2.1629	0.0580702
JaFo14	0.0963	1.5789	0.0609918
JaFo14	0.0738	1.1305	0.0652808
JaFo14	0.1364	1.547	0.0881707
JaFo14	0.0986	1.3212	0.0746291
JaFo14	0.1348	1.7468	0.0771697
JaFo14	0.1586	1.6707	0.0949303
JaFo14	0.1093	1.6218	0.0673943
JaFo14	0.1031	1.7674	0.0583343
JaFo21	0.1054	1.4248	0.0739753
JaFo21	0.077	1.4845	0.0518693
JaFo21	0.1376	1.0722	0.128334
JaFo21	0.1167	2.0306	0.0574707
JaFo21	0.0616	0.9376	0.0656997
JaFo21	0.104	1.551	0.0670535
JaFo21	0.1074	2.1112	0.0508715
JaFo21	0.103	1.6643	0.0618879
JaFo21	0.105	1.5859	0.0662085
JaFo21	0.0816	1.4033	0.0581486
JaFo22	0.0828	1.5476	0.0535022
JaFo22	0.0738	1.3419	0.0549966
JaFo22	0.0925	1.9702	0.0469495
JaFo22	0.0525	1.5984	0.0328453
JaFo22	0.1122	2.0546	0.0546092
JaFo22	0.0788	1.6281	0.0484
JaFo22	0.2482	1.8267	0.135873
JaFo22	0.1185	1.8166	0.0652318
JaFo22	0.087	1.7556	0.0495557
JaFo22	0.0968	1.6059	0.0602777
JaFo23	0.0883	1.4439	0.0611538
JaFo23	0.0466	0.9611	0.0484861
JaFo23	0.1071	1.7425	0.0614634
JaFo23	0.1376	2.4545	0.0560603
JaFo23	0.0966	1.5708	0.0614973
JaFo23	0.1413	1.9905	0.0709872
JaFo23	0.1203	1.9948	0.0603068
JaFo23	0.1186	2.0068	0.0590991
JaFo23	0.1088	1.6986	0.0640527
JaFo23	0.1265	1.9867	0.0636734
JaFo24	0.0939	1.658	0.0566345
JaFo24	0.1214	2.2067	0.0550143
JaFo24	0.0743	2.0721	0.0358573
JaFo24	0.0849	1.6803	0.0505267
JaFo24	0.1012	2.0725	0.0488299
JaFo24	0.1179	2.3804	0.0495295
JaFo24	0.0842	1.7273	0.0487466
JaFo24	0.0944	2.039	0.0462972
JaFo24	0.057	1.1002	0.0518088
JaFo24	0.0555	1.3858	0.0400491
JaCa11	0.0695	1.1926	0.058276
JaCa11	0.1064	2.4737	0.0430125
JaCa11	0.1124	2.355	0.0477282
JaCa11	0.0844	1.3671	0.0617365
JaCa11	0.0936	1.7547	0.0533425
JaCa11	0.0383	1.0389	0.0368659
JaCa11	0.0763	1.5119	0.0504663
JaCa11	0.0529	0.7674	0.0689341
JaCa11	0.0682	0.6674	0.102188
JaCa11	0.06	0.8138	0.0737282
JaCa12	0.1609	2.4001	0.0670389
JaCa12	0.186	2.7999	0.0664309
JaCa12	0.1177	1.1853	0.0992998
JaCa12	0.1725	1.9077	0.090423
JaCa12	0.0799	1.0732	0.0744502
JaCa12	0.133	1.5956	0.0833542
JaCa12	0.2221	1.5287	0.145287
JaCa12	0.0737	1.5613	0.0472043
JaCa12	0.1341	1.2764	0.105061
JaCa12	0.1223	2.1605	0.0566073
JaCa13	0.1919	2.7559	0.0696324
JaCa13	0.1149	1.0464	0.109805
JaCa13	0.0912	1.525	0.0598033
JaCa13	0.2451	1.4482	0.169245
JaCa13	0.0555	1.4591	0.0380371
JaCa13	0.1594	1.4352	0.111065
JaCa13	0.2126	1.846	0.115168
JaCa13	0.0594	1.4329	0.0414544
JaCa13	0.0806	1.4233	0.056629
JaCa13	0.1083	1.6048	0.067485
JaCa14	0.0542	0.7483	0.0724308
JaCa14	0.0524	0.5377	0.0974521
JaCa14	0.0804	1.3913	0.0577877
JaCa14	0.0644	0.5689	0.113201
JaCa14	0.078	0.7262	0.107408
JaCa14	0.0503	0.6818	0.0737753
JaCa14	0.1504	1.6481	0.0912566
JaCa14	0.0601	0.9277	0.0647839
JaCa14	0.0648	0.6713	0.0965291
JaCa14	0.0591	0.7535	0.078434
JaCa21	0.1772	1.5784	0.112266
JaCa21	0.1684	2.6891	0.0626232
JaCa21	0.1213	1.4886	0.081486
JaCa21	0.1176	0.8212	0.143205
JaCa21	0.1114	1.6906	0.0658938
JaCa21	0.1024	1.1267	0.0908849
JaCa21	0.1772	1.0633	0.166651
JaCa21	0.2609	1.4172	0.184095
JaCa21	0.1844	1.8528	0.099525
JaCa21	0.1273	1.9808	0.064267
JaCa22	0.1318	1.6027	0.0822362
JaCa22	0.1551	2.6166	0.0592754
JaCa22	0.1613	2.5385	0.0635415
JaCa22	0.072	1.265	0.056917
JaCa22	0.1038	1.9143	0.0542235
JaCa22	0.1049	1.8609	0.0547981
JaCa22	0.1356	2.2814	0.072868
JaCa22	0.1276	1.8323	0.0559306
JaCa22	0.0736	1.2107	0.0401681
JaCa22	0.1162	1.8943	0.0959775
JaCa23	0.1531	2.7788	0.0808214
JaCa23	0.0754	1.1215	0.0672314
JaCa23	0.2035	2.3941	0.0850006
JaCa23	0.114	2.0756	0.0549239
JaCa23	0.2042	2.1249	0.0960986
JaCa23	0.1158	1.898	0.0610116
JaCa23	0.1534	2.6015	0.058966
JaCa23	0.1836	1.0392	0.176674
JaCa23	0.1929	1.2605	0.153035
JaCa23	0.096	1.3658	0.0702885
JaCa24	0.1346	2.323	0.0579423
JaCa24	0.1193	1.5835	0.0753394
JaCa24	0.1594	2.2953	0.0694463
JaCa24	0.147	2.2536	0.065229
JaCa24	0.1174	2.0872	0.0562476
JaCa24	0.4218	2.359	0.178805
JaCa24	0.1748	2.3141	0.0755369
JaCa24	0.0847	1.2342	0.0686275
JaCa24	0.0784	1.5539	0.0504537
JaCa24	0.1048	1.3966	0.0750394
AbAg11	0.1936	3.2051	0.0604037
AbAg11	0.0984	1.7168	0.0573159
AbAg11	0.1354	2.763	0.0490047
AbAg11	0.1005	1.5923	0.0631162
AbAg11	0.0998	1.9914	0.0501155
AbAg11	0.1286	2.3807	0.0540177
AbAg11	0.13	2.005	0.0648379
AbAg11	0.1086	1.736	0.0625576
AbAg11	0.1454	2.3386	0.062174
AbAg11	0.1058	1.3692	0.0772714
AbAg12	0.1837	4.4478	0.0413013
AbAg12	0.0908	2.2283	0.0407486
AbAg12	0.1451	2.4979	0.0580888
AbAg12	0.112	2.2779	0.0491681
AbAg12	0.0913	1.4509	0.0629265
AbAg12	0.1381	3.8008	0.0363345
AbAg12	0.1543	3.2107	0.0480581
AbAg12	0.0968	1.4451	0.066985
AbAg12	0.0989	1.7424	0.0567608
AbAg12	0.1124	2.7544	0.0408074
AbAg13	0.1488	3.1624	0.0470529
AbAg13	0.1457	2.943	0.0495073
AbAg13	0.2266	2.8043	0.0808045
AbAg13	0.17	3.3306	0.0510419
AbAg13	0.1324	2.871	0.0461163
AbAg13	0.1834	2.5866	0.0709039
AbAg13	0.1238	2.3331	0.0530624
AbAg13	0.0353	1.6768	0.021052
AbAg13	0.1421	3.119	0.0455595
AbAg13	0.1988	3.6645	0.0542502
AbAg14	0.0788	0.9255	0.0851432
AbAg14	0.1021	1.6239	0.0628733
AbAg14	0.0685	1.5178	0.0451311
AbAg14	0.1007	1.5794	0.0637584
AbAg14	0.127	2.0998	0.060482
AbAg14	0.0921	1.2904	0.0713732
AbAg14	0.0676	1.0552	0.0640637
AbAg14	0.0807	1.4132	0.0571044
AbAg14	0.0644	1.2198	0.0527955
AbAg14	0.1232	2.0592	0.0598291
AbAg21	0.1968	3.4222	0.0575069
AbAg21	0.1399	2.5508	0.0548455
AbAg21	0.123	2.2526	0.0546036
AbAg21	0.1144	1.462	0.078249
AbAg21	0.1145	2.0388	0.0561605
AbAg21	0.1531	2.5332	0.0604374
AbAg21	0.1547	3.7169	0.0416207
AbAg21	0.1064	1.8427	0.0577414
AbAg21	0.0846	1.4104	0.059983
AbAg21	0.1276	3.0149	0.0423231
AbAg22	0.1513	2.6912	0.0562203
AbAg22	0.1047	1.94	0.0539691
AbAg22	0.0786	1.4702	0.0534621
AbAg22	0.1168	2.0693	0.0564442
AbAg22	0.067	1.5111	0.0443386
AbAg22	0.2769	2.603	0.106377
AbAg22	0.1576	2.3004	0.0685098
AbAg22	0.1252	2.4968	0.0501442
AbAg22	0.0839	1.8262	0.0459424
AbAg22	0.1001	1.5375	0.0651057
AbAg23	0.0932	1.2488	0.0746316
AbAg23	0.1262	1.5949	0.0791272
AbAg23	0.0741	1.125	0.0658667
AbAg23	0.0999	1.8773	0.0532147
AbAg23	0.0743	1.4417	0.0515364
AbAg23	0.0623	1.3574	0.0458966
AbAg23	0.1495	1.7138	0.087233
AbAg23	0.1275	2.3529	0.0541884
AbAg23	0.0868	1.5448	0.0561885
AbAg23	0.1306	2.4676	0.0529259
AbAg24	0.0989	1.3965	0.0708199
AbAg24	0.1693	3.0626	0.0552798
AbAg24	0.1885	3.3512	0.0562485
AbAg24	0.1714	4.0578	0.0422396
AbAg24	0.1472	2.4218	0.0607812
AbAg24	0.1728	2.7373	0.0631279
AbAg24	0.1164	1.8266	0.063725
AbAg24	0.1286	2.6453	0.0486145
AbAg24	0.09	1.5534	0.0579374
AbAg24	0.1364	2.4209	0.0563427
AbVa11	0.0604	1.2542	0.0481582
AbVa11	0.0877	1.6175	0.0542195
AbVa11	0.0958	1.7625	0.0543546
AbVa11	0.0939	1.5713	0.0597594
AbVa11	0.0813	2.206	0.036854
AbVa11	0.0635	1.2067	0.0526229
AbVa11	0.0582	0.9228	0.0630689
AbVa11	0.0812	1.1713	0.0693247
AbVa11	0.0624	0.7353	0.0848633
AbVa11	0.0726	1.1174	0.0649723
AbVa12	0.0995	1.719	0.0578825
AbVa12	0.0895	1.7296	0.0517461
AbVa12	0.0793	0.9236	0.0858597
AbVa12	0.0716	1.7478	0.0409658
AbVa12	0.1245	2.1243	0.0586075
AbVa12	0.1084	1.847	0.0586898
AbVa12	0.1405	2.1055	0.06673
AbVa12	0.1079	2.2205	0.0485927
AbVa12	0.0766	1.4326	0.0534692
AbVa12	0.0677	1.3466	0.0502748
AbVa13	0.1368	2.3874	0.0573008
AbVa13	0.0829	2.1131	0.0392315
AbVa13	0.1284	2.0709	0.062002
AbVa13	0.0813	1.5998	0.0508189
AbVa13	0.105	1.6228	0.064703
AbVa13	0.1369	2.73	0.0501465
AbVa13	0.1102	1.3849	0.0795725
AbVa13	0.0836	1.661	0.0503311
AbVa13	0.1292	2.3446	0.0551053
AbVa13	0.1422	2.4768	0.0574128
AbVa14	0.1241	3.7033	0.0335107
AbVa14	0.1265	2.6422	0.0478768
AbVa14	0.1167	2.9772	0.0391979
AbVa14	0.1293	4.0504	0.0319228
AbVa14	0.1374	4.1856	0.0328268
AbVa14	0.1838	4.5535	0.0403646
AbVa14	0.0748	3.4359	0.0217701
AbVa14	0.1827	4.5576	0.0400869
AbVa14	0.1725	3.9437	0.0437406
AbVa14	0.1752	4.6728	0.0374936
AbVa21	0.1406	2.453	0.0573176
AbVa21	0.1045	1.3404	0.0779618
AbVa21	0.1859	2.3444	0.0792953
AbVa21	0.2194	2.525	0.0868911
AbVa21	0.0703	1.0184	0.0690299
AbVa21	0.3418	4.851	0.0704597
AbVa21	0.1475	1.5756	0.0936151
AbVa21	0.1562	1.7933	0.087102
AbVa21	0.1125	1.4964	0.0751804
AbVa21	0.0991	1.4751	0.0671819
AbVa22	0.05	0.7568	0.0660677
AbVa22	0.0557	1.1644	0.0478358
AbVa22	0.074	1.2562	0.0589078
AbVa22	0.0805	1.3914	0.0578554
AbVa22	0.0829	1.0848	0.0764196
AbVa22	0.0985	1.4184	0.0694444
AbVa22	0.0763	1.1159	0.0683753
AbVa22	0.0793	1.0504	0.075495
AbVa22	0.0748	1.1528	0.0648855
AbVa22	0.0625	0.7444	0.0839602
AbVa23	0.2833	5.2082	0.054395
AbVa23	0.1555	2.3567	0.0659821
AbVa23	0.1545	2.2731	0.0679689
AbVa23	0.1668	3.7865	0.0440512
AbVa23	0.1819	3.1258	0.0581931
AbVa23	0.1285	1.8477	0.0695459
AbVa23	0.1574	2.5033	0.062877
AbVa23	0.1037	2.0738	0.0500048
AbVa23	0.1918	2.0958	0.0915164
AbVa23	0.1828	2.2953	0.079641
AbVa24	0.2662	3.571	0.0745449
AbVa24	0.3041	4.8749	0.0623808
AbVa24	0.3386	7.3968	0.0457766
AbVa24	0.2607	3.861	0.0675214
AbVa24	0.2349	3.8337	0.0612724
AbVa24	0.2717	4.243	0.0640349
AbVa24	0.284	3.0097	0.0943616
AbVa24	0.2344	3.8555	0.0607963
AbVa24	0.204	3.7994	0.0536927
AbVa24	0.2601	3.438	0.0756545
AbCm11	0.1039	1.5506	0.0670063
AbCm11	0.0985	1.8525	0.0531714
AbCm11	0.0793	1.3704	0.0578663
AbCm11	0.0927	1.7511	0.0529382
AbCm11	0.1146	1.4744	0.0777265
AbCm11	0.0805	1.4178	0.0567781
AbCm11	0.0983	1.673	0.0587567
AbCm11	0.0883	1.4275	0.0618564
AbCm11	0.1206	2.3783	0.0507085
AbCm11	0.15	2.6155	0.0573504
AbCm12	0.0967	1.219	0.0793273
AbCm12	0.0902	2.0992	0.0429688
AbCm12	0.1511	1.1511	0.131266
AbCm12	0.0745	1.5316	0.0486419
AbCm12	0.0938	2.0464	0.0458366
AbCm12	0.0818	1.4978	0.0546134
AbCm12	0.0521	0.8693	0.0599333
AbCm12	0.0706	1.0136	0.0696527
AbCm12	0.0587	0.8803	0.0666818
AbCm12	0.063	1.1093	0.0567926
AbCm13	0.0548	0.9791	0.0559698
AbCm13	0.0505	0.9397	0.0537406
AbCm13	0.05	1.0336	0.0483746
AbCm13	0.0556	1.2178	0.0456561
AbCm13	0.0634	1.3068	0.0485155
AbCm13	0.0578	1.1422	0.0506041
AbCm13	0.0506	1.0108	0.0500594
AbCm13	0.0561	1.0008	0.0560552
AbCm13	0.0426	0.8343	0.0510608
AbCm13	0.0455	0.7587	0.059971
AbCm14	0.0543	0.7326	0.0741196
AbCm14	0.0863	1.4191	0.0608132
AbCm14	0.0748	1.3168	0.0568044
AbCm14	0.064	0.9934	0.0644252
AbCm14	0.0606	0.944	0.0641949
AbCm14	0.0681	1.1373	0.0598787
AbCm14	0.1183	1.4207	0.0832688
AbCm14	0.0853	1.2416	0.0687017
AbCm14	0.0839	1.1821	0.0709754
AbCm14	0.0662	0.9487	0.0697797
AbCm21	0.2135	3.322	0.0642685
AbCm21	0.1592	2.7407	0.0580873
AbCm21	0.179	3.1724	0.0564242
AbCm21	0.1002	1.6535	0.0605987
AbCm21	0.185	2.4267	0.0762352
AbCm21	0.1955	3.3044	0.0591635
AbCm21	0.1084	1.2869	0.0842334
AbCm21	0.1856	3.1911	0.0581618
AbCm21	0.1449	3.1581	0.045882
AbCm21	0.1529	2.4177	0.0632419
AbCm22	0.0723	1.1405	0.0633932
AbCm22	0.0647	1.1793	0.0548631
AbCm22	0.0497	0.8142	0.0610415
AbCm22	0.0723	1.2608	0.0573445
AbCm22	0.0566	1.1126	0.0508718
AbCm22	0.0604	1.2132	0.0497857
AbCm22	0.0651	1.2468	0.0522137
AbCm22	0.0728	1.3662	0.0532865
AbCm22	0.059	1.1336	0.0520466
AbCm22	0.0683	1.1954	0.0571357
AbCm23	0.0187	0.5181	0.0360934
AbCm23	0.0275	0.4884	0.0563063
AbCm23	0.0236	0.5168	0.0456656
AbCm23	0.0312	0.6661	0.0468398
AbCm23	0.0387	0.6112	0.0633181
AbCm23	0.0226	0.7406	0.0305158
AbCm23	0.0239	0.5452	0.0438371
AbCm23	0.0258	0.434	0.059447
AbCm23	0.0187	0.4307	0.0434177
AbCm23	0.0226	0.4181	0.0540541
AbCm24	0.0607	0.8432	0.0719877
AbCm24	0.0355	0.7654	0.046381
AbCm24	0.0555	1.0134	0.0547661
AbCm24	0.0571	1.232	0.0463474
AbCm24	0.0393	0.8997	0.0436812
AbCm24	0.0714	1.1089	0.0643881
AbCm24	0.0545	1.0737	0.0507591
AbCm24	0.0613	1.2659	0.048424
AbCm24	0.0518	1.123	0.0461264
AbCm24	0.0497	1.0683	0.0465225
AbMo11	0.0728	1.4043	0.0518408
AbMo11	0.0535	1.1458	0.0466923
AbMo11	0.0804	1.6451	0.0488724
AbMo11	0.0629	1.4185	0.0443426
AbMo11	0.0636	1.1816	0.0538253
AbMo11	0.085	1.4242	0.0596826
AbMo11	0.0578	1.2078	0.0478556
AbMo11	0.0554	0.8453	0.0655389
AbMo11	0.0581	1.1892	0.0488564
AbMo11	0.068	1.4341	0.0474165
AbMo12	0.1341	2.9168	0.045975
AbMo12	0.0892	1.9269	0.046292
AbMo12	0.1719	3.3207	0.0517662
AbMo12	0.152	3.4614	0.0439129
AbMo12	0.0941	1.7067	0.0551356
AbMo12	0.1334	1.923	0.0693708
AbMo12	0.0985	1.3932	0.0707005
AbMo12	0.1362	3.226	0.0422195
AbMo12	0.14	2.7487	0.0509332
AbMo12	0.0855	1.2875	0.0664078
AbMo13	0.0368	1.0055	0.0365987
AbMo13	0.0624	1.7424	0.0358127
AbMo13	0.0546	1.1706	0.0466427
AbMo13	0.0534	1.3353	0.039991
AbMo13	0.034	1.3039	0.0260756
AbMo13	0.0551	1.6234	0.0339411
AbMo13	0.0595	1.5095	0.039417
AbMo13	0.0672	1.668	0.0402878
AbMo13	0.0527	1.3149	0.0400791
AbMo13	0.0458	1.3067	0.0350501
AbMo14	0.0749	1.1552	0.0648373
AbMo14	0.0489	1.1106	0.0440303
AbMo14	0.0589	1.1917	0.0494252
AbMo14	0.095	1.2506	0.0759635
AbMo14	0.0548	1.3583	0.0403445
AbMo14	0.0655	1.6306	0.0401693
AbMo14	0.0679	1.7044	0.0398381
AbMo14	0.0473	1.3964	0.0338728
AbMo14	0.0501	1.121	0.0446922
AbMo14	0.0577	1.2595	0.0458118
AbMo21	0.077	1.4101	0.0546061
AbMo21	0.073	1.3351	0.0546776
AbMo21	0.0756	1.7494	0.0432148
AbMo21	0.0686	1.4272	0.0480661
AbMo21	0.0781	1.6585	0.0470907
AbMo21	0.0869	1.8693	0.046488
AbMo21	0.0903	1.8068	0.0499779
AbMo21	0.0783	1.8075	0.0433195
AbMo21	0.103	2.381	0.0432591
AbMo21	0.1351	1.8329	0.0737083
AbMo22	0.0596	1.5824	0.0376643
AbMo22	0.0689	1.3296	0.0518201
AbMo22	0.0616	1.21	0.0509091
AbMo22	0.077	1.3351	0.0576736
AbMo22	0.0684	1.3688	0.0499708
AbMo22	0.0519	1.1828	0.0438789
AbMo22	0.0778	1.5665	0.0496649
AbMo22	0.0866	1.4776	0.0586086
AbMo22	0.0571	1.3899	0.0410821
AbMo22	0.0528	1.0751	0.0491117
AbMo23	0.0577	1.047	0.0551098
AbMo23	0.0617	0.9755	0.0632496
AbMo23	0.0416	1.027	0.0405063
AbMo23	0.0682	0.8228	0.0828877
AbMo23	0.0419	0.771	0.054345
AbMo23	0.0632	1.4866	0.0425131
AbMo23	0.0893	1.9494	0.045809
AbMo23	0.0758	1.8282	0.0414615
AbMo23	0.0428	1.1469	0.037318
AbMo23	0.0507	1.4714	0.034457
AbMo24	0.0699	1.385	0.0504693
AbMo24	0.0597	1.1197	0.0533179
AbMo24	0.1077	2.3351	0.0461222
AbMo24	0.0846	1.4567	0.0580765
AbMo24	0.072	1.6308	0.0441501
AbMo24	0.1397	3.2527	0.0429489
AbMo24	0.1013	1.8084	0.0560164
AbMo24	0.0911	2.2851	0.039867
AbMo24	0.0633	1.2983	0.0487561
AbMo24	0.0702	1.397	0.0502505
AbFo11	0.1395	1.6796	0.0830555
AbFo11	0.0716	1.0338	0.069259
AbFo11	0.0687	1.6756	0.0410002
AbFo11	0.1283	1.5933	0.0805247
AbFo11	0.0717	1.5234	0.0470658
AbFo11	0.0892	1.1927	0.0747883
AbFo11	0.089	1.2318	0.072252
AbFo11	0.1013	0.9361	0.108215
AbFo11	0.0755	1.2271	0.0615272
AbFo11	0.0767	1.417	0.0541284
AbFo12	0.0753	1.2999	0.0579275
AbFo12	0.1279	2.2344	0.0572413
AbFo12	0.0848	1.3522	0.0627126
AbFo12	0.0846	0.6012	0.140719
AbFo12	0.0895	1.5045	0.0594882
AbFo12	0.1958	2.1069	0.0929327
AbFo12	0.1206	1.4795	0.081514
AbFo12	0.138	1.9684	0.0701077
AbFo12	0.1077	1.5954	0.0675066
AbFo12	0.0259	0.367	0.0705722
AbFo13	0.0767	1.3193	0.0581369
AbFo13	0.0629	1.0832	0.0580687
AbFo13	0.0609	1.4679	0.0414878
AbFo13	0.1396	0.9145	0.152652
AbFo13	0.1039	1.8941	0.0548545
AbFo13	0.0712	0.9157	0.0777547
AbFo13	0.055	1.2844	0.0428216
AbFo13	0.0719	1.1559	0.0622026
AbFo13	0.0904	1.0199	0.0886361
AbFo13	0.0625	0.95	0.0657895
AbFo14	0.161	2.6135	0.0616032
AbFo14	0.2611	3.1566	0.0827156
AbFo14	0.1908	2.8124	0.0678424
AbFo14	0.1094	1.3724	0.0797144
AbFo14	0.2163	2.7397	0.0789503
AbFo14	0.1747	2.6642	0.0655732
AbFo14	0.192	2.7825	0.0690027
AbFo14	0.131	1.9051	0.0687628
AbFo14	0.2484	3.0724	0.0808488
AbFo14	0.187	2.1199	0.0882117
AbFo21	0.079	0.7235	0.109191
AbFo21	0.0509	0.9089	0.0560018
AbFo21	0.0437	0.8403	0.0520052
AbFo21	0.0334	0.9532	0.0350399
AbFo21	0.0741	1.1728	0.0631821
AbFo21	0.12	0.8253	0.145402
AbFo21	0.0412	0.9684	0.0425444
AbFo21	0.0657	0.9247	0.0710501
AbFo21	0.0537	0.9748	0.0550882
AbFo21	0.0529	0.9207	0.0574563
AbFo22	0.0785	1.3426	0.0584686
AbFo22	0.0807	1.2377	0.0652016
AbFo22	0.0453	0.7954	0.0569525
AbFo22	0.0645	0.9857	0.0654357
AbFo22	0.0665	0.9898	0.0671853
AbFo22	0.085	0.9792	0.0868056
AbFo22	0.0496	0.7619	0.0651004
AbFo22	0.0633	0.9845	0.0642966
AbFo22	0.0672	1.0772	0.062384
AbFo22	0.0539	0.9346	0.0576717
AbFo23	0.073	1.066	0.0684803
AbFo23	0.1214	1.8525	0.0655331
AbFo23	0.0608	0.9218	0.0659579
AbFo23	0.11	1.5357	0.0716286
AbFo23	0.0836	1.4603	0.0572485
AbFo23	0.0864	1.1496	0.0751566
AbFo23	0.0725	1.2651	0.0573077
AbFo23	0.0803	1.3202	0.0608241
AbFo23	0.1146	1.7899	0.0640259
AbFo23	0.0919	1.6093	0.0571056
AbFo24	0.1199	1.9635	0.0610644
AbFo24	0.1393	2.421	0.0575382
AbFo24	0.1504	2.0953	0.0717797
AbFo24	0.1084	2.1503	0.0504116
AbFo24	0.1484	1.69	0.0878107
AbFo24	0.1531	1.6151	0.0947929
AbFo24	0.1589	2.8568	0.0556217
AbFo24	0.1311	1.4675	0.0893356
AbFo24	0.1565	2.0652	0.0757796
AbFo24	0.1355	1.8349	0.073846
AbCa11	0.0651	1.1178	0.0582394
AbCa11	0.0722	1.3286	0.0543429
AbCa11	0.0738	1.3117	0.0562629
AbCa11	0.0787	1.665	0.0472673
AbCa11	0.0759	1.2952	0.058601
AbCa11	0.0735	1.4242	0.0516079
AbCa11	0.089	1.3857	0.0642275
AbCa11	0.0754	1.489	0.050638
AbCa11	0.0929	1.7456	0.0532195
AbCa11	0.154	1.9016	0.0809844
AbCa12	0.0606	1.0001	0.0605939
AbCa12	0.0666	0.8722	0.0763586
AbCa12	0.1202	1.642	0.0732034
AbCa12	0.0881	1.5526	0.0567435
AbCa12	0.1543	2.9651	0.0520387
AbCa12	0.0592	0.82	0.0721951
AbCa12	0.1072	1.393	0.0769562
AbCa12	0.0795	1.4775	0.0538071
AbCa12	0.11	1.7029	0.0645957
AbCa12	0.0583	0.7592	0.0767914
AbCa13	0.1284	1.4152	0.0907292
AbCa13	0.0865	1.2809	0.0675306
AbCa13	0.1149	1.7606	0.0652618
AbCa13	0.0972	1.7428	0.0557723
AbCa13	0.0796	0.9074	0.0877232
AbCa13	0.1391	1.4353	0.0969135
AbCa13	0.102	1.4658	0.0695866
AbCa13	0.0592	0.9471	0.0625066
AbCa13	0.1063	1.0608	0.100207
AbCa13	0.1138	1.4702	0.0774044
AbCa14	0.0828	1.3236	0.0625567
AbCa14	0.1226	1.3379	0.0916361
AbCa14	0.1454	1.4862	0.0978334
AbCa14	0.2532	1.3581	0.186437
AbCa14	0.0874	1.3288	0.0657736
AbCa14	0.1201	1.4733	0.0815177
AbCa14	0.1054	1.7216	0.0612221
AbCa14	0.072	0.9475	0.0759894
AbCa14	0.0926	0.9924	0.0933091
AbCa14	0.1093	1.8674	0.0585306
AbCa21	0.0799	1.5638	0.0510935
AbCa21	0.0982	1.6222	0.0605351
AbCa21	0.0832	1.7596	0.0472835
AbCa21	0.0834	1.1939	0.0698551
AbCa21	0.0933	1.4525	0.0642341
AbCa21	0.0964	1.4992	0.064301
AbCa21	0.0565	0.9519	0.059355
AbCa21	0.0972	2.0264	0.0479668
AbCa21	0.0601	1.3193	0.0455545
AbCa21	0.0869	1.5841	0.0548576
AbCa22	0.0975	1.2573	0.0775471
AbCa22	0.0981	1.2989	0.0755254
AbCa22	0.0876	1.5196	0.0576467
AbCa22	0.0772	1.1209	0.0688732
AbCa22	0.1579	2.1177	0.074562
AbCa22	0.1044	1.7286	0.0603957
AbCa22	0.1107	1.7665	0.0626663
AbCa22	0.1083	1.5473	0.0699929
AbCa22	0.1037	1.742	0.0595293
AbCa22	0.1177	2.4446	0.0481469
AbCa23	0.1864	1.2097	0.154088
AbCa23	0.0739	1.5621	0.0473081
AbCa23	0.1627	1.6607	0.0979707
AbCa23	0.1249	2.3963	0.052122
AbCa23	0.1349	1.8849	0.0715688
AbCa23	0.0742	1.2273	0.0604579
AbCa23	0.0878	1.5391	0.0570463
AbCa23	0.1296	1.5798	0.0820357
AbCa23	0.0852	1.66	0.0513253
AbCa23	0.0916	1.5826	0.0578794
AbCa24	0.1548	1.4966	0.103434
AbCa24	0.111	1.7696	0.062726
AbCa24	0.1272	1.8559	0.0685382
AbCa24	0.1167	2.2462	0.0519544
AbCa24	0.0891	1.5939	0.0559006
AbCa24	0.1154	2.2611	0.0510371
AbCa24	0.0728	1.2265	0.0593559
AbCa24	0.1303	3.0899	0.0421696
AbCa24	0.1347	2.4472	0.0550425
AbCa24	0.1656	1.9763	0.0837929
			#DIV/0!
JuAg11	0.1013	1.4352	0.0705825
JuAg11	0.1248	2.4744	0.0504365
JuAg11	0.0697	0.9206	0.0757115
JuAg11	0.1048	1.4625	0.0716581
JuAg11	0.0898	1.255	0.0715538
JuAg11	0.1342	1.8212	0.0736877
JuAg11	0.1587	2.204	0.0720054
JuAg11	0.1806	2.6624	0.0678335
JuAg11	0.1049	1.5631	0.0671102
JuAg11	0.1306	2.1036	0.062084
JuAg12	0.2276	3.4808	0.0653873
JuAg12	0.1516	2.1053	0.0720087
JuAg12	0.078	1.0839	0.0719624
JuAg12	0.0994	1.3526	0.0734881
JuAg12	0.0917	1.2651	0.0724844
JuAg12	0.0848	1.6275	0.0521045
JuAg12	0.2238	1.5684	0.142693
JuAg12	0.1692	3.2823	0.0515492
JuAg12	0.0863	1.3381	0.0644944
JuAg12	0.142	2.2533	0.0630187
JuAg13	0.0835	1.408	0.059304
JuAg13	0.1196	2.1286	0.0561872
JuAg13	0.0819	1.2699	0.0644933
JuAg13	0.1335	1.8365	0.0726926
JuAg13	0.1437	1.9201	0.0748399
JuAg13	0.1324	1.8781	0.0704968
JuAg13	0.0798	1.1078	0.0720347
JuAg13	0.1118	1.38	0.0810145
JuAg13	0.098	1.6217	0.0604304
JuAg13	0.096	1.281	0.0749415
JuAg14	0.0878	1.5753	0.0557354
JuAg14	0.0395	0.7179	0.0550216
JuAg14	0.0534	1.374	0.0388646
JuAg14	0.0788	1.6087	0.0489837
JuAg14	0.0696	1.5739	0.0442214
JuAg14	0.0709	1.2884	0.0550295
JuAg14	0.0865	1.1792	0.0733548
JuAg14	0.0527	0.8175	0.0644648
JuAg14	0.0611	1.2329	0.049558
JuAg14	0.112	1.8374	0.0609557
JuAg21	0.1364	1.9657	0.06939
JuAg21	0.0791	1.5944	0.0496111
JuAg21	0.1097	1.6577	0.066176
JuAg21	0.1442	3.2678	0.0441275
JuAg21	0.0859	1.801	0.0476957
JuAg21	0.1971	2.5976	0.0758777
JuAg21	0.0782	1.0128	0.0772117
JuAg21	0.2433	4.7144	0.0516078
JuAg21	0.0939	1.8059	0.0519962
JuAg21	0.2062	1.4004	0.147244
JuAg22	0.0547	1.4602	0.0374606
JuAg22	0.0705	1.0738	0.0656547
JuAg22	0.1366	2.0707	0.065968
JuAg22	0.1019	2.0099	0.050699
JuAg22	0.1626	1.9026	0.085462
JuAg22	0.1304	2.0469	0.0637061
JuAg22	0.0659	1.0347	0.06369
JuAg22	0.0744	0.8728	0.0852429
JuAg22	0.1306	2.2089	0.0591245
JuAg22	0.1213	1.6932	0.0716395
JuAg23	0.0671	1.1029	0.0608396
JuAg23	0.0733	1.5783	0.0464424
JuAg23	0.0651	1.2306	0.052901
JuAg23	0.0707	1.195	0.0591632
JuAg23	0.1131	2.0349	0.0555801
JuAg23	0.1282	2.8183	0.0454884
JuAg23	0.0936	1.4212	0.0658598
JuAg23	0.1478	3.0965	0.0477313
JuAg23	0.0822	1.5868	0.0518024
JuAg23	0.1368	2.2603	0.0605229
JuAg24	0.0839	1.8564	0.045195
JuAg24	0.0962	1.6926	0.0568356
JuAg24	0.1023	1.3543	0.0755372
JuAg24	0.0539	0.7222	0.0746331
JuAg24	0.0733	1.4113	0.0519379
JuAg24	0.068	0.9623	0.070664
JuAg24	0.0522	0.8639	0.0604237
JuAg24	0.0755	1.0433	0.0723665
JuAg24	0.0514	0.8727	0.0588977
JuAg24	0.0383	0.884	0.0433258
JuVa11	0.1106	1.2717	0.0869702
JuVa11	0.1316	1.9196	0.0685559
JuVa11	0.091	1.0785	0.0843764
JuVa11	0.1095	1.5678	0.0698431
JuVa11	0.1328	2.0224	0.0656646
JuVa11	0.0841	1.4591	0.0576383
JuVa11	0.0897	1.2708	0.0705855
JuVa11	0.0982	1.198	0.0819699
JuVa11	0.0902	1.3388	0.0673738
JuVa11	0.0578	0.9132	0.0632939
JuVa12	0.0504	0.8023	0.0628194
JuVa12	0.0576	0.7307	0.0788285
JuVa12	0.066	1.3191	0.0500341
JuVa12	0.0687	0.9074	0.0757108
JuVa12	0.0449	0.9145	0.0490979
JuVa12	0.0538	0.9479	0.056757
JuVa12	0.0673	0.8858	0.0759765
JuVa12	0.0574	0.9108	0.0630215
JuVa12	0.0544	0.9277	0.0586396
JuVa12	0.0342	1.2023	0.0284455
JuVa13	0.0927	1.2058	0.0768784
JuVa13	0.0718	1.2759	0.056274
JuVa13	0.0888	1.2764	0.0695707
JuVa13	0.0741	0.8911	0.0831557
JuVa13	0.0798	1.0178	0.0784044
JuVa13	0.0533	0.6525	0.0816858
JuVa13	0.0471	0.6539	0.0720294
JuVa13	0.0621	1.059	0.0586402
JuVa13	0.0712	1.1267	0.0631934
JuVa13	0.087	0.99	0.0878788
JuVa14	0.0609	0.6053	0.100611
JuVa14	0.0731	1.1076	0.0659986
JuVa14	0.0845	1.0617	0.0795893
JuVa14	0.0659	0.9228	0.0714131
JuVa14	0.0806	1.2963	0.062177
JuVa14	0.07	1.2913	0.0542089
JuVa14	0.0983	0.8843	0.111161
JuVa14	0.0711	0.7984	0.0890531
JuVa14	0.0428	0.5948	0.071957
JuVa14	0.0546	0.7793	0.0700629
JuVa21	0.0465	0.6115	0.0760425
JuVa21	0.0597	0.7488	0.0797276
JuVa21	0.0464	1.1438	0.0405665
JuVa21	0.0491	0.706	0.0695467
JuVa21	0.0615	0.8756	0.0702376
JuVa21	0.1111	1.0106	0.109935
JuVa21	0.043	0.5704	0.0753857
JuVa21	0.0586	0.8602	0.0681237
JuVa21	0.0289	1.9547	0.0147849
JuVa21	0.0485	0.9007	0.053847
JuVa22	0.0545	0.9677	0.0563191
JuVa22	0.0694	0.8839	0.0785157
JuVa22	0.1062	1.6598	0.0639836
JuVa22	0.0514	0.7571	0.0678906
JuVa22	0.0521	0.7965	0.0654112
JuVa22	0.056	0.7741	0.0723421
JuVa22	0.047	0.58	0.0810345
JuVa22	0.052	0.8647	0.0601365
JuVa22	0.0331	0.503	0.0658052
JuVa22	0.0453	0.526	0.0861217
JuVa23	0.041	0.8783	0.0466811
JuVa23	0.0851	1.3488	0.0630931
JuVa23	0.0744	1.3129	0.0566684
JuVa23	0.0837	1.6657	0.0502491
JuVa23	0.0466	0.7737	0.0602301
JuVa23	0.0734	0.8434	0.0870287
JuVa23	0.0508	1.1344	0.0447814
JuVa23	0.1653	3.4294	0.0482009
JuVa23	0.0776	1.1704	0.0663021
JuVa23	0.0685	1.2544	0.0546078
JuVa24	0.0646	0.8758	0.0737611
JuVa24	0.0416	0.7089	0.0586825
JuVa24	0.0938	1.5513	0.0604654
JuVa24	0.1082	1.932	0.0560041
JuVa24	0.0814	1.3271	0.0613367
JuVa24	0.0589	0.7862	0.0749173
JuVa24	0.0536	0.7533	0.0711536
JuVa24	0.0383	0.6929	0.0552749
JuVa24	0.0484	0.6647	0.0728148
JuVa24	0.0596	1.1304	0.0527247
JuCm11	0.0538	0.7642	0.0704004
JuCm11	0.0726	1.007	0.0720953
JuCm11	0.0748	0.9849	0.0759468
JuCm11	0.0673	0.9648	0.0697554
JuCm11	0.0892	0.9207	0.0968828
JuCm11	0.0589	0.8434	0.0698364
JuCm11	0.062	0.8712	0.0711662
JuCm11	0.0693	0.9623	0.072015
JuCm11	0.0767	1.0513	0.0729573
JuCm11	0.1014	1.1802	0.0859176
JuCm12	0.0346	0.8246	0.0419597
JuCm12	0.04	0.5913	0.0676476
JuCm12	0.0479	0.9104	0.0526142
JuCm12	0.0658	1.078	0.061039
JuCm12	0.0478	0.6373	0.0750039
JuCm12	0.0493	0.69	0.0714493
JuCm12	0.0416	0.4593	0.0905726
JuCm12	0.0308	0.5575	0.0552466
JuCm12	0.0618	0.7292	0.0847504
JuCm12	0.0444	0.6947	0.0639125
JuCm13	0.0919	1.2505	0.0734906
JuCm13	0.1186	1.4726	0.0805378
JuCm13	0.1318	1.39	0.0948201
JuCm13	0.0818	1.024	0.0798828
JuCm13	0.0938	1.1295	0.0830456
JuCm13	0.0909	1.3578	0.0669465
JuCm13	0.0798	1.411	0.0565556
JuCm13	0.068	1.1527	0.0589919
JuCm13	0.1062	1.4882	0.0713614
JuCm13	0.1008	1.2686	0.0794577
JuCm14	0.0965	0.926	0.104212
JuCm14	0.1959	1.1106	0.176391
JuCm14	0.1023	1.0607	0.0964457
JuCm14	0.1208	1.4433	0.0836971
JuCm14	0.0866	0.9987	0.0867127
JuCm14	0.0736	1.0707	0.0687401
JuCm14	0.09	1.0639	0.0845944
JuCm14	0.0351	0.6768	0.0518617
JuCm14	0.0593	0.788	0.0752538
JuCm14	0.0666	1.144	0.0582168
JuCm21	0.0345	0.5661	0.0609433
JuCm21	0.0338	0.7098	0.047619
JuCm21	0.0383	0.7408	0.0517009
JuCm21	0.035	0.5224	0.0669985
JuCm21	0.0843	0.462	0.182468
JuCm21	0.0327	0.5264	0.0621201
JuCm21	0.0362	0.6678	0.0542078
JuCm21	0.0379	0.593	0.0639123
JuCm21	0.0421	0.7716	0.0545619
JuCm21	0.0452	0.6771	0.0667553
JuCm22	0.0665	0.9888	0.0672532
JuCm22	0.0274	0.3487	0.0785776
JuCm22	0.0318	0.4659	0.068255
JuCm22	0.0416	0.7144	0.0582307
JuCm22	0.0345	1.0063	0.034284
JuCm22	0.0217	0.3385	0.0641064
JuCm22	0.0288	0.4329	0.0665281
JuCm22	0.0504	1.0836	0.0465116
JuCm22	0.0352	0.5908	0.0595802
JuCm22	0.0366	0.5319	0.0688099
JuCm23	0.0632	1.0536	0.0599848
JuCm23	0.0402	0.6341	0.0633969
JuCm23	0.0654	0.8891	0.0735575
JuCm23	0.0509	0.9292	0.0547783
JuCm23	0.0971	1.3534	0.0717452
JuCm23	0.1145	1.5193	0.0753637
JuCm23	0.0622	0.8769	0.0709317
JuCm23	0.0508	0.523	0.0971319
JuCm23	0.065	0.8353	0.0778164
JuCm23	0.0568	0.888	0.063964
JuCm24	0.0333	0.7507	0.0443586
JuCm24	0.0613	0.7811	0.0784791
JuCm24	0.0479	0.6954	0.0688812
JuCm24	0.0542	0.9986	0.054276
JuCm24	0.0525	0.9636	0.0544832
JuCm24	0.0439	0.7139	0.0614932
JuCm24	0.0644	0.8121	0.0793006
JuCm24	0.044	0.5695	0.0772608
JuCm24	0.051	0.6521	0.0782089
JuCm24	0.0351	0.5186	0.0676822
JuMo11	0.0842	1.5225	0.0553038
JuMo11	0.074	1.3591	0.0544478
JuMo11	0.0879	1.3528	0.0649763
JuMo11	0.0749	1.2037	0.0622248
JuMo11	0.0723	1.3492	0.0535873
JuMo11	0.0744	1.5491	0.0480279
JuMo11	0.125	1.6014	0.0780567
JuMo11	0.1418	2.4779	0.0572259
JuMo11	0.137	2.3777	0.0576187
JuMo11	0.0818	1.447	0.0565308
JuMo12	0.0877	1.4218	0.0616824
JuMo12	0.1096	1.101	0.0995459
JuMo12	0.094	1.7371	0.0541132
JuMo12	0.1048	1.9225	0.0545124
JuMo12	0.0528	1.1158	0.0473203
JuMo12	0.0885	1.5211	0.0581816
JuMo12	0.0732	0.9407	0.0778144
JuMo12	0.0712	1.3276	0.0536306
JuMo12	0.075	1.5788	0.0475044
JuMo12	0.0717	1.5658	0.0457913
JuMo13	0.0406	0.5494	0.0738988
JuMo13	0.0728	1.0644	0.0683953
JuMo13	0.0306	0.4085	0.0749082
JuMo13	0.04	0.5913	0.0676476
JuMo13	0.0486	0.5149	0.0943873
JuMo13	0.0403	0.5584	0.0721705
JuMo13	0.0333	0.4644	0.0717054
JuMo13	0.0803	0.697	0.115208
JuMo13	0.0542	0.7031	0.0770872
JuMo13	0.0523	0.8276	0.0631948
JuMo14	0.0564	1.2893	0.0437447
JuMo14	0.0465	1.0565	0.0440133
JuMo14	0.0621	1.2581	0.0493601
JuMo14	0.0505	1.23	0.0410569
JuMo14	0.0766	2.0041	0.0382216
JuMo14	0.0496	0.8898	0.0557429
JuMo14	0.0585	1.2974	0.0450902
JuMo14	0.0529	1.1419	0.0463263
JuMo14	0.0678	1.8699	0.0362586
JuMo14	0.0772	1.3938	0.0553881
JuMo21	0.1043	1.603	0.0650655
JuMo21	0.1365	2.1215	0.0643413
JuMo21	0.1236	2.0328	0.0608028
JuMo21	0.1575	2.7307	0.0576775
JuMo21	0.1699	2.3567	0.0720923
JuMo21	0.1323	1.1492	0.115124
JuMo21	0.2049	3.6244	0.0565335
JuMo21	0.1411	1.9097	0.073886
JuMo21	0.1704	2.5981	0.0655864
JuMo21	0.1238	1.5885	0.0779352
JuMo22	0.1179	1.4723	0.0800788
JuMo22	0.1107	1.5706	0.0704826
JuMo22	0.1197	1.7547	0.0682168
JuMo22	0.1226	1.969	0.0622651
JuMo22	0.093	1.2025	0.0773389
JuMo22	0.1108	1.7436	0.0635467
JuMo22	0.1364	2.4721	0.0551758
JuMo22	0.1045	1.3833	0.075544
JuMo22	0.1133	1.7895	0.0633138
JuMo22	0.1749	3.0042	0.0582185
JuMo23	0.1017	1.7442	0.0583075
JuMo23	0.1142	2.3255	0.0491077
JuMo23	0.1136	1.9554	0.0580955
JuMo23	0.0795	1.3012	0.0610974
JuMo23	0.1164	1.6737	0.0695465
JuMo23	0.0768	0.9013	0.0852103
JuMo23	0.1074	1.8602	0.0577357
JuMo23	0.1124	1.5088	0.0744963
JuMo23	0.0935	1.294	0.0722566
JuMo23	0.0941	1.6107	0.0584218
JuMo24	0.081	1.1861	0.068291
JuMo24	0.067	0.9141	0.0732961
JuMo24	0.056	0.9795	0.057172
JuMo24	0.0522	0.8854	0.0589564
JuMo24	0.065	0.9834	0.0660972
JuMo24	0.0929	1.1383	0.0816129
JuMo24	0.1008	1.1736	0.0858896
JuMo24	0.0874	1.362	0.0641703
JuMo24	0.0738	0.9544	0.0773261
JuMo24	0.0602	1.0275	0.0585888
JuFo11	0.1594	1.8599	0.0857035
JuFo11	0.1432	2.0354	0.0703547
JuFo11	0.1113	2.2747	0.0489295
JuFo11	0.1153	1.4109	0.0817209
JuFo11	0.1518	2.3464	0.0646949
JuFo11	0.1314	1.855	0.0708356
JuFo11	0.1492	2.1526	0.0693115
JuFo11	0.0919	1.5633	0.0587859
JuFo11	0.1449	1.799	0.0805447
JuFo11	0.1758	2.2971	0.0765313
JuFo12	0.1501	2.1715	0.0691227
JuFo12	0.1426	2.0642	0.0690825
JuFo12	0.1278	1.7982	0.0710711
JuFo12	0.1464	1.9016	0.0769878
JuFo12	0.2046	2.7531	0.0743162
JuFo12	0.171	2.5348	0.0674609
JuFo12	0.1085	1.7339	0.0625757
JuFo12	0.1162	1.9565	0.0593918
JuFo12	0.1552	2.2722	0.0683038
JuFo12	0.1219	1.4726	0.0827788
JuFo13	0.1208	1.9069	0.0633489
JuFo13	0.1127	2.0908	0.0539028
JuFo13	0.143	2.0918	0.0683622
JuFo13	0.1157	1.5585	0.074238
JuFo13	0.121	1.7621	0.0686681
JuFo13	0.114	1.935	0.0589147
JuFo13	0.177	2.8173	0.0628261
JuFo13	0.139	1.9722	0.0704797
JuFo13	0.1629	2.3364	0.0697227
JuFo13	0.1306	2.1972	0.0594393
JuFo14	0.0868	1.1771	0.0737405
JuFo14	0.0777	1.0384	0.0748267
JuFo14	0.0762	0.9043	0.0842641
JuFo14	0.0999	1.2487	0.0800032
JuFo14	0.0839	1.3431	0.0624674
JuFo14	0.0809	1.6512	0.0489947
JuFo14	0.091	1.2185	0.074682
JuFo14	0.0929	1.1565	0.0803286
JuFo14	0.111	1.4905	0.0744717
JuFo14	0.0815	1.1246	0.0724702
JuFo21	0.0808	1.1644	0.069392
JuFo21	0.0566	0.8475	0.0667847
JuFo21	0.0833	1.3819	0.0602793
JuFo21	0.0599	1.1145	0.0537461
JuFo21	0.097	1.4222	0.0682042
JuFo21	0.0911	1.6049	0.0567637
JuFo21	0.0966	1.5918	0.060686
JuFo21	0.0798	0.8388	0.0951359
JuFo21	0.057	0.7908	0.0720789
JuFo21	0.0904	1.6001	0.0564965
JuFo22	0.0449	0.8381	0.0535736
JuFo22	0.0414	0.9947	0.0416206
JuFo22	0.0314	0.6153	0.051032
JuFo22	0.0277	0.6509	0.0425565
JuFo22	0.0296	0.5026	0.0588938
JuFo22	0.0462	0.8982	0.0514362
JuFo22	0.0258	0.6259	0.0412206
JuFo22	0.0299	0.644	0.0464286
JuFo22	0.0442	0.5035	0.0877855
JuFo22	0.0318	0.4843	0.0656618
JuFo23	0.0329	0.5641	0.058323
JuFo23	0.0359	0.5898	0.0608681
JuFo23	0.0456	0.757	0.0602378
JuFo23	0.0259	0.6661	0.0388831
JuFo23	0.0399	0.6127	0.0651216
JuFo23	0.0524	0.921	0.0568947
JuFo23	0.0474	1.0039	0.0472159
JuFo23	0.041	0.8024	0.0510967
JuFo23	0.0409	1.0274	0.0398092
JuFo23	0.026	0.5825	0.0446352
JuFo24	0.0367	1.0396	0.035302
JuFo24	0.0459	1.2596	0.0364401
JuFo24	0.0439	0.7116	0.061692
JuFo24	0.0354	0.5636	0.0628105
JuFo24	0.0892	0.8524	0.104646
JuFo24	0.0338	0.6054	0.0558309
JuFo24	0.0383	0.6783	0.0564647
JuFo24	0.0292	0.5779	0.0505278
JuFo24	0.0503	0.9562	0.0526041
JuFo24	0.0459	0.8835	0.0519525
JuCa11	0.0632	1.7333	0.0364622
JuCa11	0.073	1.5992	0.0456478
JuCa11	0.1788	1.551	0.11528
JuCa11	0.0844	1.1525	0.0732321
JuCa11	0.1054	2.0462	0.0515101
JuCa11	0.1192	1.861	0.0640516
JuCa11	0.1308	1.8974	0.0689364
JuCa11	0.0788	1.8566	0.0424432
JuCa11	0.0904	1.6588	0.0544972
JuCa11	0.078	1.686	0.0462633
JuCa12	0.1472	1.8374	0.0801132
JuCa12	0.0857	1.216	0.070477
JuCa12	0.0829	1.1463	0.0723196
JuCa12	0.1592	2.4832	0.0641108
JuCa12	0.2141	2.3429	0.0913825
JuCa12	0.4495	2.0089	0.223754
JuCa12	0.1754	1.1238	0.156078
JuCa12	0.5892	2.2455	0.262391
JuCa12	0.1889	3.8904	0.0485554
JuCa12	0.1475	1.3042	0.113096
JuCa13	0.0745	1.0249	0.07269
JuCa13	0.0545	0.7824	0.0696575
JuCa13	0.0476	0.8536	0.0557638
JuCa13	0.0586	1.054	0.0555977
JuCa13	0.0545	0.6023	0.0904865
JuCa13	0.0486	0.7391	0.0657556
JuCa13	0.0779	0.9328	0.083512
JuCa13	0.0688	0.8332	0.0825732
JuCa13	0.0841	1.3246	0.0634909
JuCa13	0.0564	0.986	0.0572008
JuCa14	0.1307	2.3333	0.0560151
JuCa14	0.2389	2.2278	0.107236
JuCa14	0.221	1.7575	0.125747
JuCa14	0.2571	1.305	0.197011
JuCa14	0.1614	1.8709	0.0862686
JuCa14	0.1744	1.8276	0.0954257
JuCa14	0.0965	1.8527	0.0520861
JuCa14	0.4978	2.9453	0.169015
JuCa14	0.1365	2.0843	0.0654896
JuCa14	0.1317	1.744	0.0755161
JuCa21	0.1604	2.7298	0.0587589
JuCa21	0.1138	1.2117	0.0939176
JuCa21	0.1031	1.8666	0.0552341
JuCa21	0.0784	1.484	0.0528302
JuCa21	0.0893	1.4148	0.0631185
JuCa21	0.1094	1.6475	0.0664036
JuCa21	0.0982	1.1078	0.0886442
JuCa21	0.1168	1.3341	0.0875497
JuCa21	0.1143	2.3352	0.0489466
JuCa21	0.1677	2.1178	0.0791859
JuCa22	0.1178	1.3904	0.0847238
JuCa22	0.0949	1.3898	0.0682832
JuCa22	0.0729	1.2854	0.0567139
JuCa22	0.0816	1.2402	0.0657958
JuCa22	0.1222	1.8132	0.0673947
JuCa22	0.0674	1.5436	0.0436642
JuCa22	0.0622	0.9838	0.0632242
JuCa22	0.0732	1.1023	0.0664066
JuCa22	0.0913	1.3404	0.068114
JuCa22	0.0735	1.0117	0.07265
JuCa23	0.109	1.328	0.0820783
JuCa23	0.098	1.3632	0.0718897
JuCa23	0.2298	4.0021	0.0574199
JuCa23	0.142	1.7156	0.0827699
JuCa23	0.1	1.3041	0.0766812
JuCa23	0.0934	1.3455	0.0694166
JuCa23	0.0963	1.2196	0.0789603
JuCa23	0.0803	1.1193	0.0717413
JuCa23	0.0698	1.0184	0.0685389
JuCa23	0.0682	1.0488	0.0650267
JuCa24	0.2443	1.8619	0.13121
JuCa24	0.3298	2.2812	0.144573
JuCa24	0.1884	2.3176	0.081291
JuCa24	0.2029	1.7265	0.117521
JuCa24	0.1555	2.1423	0.0725855
JuCa24	0.2245	1.9174	0.117086
JuCa24	0.1268	1.5508	0.0817643
JuCa24	0.095	1.2267	0.0774435
JuCa24	0.1055	1.5454	0.0682671
JuCa24	0.3295	1.9295	0.17077
			#DIV/0!
SeAg11	0.1307	1.4825	0.0881619
SeAg11	0.1586	1.9641	0.0807495
SeAg11	0.1643	2.5472	0.0645022
SeAg11	0.1287	1.7478	0.0736354
SeAg11	0.1671	2.1902	0.0762944
SeAg11	0.1229	1.6744	0.0733994
SeAg11	0.1444	1.8264	0.0790626
SeAg11	0.1938	2.6291	0.0737134
SeAg11	0.2371	4.6633	0.0508438
SeAg11	0.2154	3.7724	0.0570989
SeAg12	0.3159	2.5398	0.12438
SeAg12	0.2403	2.9054	0.0827081
SeAg12	0.3373	5.778	0.0583766
SeAg12	0.1934	4.3752	0.0442037
SeAg12	0.1566	1.9182	0.081639
SeAg12	0.1773	2.0588	0.0861181
SeAg12	0.1772	2.3002	0.0770368
SeAg12	0.1131	1.2533	0.0902418
SeAg12	0.1264	1.6935	0.0746383
SeAg12	0.1795	2.4176	0.0742472
SeAg13	0.1658	2.6419	0.0627579
SeAg13	0.1256	1.4043	0.0894396
SeAg13	0.094	1.3507	0.0695935
SeAg13	0.1094	1.3248	0.0825785
SeAg13	0.0715	1.1381	0.062824
SeAg13	0.1566	1.6669	0.0939468
SeAg13	0.1878	2.8723	0.0653831
SeAg13	0.1505	2.43	0.0619342
SeAg13	0.2098	2.7725	0.0756718
SeAg13	0.1543	1.8452	0.0836224
SeAg14	0.095	1.2187	0.0779519
SeAg14	0.127	1.1391	0.111492
SeAg14	0.0932	1.1601	0.0803379
SeAg14	0.0985	0.8015	0.122895
SeAg14	0.0713	0.8726	0.0817098
SeAg14	0.1078	1.4698	0.0733433
SeAg14	0.1125	1.315	0.0855513
SeAg14	0.1134	1.0974	0.103335
SeAg14	0.1248	1.7165	0.0727061
SeAg14	0.0845	0.976	0.0865779
SeAg21	0.1687	3.4109	0.0494591
SeAg21	0.1942	4.8713	0.0398662
SeAg21	0.212	3.6554	0.0579964
SeAg21	0.1315	2.0225	0.0650185
SeAg21	0.0926	1.3896	0.0666379
SeAg21	0.1117	1.7906	0.0623813
SeAg21	0.138	2.1472	0.0642697
SeAg21	0.1028	1.9997	0.0514077
SeAg21	0.1103	1.7495	0.0630466
SeAg21	0.1216	1.6352	0.074364
SeAg22	0.1122	3.3199	0.0337962
SeAg22	0.1398	1.983	0.0704992
SeAg22	0.1488	2.2269	0.0668193
SeAg22	0.1024	1.464	0.0699454
SeAg22	0.2041	2.8091	0.0726567
SeAg22	0.1212	2.4645	0.0491783
SeAg22	0.1307	2.7371	0.0477513
SeAg22	0.2412	4.424	0.0545208
SeAg22	0.1601	3.4014	0.0470689
SeAg22	0.1529	2.3589	0.0648183
SeAg23	0.0608	0.8976	0.0677362
SeAg23	0.0673	0.9412	0.0715045
SeAg23	0.1016	1.1804	0.0860725
SeAg23	0.0658	1.2254	0.0536968
SeAg23	0.0634	0.9377	0.0676122
SeAg23	0.0725	1.2093	0.059952
SeAg23	0.0867	0.9861	0.0879221
SeAg23	0.0422	0.6114	0.0690219
SeAg23	0.0538	0.6308	0.0852885
SeAg23	0.0637	1.1357	0.0560888
SeAg24	0.0823	1.119	0.0735478
SeAg24	0.088	1.4776	0.059556
SeAg24	0.1024	1.4665	0.0698261
SeAg24	0.0737	1.4909	0.0494332
SeAg24	0.0827	1.254	0.065949
SeAg24	0.1147	3.3111	0.0346411
SeAg24	0.0698	1.0897	0.0640543
SeAg24	0.1152	1.641	0.0702011
SeAg24	0.0677	1.9869	0.0340732
SeAg24	0.1664	2.5543	0.065145
SeVa11	0.1136	1.0306	0.110227
SeVa11	0.0873	1.1255	0.0775655
SeVa11	0.1355	1.434	0.0944909
SeVa11	0.1132	1.2375	0.0914747
SeVa11	0.169	1.2406	0.136224
SeVa11	0.19995	2.2456	0.0890408
SeVa11	0.4338	1.5993	0.271244
SeVa11	0.1282	1.7519	0.0731777
SeVa11	0.1198	3.1445	0.0380983
SeVa11	0.1845	1.3996	0.131823
SeVa12	0.1722	1.3628	0.126357
SeVa12	0.0977	1.242	0.0786634
SeVa12	0.2038	1.5215	0.133947
SeVa12	0.1804	1.9348	0.0932396
SeVa12	0.1065	1.105	0.0963801
SeVa12	0.2411	2.5286	0.0953492
SeVa12	0.1693	2.8449	0.05951
SeVa12	0.2588	2.1303	0.121485
SeVa12	0.1726	2.2657	0.0761795
SeVa12	0.1321	1.5452	0.0854906
SeVa13	0.0951	1.1326	0.0839661
SeVa13	0.0581	1.404	0.0413818
SeVa13	0.1292	1.4207	0.0909411
SeVa13	0.1522	1.4838	0.102574
SeVa13	0.0919	1.0435	0.088069
SeVa13	0.0541	0.7321	0.073897
SeVa13	0.0718	0.9752	0.0736259
SeVa13	0.0537	0.7852	0.0683902
SeVa13	0.0927	1.1964	0.0774824
SeVa13	0.154	1.29	0.11938
SeVa14	0.0854	0.966	0.0884058
SeVa14	0.0898	1.3436	0.0668354
SeVa14	0.0907	1.2756	0.0711038
SeVa14	0.0842	1.2016	0.0700732
SeVa14	0.0779	1.6081	0.0484423
SeVa14	0.0653	1.1205	0.0582776
SeVa14	0.1215	1.5828	0.0767627
SeVa14	0.0843	1.3185	0.0639363
SeVa14	0.0845	1.1886	0.071092
SeVa14	0.1525	1.6957	0.0899334
SeVa21	0.0959	1.4568	0.0658292
SeVa21	0.0955	1.2556	0.0760593
SeVa21	0.0935	0.8241	0.113457
SeVa21	0.1078	1.1415	0.0944371
SeVa21	0.06	1.2947	0.0463428
SeVa21	0.1805	1.4702	0.122772
SeVa21	0.1099	1.3362	0.0822482
SeVa21	0.1203	1.2471	0.0964638
SeVa21	0.1136	1.5976	0.0711067
SeVa21	0.0902	2.0926	0.0431043
SeVa22	0.0789	1.1837	0.0666554
SeVa22	0.0891	1.2874	0.0692093
SeVa22	0.0754	1.0654	0.0707715
SeVa22	0.0804	1.4327	0.0561178
SeVa22	0.0618	1.2493	0.0494677
SeVa22	0.108	1.2588	0.085796
SeVa22	0.058	0.8893	0.0652198
SeVa22	0.096	1.2264	0.0782779
SeVa22	0.047	0.7723	0.0608572
SeVa22	0.0745	0.9831	0.0757807
SeVa23	0.1873	1.0337	0.181194
SeVa23	0.0782	0.9098	0.085953
SeVa23	0.08	1.2609	0.0634467
SeVa23	0.0698	0.8003	0.0872173
SeVa23	0.2432	1.5532	0.15658
SeVa23	0.2374	1.2558	0.189043
SeVa23	0.0761	1.2003	0.0634008
SeVa23	0.069	0.8906	0.0774759
SeVa23	0.0598	1.0725	0.0557576
SeVa23	0.0935	1.0131	0.092291
SeVa24	0.133	1.4346	0.0927088
SeVa24	0.0693	0.9595	0.0722251
SeVa24	0.1025	1.2464	0.0822368
SeVa24	0.1334	2.4741	0.0539186
SeVa24	0.0985	1.1635	0.0846584
SeVa24	0.0996	1.031	0.0966052
SeVa24	0.1061	1.1595	0.091505
SeVa24	0.1755	1.0878	0.161335
SeVa24	0.1455	1.332	0.109234
SeVa24	0.1676	1.0236	0.163736
SeCm11	0.2083	1.188	0.175337
SeCm11	0.1076	1.2843	0.083781
SeCm11	0.2324	1.7294	0.134382
SeCm11	0.1786	1.7171	0.104013
SeCm11	0.0867	1.3	0.0666923
SeCm11	0.1724	1.725	0.099942
SeCm11	0.1988	1.3965	0.142356
SeCm11	0.2123	1.5876	0.133724
SeCm11	0.0972	1.5802	0.0615112
SeCm11	0.1239	1.7508	0.0707676
SeCm12	0.1969	4.3859	0.0448939
SeCm12	0.0872	1.8743	0.046524
SeCm12	0.107	1.2343	0.0866888
SeCm12	0.1263	2.1756	0.058053
SeCm12	0.1304	2.3272	0.056033
SeCm12	0.0652	1.3821	0.0471746
SeCm12	0.0916	1.297	0.0706245
SeCm12	0.1788	1.54	0.116104
SeCm12	0.1226	2.0044	0.0611654
SeCm12	0.1942	2.1957	0.0884456
SeCm13	0.1349	1.5787	0.0854501
SeCm13	0.1076	1.4679	0.073302
SeCm13	0.1274	1.882	0.0676939
SeCm13	0.127	1.7135	0.0741173
SeCm13	0.0806	1.0694	0.0753694
SeCm13	0.0848	1.1553	0.0734008
SeCm13	0.1154	1.5915	0.0725102
SeCm13	0.117	1.5988	0.0731799
SeCm13	0.088	1.3971	0.0629876
SeCm13	0.1203	1.7329	0.0694212
SeCm14	0.1616	2.2413	0.072101
SeCm14	0.1388	1.9823	0.0700197
SeCm14	0.1717	2.2123	0.0776115
SeCm14	0.0997	1.4898	0.0669217
SeCm14	0.101	1.4975	0.0674457
SeCm14	0.1443	2.3891	0.0603993
SeCm14	0.1414	1.755	0.0805698
SeCm14	0.1223	1.4448	0.0846484
SeCm14	0.1052	1.3603	0.0773359
SeCm14	0.1048	1.3963	0.0750555
SeCm21	0.3315	3.3074	0.10023
SeCm21	0.2936	4.0086	0.0732425
SeCm21	0.1486	2.2094	0.0672581
SeCm21	0.2364	4.3247	0.0546628
SeCm21	0.1259	1.7941	0.0701745
SeCm21	0.1245	1.4587	0.08535
SeCm21	0.2392	3.5194	0.0679661
SeCm21	0.2061	3.1094	0.0662829
SeCm21	0.1436	2.1318	0.0673609
SeCm21	0.1319	1.9201	0.0686943
SeCm22	0.1325	1.484	0.0892857
SeCm22	0.2522	2.6434	0.0954074
SeCm22	0.2528	1.8245	0.138559
SeCm22	0.1597	1.8812	0.0848926
SeCm22	0.2247	2.8822	0.0779613
SeCm22	0.174	2.0464	0.0850274
SeCm22	0.1275	2.3271	0.0547892
SeCm22	0.1055	1.3144	0.0802648
SeCm22	0.2759	1.7862	0.154462
SeCm22	0.1088	1.2206	0.0891365
SeCm23	0.1511	1.6388	0.0676911
SeCm23	0.1603	2.2322	0.0713173
SeCm23	0.1133	2.2477	0.0693009
SeCm23	0.0871	1.6349	0.0825749
SeCm23	0.1271	1.0548	0.0786948
SeCm23	0.115	1.6151	0.0474736
SeCm23	0.1552	2.4224	0.0534933
SeCm23	0.2324	2.9013	0.0854946
SeCm23	0.2041	2.7183	0.109643
SeCm23	0.3059	1.8615	0.11835
SeCm24	0.1773	2.5847	0.0943085
SeCm24	0.1901	1.88	0.0873902
SeCm24	0.1425	2.1753	0.0456643
SeCm24	0.2409	3.1206	0.103885
SeCm24	0.1961	2.3189	0.124706
SeCm24	0.2207	1.5725	0.129504
SeCm24	0.1218	1.7042	0.0633056
SeCm24	0.137	1.924	0.0634759
SeCm24	0.1722	2.1583	0.125164
SeCm24	0.1008	1.3758	0.0869715
SeMo11	0.0978	1.159	0.0843831
SeMo11	0.105	1.8764	0.0559582
SeMo11	0.1574	1.6487	0.0954692
SeMo11	0.189	2.2737	0.0831244
SeMo11	0.0784	1.2978	0.0604099
SeMo11	0.1752	2.1668	0.0808566
SeMo11	0.1497	1.9294	0.0775889
SeMo11	0.0925	1.7979	0.0514489
SeMo11	0.167	1.8817	0.0887495
SeMo11	0.1254	1.4946	0.083902
SeMo12	0.0617	1.1754	0.0524928
SeMo12	0.0908	1.4779	0.0614385
SeMo12	0.0521	0.9887	0.0526955
SeMo12	0.0577	0.95	0.0607368
SeMo12	0.0821	1.3682	0.0600058
SeMo12	0.0851	1.4035	0.0606341
SeMo12	0.0916	1.5237	0.0601168
SeMo12	0.0833	1.3354	0.0623783
SeMo12	0.0555	0.9966	0.0556893
SeMo12	0.0702	1.0602	0.0662139
SeMo13	0.1191	1.6436	0.0724629
SeMo13	0.0708	1.8109	0.0390966
SeMo13	0.1143	1.943	0.0588266
SeMo13	0.0602	1.5791	0.038123
SeMo13	0.0807	1.5461	0.0521958
SeMo13	0.0894	1.2034	0.0742895
SeMo13	0.0815	1.1978	0.0680414
SeMo13	0.0802	1.3109	0.0611793
SeMo13	0.1151	1.8616	0.0618285
SeMo13	0.0918	1.4902	0.0616025
SeMo14	0.188	2.6023	0.0722438
SeMo14	0.1969	2.4144	0.0815524
SeMo14	0.259	2.9817	0.0868632
SeMo14	0.1631	2.6553	0.0614243
SeMo14	0.1103	1.6724	0.0659531
SeMo14	0.133	2.1115	0.0629884
SeMo14	0.0661	1.0581	0.0624705
SeMo14	0.1783	2.7552	0.064714
SeMo14	0.1125	1.646	0.0683475
SeMo14	0.2508	2.6858	0.09338
SeMo21	0.163	2.1707	0.075091
SeMo21	0.128	1.8538	0.0690474
SeMo21	0.1604	2.3912	0.0670793
SeMo21	0.1844	1.9721	0.0935044
SeMo21	0.1989	2.3662	0.0840588
SeMo21	0.231	2.8202	0.0819091
SeMo21	0.2114	2.1179	0.0998159
SeMo21	0.1397	1.8456	0.0756935
SeMo21	0.1844	2.407	0.0766099
SeMo21	0.1601	2.7396	0.0584392
SeMo22	0.0761	1.5443	0.049278
SeMo22	0.1071	1.8191	0.0588753
SeMo22	0.093	1.9026	0.0488805
SeMo22	0.1161	2.3965	0.0484456
SeMo22	0.1058	1.9687	0.053741
SeMo22	0.1361	2.4849	0.0547708
SeMo22	0.1783	2.4628	0.0723973
SeMo22	0.1419	2.5401	0.0558639
SeMo22	0.1371	2.1594	0.0634899
SeMo22	0.13	2.05	0.0634146
SeMo23	0.0752	0.9166	0.0820423
SeMo23	0.0955	1.9481	0.0490221
SeMo23	0.1261	2.012	0.062674
SeMo23	0.0915	1.1969	0.0764475
SeMo23	0.1465	2.2219	0.0659346
SeMo23	0.0743	1.1256	0.0660092
SeMo23	0.1538	2.7397	0.0561375
SeMo23	0.216	2.4528	0.0880626
SeMo23	0.111	1.6575	0.0669683
SeMo23	0.1008	1.7687	0.056991
SeMo24	0.075	1.0902	0.0687947
SeMo24	0.118	1.4808	0.0796867
SeMo24	0.1052	1.3982	0.0752396
SeMo24	0.0752	1.2814	0.0586858
SeMo24	0.0768	1.1573	0.0663614
SeMo24	0.176	1.7978	0.0978974
SeMo24	0.1602	2.8441	0.0563271
SeMo24	0.1063	1.762	0.0603292
SeMo24	0.2838	1.5468	0.183476
SeMo24	0.0945	1.575	0.06
SeFo11	0.0477	0.6609	0.0721743
SeFo11	0.0349	0.613	0.0569331
SeFo11	0.0323	0.6151	0.0525118
SeFo11	0.0546	0.8359	0.0653188
SeFo11	0.0243	0.5562	0.0436893
SeFo11	0.0353	0.7884	0.0447742
SeFo11	0.0304	0.7784	0.0390545
SeFo11	0.0398	0.5646	0.0704924
SeFo11	0.1022	0.7776	0.13143
SeFo11	0.0328	0.8979	0.0365297
SeFo12	0.0735	1.0914	0.0673447
SeFo12	0.065	0.9564	0.0679632
SeFo12	0.0676	1.1091	0.0609503
SeFo12	0.0769	1.1707	0.0656872
SeFo12	0.0575	0.9575	0.0600522
SeFo12	0.0606	0.9566	0.0633494
SeFo12	0.0843	1.2728	0.0662319
SeFo12	0.0827	1.3466	0.0614139
SeFo12	0.1235	1.6845	0.0733155
SeFo12	0.0623	1.0826	0.0575466
SeFo13	0.0661	0.99	0.0667677
SeFo13	0.0706	0.9746	0.07244
SeFo13	0.0683	0.993	0.0687815
SeFo13	0.1452	2.0566	0.070602
SeFo13	0.0975	1.3528	0.0720727
SeFo13	0.0709	1.2676	0.0559325
SeFo13	0.0903	1.1357	0.0795104
SeFo13	0.078	1.187	0.0657119
SeFo13	0.0703	1.2471	0.0563708
SeFo13	0.1039	1.5855	0.0655314
SeFo14	0.0832	1.3221	0.0629302
SeFo14	0.0872	1.3788	0.0632434
SeFo14	0.0895	1.4333	0.0624433
SeFo14	0.1726	2.4592	0.0701854
SeFo14	0.0956	1.5475	0.0617771
SeFo14	0.1222	1.4682	0.0832312
SeFo14	0.0913	1.3024	0.0701014
SeFo14	0.108	1.6342	0.0660874
SeFo14	0.0971	1.387	0.0700072
SeFo14	0.1231	2.0486	0.0600898
SeFo21	0.0733	0.9552	0.0767379
SeFo21	0.0858	1.4281	0.0600798
SeFo21	0.059	1.0783	0.0547158
SeFo21	0.0665	0.9781	0.067989
SeFo21	0.0588	0.8292	0.0709117
SeFo21	0.0974	1.2727	0.0765302
SeFo21	0.0722	1.1202	0.0644528
SeFo21	0.0821	1.0598	0.0774674
SeFo21	0.1089	1.6969	0.0641759
SeFo21	0.0752	1.1775	0.0638641
SeFo22	0.0734	1.386	0.0529582
SeFo22	0.0701	0.9278	0.0755551
SeFo22	0.069	1.2499	0.0552044
SeFo22	0.1038	1.269	0.0817967
SeFo22	0.0422	0.8741	0.0482782
SeFo22	0.0847	1.8195	0.0465513
SeFo22	0.1195	1.6078	0.0743252
SeFo22	0.0649	1.0982	0.0590967
SeFo22	0.0737	1.1949	0.0616788
SeFo22	0.0766	0.8809	0.0869565
SeFo23	0.0369	0.7234	0.0510091
SeFo23	0.0395	0.6088	0.0648817
SeFo23	0.0429	0.6376	0.0672836
SeFo23	0.0478	0.9213	0.0518832
SeFo23	0.0418	0.8993	0.0464806
SeFo23	0.0687	1.2863	0.053409
SeFo23	0.0487	0.6209	0.0784345
SeFo23	0.0577	0.8593	0.0671477
SeFo23	0.1236	1.4756	0.0837625
SeFo23	0.0993	1.5128	0.0656399
SeFo24	0.0512	0.946	0.0541226
SeFo24	0.0554	1.1928	0.0464453
SeFo24	0.0953	1.6771	0.0568243
SeFo24	0.0776	1.3442	0.0577295
SeFo24	0.0686	1.0823	0.0633835
SeFo24	0.0697	1.0716	0.0650429
SeFo24	0.077	1.0243	0.0751733
SeFo24	0.048	0.7647	0.0627697
SeFo24	0.0533	0.9109	0.0585136
SeFo24	0.0584	0.8203	0.0711935
SeCa11	0.1271	2.2068	0.0575947
SeCa11	0.118	2.7918	0.0422666
SeCa11	0.1143	1.9006	0.0601389
SeCa11	0.0894	2.0244	0.0441612
SeCa11	0.0902	2.6053	0.0346217
SeCa11	0.1052	0.9037	0.11641
SeCa11	0.093	0.864	0.107639
SeCa11	0.1053	1.9336	0.054458
SeCa11	0.2076	2.2054	0.0941326
SeCa11	0.1182	2.0518	0.057608
SeCa12	0.11	1.2536	0.0877473
SeCa12	0.0452	0.6552	0.0689866
SeCa12	0.1084	1.5724	0.0689392
SeCa12	0.0618	0.7606	0.0812516
SeCa12	0.0706	0.9663	0.0730622
SeCa12	0.0627	0.8876	0.0706399
SeCa12	0.1938	1.9124	0.101339
SeCa12	0.2022	1.0229	0.197673
SeCa12	0.169	0.9029	0.187175
SeCa12	0.1236	0.8869	0.139362
SeCa13	0.0873	1.0365	0.0842258
SeCa13	0.2247	1.2425	0.180845
SeCa13	0.0619	1.0011	0.061832
SeCa13	0.2674	2.265	0.118057
SeCa13	0.1505	1.2411	0.121263
SeCa13	0.0526	0.8735	0.0602175
SeCa13	0.1467	1.2162	0.120622
SeCa13	0.09	0.9845	0.091417
SeCa13	0.1013	1.1615	0.0872148
SeCa13	0.2952	1.7095	0.172682
SeCa14	0.278	2.3632	0.117637
SeCa14	0.1165	2.2074	0.052777
SeCa14	0.2377	4.1826	0.0568307
SeCa14	0.1132	1.6705	0.0677641
SeCa14	0.2065	3.5893	0.0575321
SeCa14	0.1622	2.7656	0.0586491
SeCa14	0.1384	3.8106	0.0363197
SeCa14	0.1557	2.4706	0.0630211
SeCa14	0.1514	2.0729	0.0730378
SeCa14	0.2804	1.4304	0.196029
SeCa21	0.0411	0.6549	0.0627577
SeCa21	0.085	0.7123	0.119332
SeCa21	0.0915	1.6933	0.0540365
SeCa21	0.0517	0.944	0.0547669
SeCa21	0.1633	2.8465	0.0573687
SeCa21	0.0615	0.9666	0.0636251
SeCa21	0.0514	1.0383	0.049504
SeCa21	0.1264	1.0484	0.120565
SeCa21	0.1551	0.8505	0.182363
SeCa21	0.0491	1.0211	0.0480854
SeCa22	0.0556	0.5569	0.0998384
SeCa22	0.0647	0.6437	0.100513
SeCa22	0.0963	0.633	0.152133
SeCa22	0.11	1.0287	0.106931
SeCa22	0.069	1.1509	0.0599531
SeCa22	0.0625	0.9807	0.06373
SeCa22	0.0712	0.882	0.0807256
SeCa22	0.0732	1.0902	0.0671436
SeCa22	0.0617	0.9863	0.062557
SeCa22	0.1835	0.8544	0.214771
SeCa23	0.1408	3.2764	0.042974
SeCa23	0.084	1.0364	0.0810498
SeCa23	0.0927	2.085	0.0444604
SeCa23	0.165	2.3042	0.0716084
SeCa23	0.1626	2.8874	0.0563136
SeCa23	0.1384	2.1991	0.0629348
SeCa23	0.1503	2.1778	0.0690146
SeCa23	0.0833	1.2849	0.0648299
SeCa23	0.1278	2.3399	0.0546177
SeCa23	0.1676	2.6379	0.0635354
SeCa24	0.0375	0.6687	0.056079
SeCa24	0.0407	0.5931	0.0686225
SeCa24	0.0358	0.7171	0.0499233
SeCa24	0.0681	1.1044	0.0616624
SeCa24	0.0453	0.7604	0.0595739
SeCa24	0.0625	0.7043	0.0887406
SeCa24	0.0348	0.7026	0.0495303
SeCa24	0.0439	0.6819	0.0643789
SeCa24	0.071	1.447	0.049067
SeCa24	0.0672	1.1169	0.0601665
OuAg11	0.104	1.5461	0.067266
OuAg11	0.2331	3.3928	0.0687043
OuAg11	0.093	1.3449	0.0691501
OuAg11	0.1019	1.2802	0.0795969
OuAg11	0.1004	1.6927	0.0593135
OuAg11	0.0982	1.1985	0.0819358
OuAg11	0.0685	0.8492	0.0806642
OuAg11	0.0712	0.9882	0.0720502
OuAg11	0.087	1.1317	0.0768755
OuAg11	0.0506	0.7161	0.0706605
OuAg12	0.1339	2.8948	0.0462554
OuAg12	0.1209	2.3193	0.0521278
OuAg12	0.1633	2.3388	0.0698221
OuAg12	0.1499	2.3904	0.0627092
OuAg12	0.1014	1.2029	0.0842963
OuAg12	0.1091	1.6236	0.0671964
OuAg12	0.1363	1.7486	0.0779481
OuAg12	0.1523	2.3596	0.0645448
OuAg12	0.1052	1.1218	0.0937779
OuAg12	0.0823	1.4718	0.0559179
OuAg13	0.0868	1.314	0.0660578
OuAg13	0.0703	0.9564	0.0735048
OuAg13	0.0766	1.0902	0.0702623
OuAg13	0.105	1.7501	0.0599966
OuAg13	0.0867	1.1281	0.0768549
OuAg13	0.1205	1.6532	0.0728889
OuAg13	0.0648	0.9501	0.0682033
OuAg13	0.129	1.8819	0.0685477
OuAg13	0.1811	2.2685	0.0798325
OuAg13	0.1072	1.6893	0.0634582
OuAg14	0.0846	1.0797	0.0783551
OuAg14	0.0972	1.3149	0.073922
OuAg14	0.0969	1.7115	0.056617
OuAg14	0.0901	1.332	0.0676426
OuAg14	0.073	1.1732	0.062223
OuAg14	0.1041	1.1866	0.0877296
OuAg14	0.0551	1.0511	0.0524213
OuAg14	0.1149	1.6657	0.06898
OuAg14	0.0975	1.3705	0.0711419
OuAg14	0.0683	0.9236	0.0739498
OuAg21	0.1007	1.3606	0.0740115
OuAg21	0.1836	3.2177	0.0570594
OuAg21	0.1191	2.1711	0.054857
OuAg21	0.1453	1.7128	0.0848319
OuAg21	0.1787	1.8563	0.0962668
OuAg21	0.0942	1.4326	0.0657546
OuAg21	0.1071	1.5613	0.0685967
OuAg21	0.1574	1.8927	0.0831616
OuAg21	0.1023	1.2897	0.0793208
OuAg21	0.1016	1.443	0.0704089
OuAg22	0.1147	1.7829	0.0643334
OuAg22	0.0865	1.3775	0.0627949
OuAg22	0.0816	1.3001	0.0627644
OuAg22	0.1248	2.3649	0.0527718
OuAg22	0.0955	1.1838	0.0806724
OuAg22	0.1652	1.9151	0.0862618
OuAg22	0.1309	2.2107	0.059212
OuAg22	0.103	1.2381	0.083192
OuAg22	0.101	1.6805	0.0601012
OuAg22	0.0977	1.4133	0.069129
OuAg23	0.1204	1.688	0.071327
OuAg23	0.2516	1.4758	0.170484
OuAg23	0.0557	1.3942	0.0399512
OuAg23	0.1118	1.6547	0.0675651
OuAg23	0.1298	1.8093	0.0717405
OuAg23	0.1516	2.7325	0.0554803
OuAg23	0.1182	1.7116	0.0690582
OuAg23	0.1877	2.6851	0.0699043
OuAg23	0.1431	1.5415	0.0928317
OuAg23	0.1246	1.5387	0.0809774
OuAg24	0.2974	3.4751	0.0855803
OuAg24	0.1509	2.6289	0.0574004
OuAg24	0.1567	2.6678	0.0587375
OuAg24	0.1399	2.6609	0.0525762
OuAg24	0.1977	3.4714	0.0569511
OuAg24	0.1509	2.2928	0.0658147
OuAg24	0.3081	4.4268	0.0695988
[truncated: 883 more rows]

## Sheet:  clump thickness (cm)
Code	clump thickness
JaAg11	3.9
JaAg11	2.5
JaAg11	4.5
JaAg11	5.2
JaAg12	4.3
JaAg12	3.9
JaAg12	6.2
JaAg12	4.1
JaAg13	4.3
JaAg13	4.8
JaAg13	3
JaAg13	2.3
JaAg14	2.4
JaAg14	2.1
JaAg14	2.9
JaAg14	4.4
JaAg21	5.9
JaAg21	5.4
JaAg21	2.7
JaAg21	3.5
JaAg22	3
JaAg22	6.1
JaAg22	4.4
JaAg22	2.5
JaAg23	4.2
JaAg23	4
JaAg23	3.5
JaAg23	3.5
JaAg24	7.2
JaAg24	6.2
JaAg24	4.2
JaAg24	4.4
JaVa11	7.7
JaVa11	4.7
JaVa11	4.8
JaVa11	9.2
JaVa12	4.3
JaVa12	2.6
JaVa12	2.5
JaVa12	2.8
JaVa13	2.6
JaVa13	3.5
JaVa13	4
JaVa13	4.1
JaVa14	4.5
JaVa14	4.2
JaVa14	4.5
JaVa14	4.5
JaVa21	5.2
JaVa21	3.7
JaVa21	4.1
JaVa21	3.3
JaVa22	3.2
JaVa22	3.5
JaVa22	3.6
JaVa22	2.4
JaVa23	3.3
JaVa23	4.2
JaVa23	3.4
JaVa23	3.7
JaVa24	3.5
JaVa24	2.2
JaVa24	4.2
JaVa24	3.6
JaCm11	3.1
JaCm11	3.2
JaCm11	3.3
JaCm11	3.5
JaCm12	2.9
JaCm12	2.2
JaCm12	3.5
JaCm12	2.5
JaCm13	3.2
JaCm13	2.9
JaCm13	2.7
JaCm13	2.8
JaCm14	3.2
JaCm14	2.8
JaCm14	2.8
JaCm14	3.8
JaCm21	2.4
JaCm21	3.5
JaCm21	2.7
JaCm21	2.5
JaCm22	2.6
JaCm22	2.7
JaCm22	2.5
JaCm22	2.7
JaCm23	2.5
JaCm23	2.2
JaCm23	3.9
JaCm23	2.2
JaCm24	2.5
JaCm24	2.6
JaCm24	3.1
JaCm24	3.7
JaMo11	3.4
JaMo11	3.1
JaMo11	3.4
JaMo11	3.2
JaMo12	3.2
JaMo12	3.6
JaMo12	3.5
JaMo12	3.2
JaMo13	2.6
JaMo13	3.6
JaMo13	2.1
JaMo13	4.1
JaMo14	1.9
JaMo14	1.8
JaMo14	1.8
JaMo14	1.8
JaMo21	2.3
JaMo21	2.4
JaMo21	2.3
JaMo21	2.3
JaMo22	1.4
JaMo22	2.4
JaMo22	2.5
JaMo22	2.5
JaMo23	2.4
JaMo23	2
JaMo23	2.2
JaMo23	1.6
JaMo24	2
JaMo24	2.1
JaMo24	1.8
JaMo24	1.8
JaFo11	2.4
JaFo11	2.4
JaFo11	2.3
JaFo11	2.8
JaFo12	3.2
JaFo12	3
JaFo12	2.5
JaFo12	3.9
JaFo13	3.9
JaFo13	2.5
JaFo13	2.4
JaFo13	2.5
JaFo14	3.9
JaFo14	3.4
JaFo14	2.7
JaFo14	3.9
JaFo21	2.4
JaFo21	2.6
JaFo21	1.5
JaFo21	2.1
JaFo22	2.9
JaFo22	3.2
JaFo22	3.2
JaFo22	2.9
JaFo23	3.2
JaFo23	3.3
JaFo23	2.9
JaFo23	2.4
JaFo24	3.2
JaFo24	3.7
JaFo24	3.4
JaFo24	2.4
JaCa11	2.2
JaCa11	3.4
JaCa11	3.4
JaCa11	2.6
JaCa12	5.1
JaCa12	4.1
JaCa12	4.1
JaCa12	3.8
JaCa13	4.9
JaCa13	3.9
JaCa13	4.2
JaCa13	4.4
JaCa14	2.8
JaCa14	3.2
JaCa14	3.7
JaCa14	3.8
JaCa21	3.5
JaCa21	3.5
JaCa21	5.9
JaCa21	6.5
JaCa22	2.7
JaCa22	4.2
JaCa22	3.2
JaCa22	4.7
JaCa23	2.8
JaCa23	4.8
JaCa23	3.2
JaCa23	6
JaCa24	5.2
JaCa24	6.5
JaCa24	7.7
JaCa24	5.3
AbAg11	2.1
AbAg11	2.1
AbAg11	2.9
AbAg11	3.9
AbAg12	2.1
AbAg12	3.8
AbAg12	2.2
AbAg12	3.1
AbAg13	3.3
AbAg13	2.2
AbAg13	2.5
AbAg13	2.9
AbAg14	3.2
AbAg14	2.6
AbAg14	3.5
AbAg14	2.1
AbAg21	2.5
AbAg21	3.3
AbAg21	2.8
AbAg21	2.9
AbAg22	4.1
AbAg22	3.6
AbAg22	3.8
AbAg22	3.4
AbAg23	2.7
AbAg23	2.5
AbAg23	3.2
AbAg23	4.2
AbAg24	4.5
AbAg24	1.8
AbAg24	3.2
AbAg24	3.1
AbVa11	3.7
AbVa11	2.1
AbVa11	3.2
AbVa11	1.1
AbVa12	2
AbVa12	2.9
AbVa12	2.5
AbVa12	3
AbVa13	4.2
AbVa13	3.7
AbVa13	4
AbVa13	2.1
AbVa14	2.8
AbVa14	3.4
AbVa14	2.2
AbVa14	3.4
AbVa21	2.1
AbVa21	2.7
AbVa21	2.2
AbVa21	2.5
AbVa22	2.4
AbVa22	1.1
AbVa22	1.2
AbVa22	3.8
AbVa23	2.5
AbVa23	2.5
AbVa23	4.1
AbVa23	2.1
AbVa24	4.2
AbVa24	2.9
AbVa24	2.3
AbVa24	1.8
AbCm11	2
AbCm11	2.2
AbCm11	1.5
AbCm11	1.5
AbCm12	1.9
AbCm12	2.1
AbCm12	1.7
AbCm12	2
AbCm13	1.8
AbCm13	1.9
AbCm13	2.1
AbCm13	2.1
AbCm14	2.9
AbCm14	3.2
AbCm14	2.2
AbCm14	3.2
AbCm21	1.7
AbCm21	1.1
AbCm21	0.8
AbCm21	1.5
AbCm22	1.8
AbCm22	2.4
AbCm22	2
AbCm22	1.7
AbCm23	2.1
AbCm23	1.4
AbCm23	2.3
AbCm23	2
AbCm24	2.2
AbCm24	2.1
AbCm24	2.8
AbCm24	1.7
AbMo11	2
AbMo11	2
AbMo11	2.3
AbMo11	2.1
AbMo12	2.2
AbMo12	1.2
AbMo12	1.9
AbMo12	2
AbMo13	3
AbMo13	4.1
AbMo13	3.1
AbMo13	2.2
AbMo14	2.3
AbMo14	3.6
AbMo14	2.4
AbMo14	3.3
AbMo21	4.5
AbMo21	5.1
AbMo21	4.4
AbMo21	2.3
AbMo22	2.5
AbMo22	1.5
AbMo22	2.5
AbMo22	3.5
AbMo23	3
AbMo23	3.3
AbMo23	4.4
AbMo23	3
AbMo24	3
AbMo24	4
AbMo24	3.4
AbMo24	3.8
AbFo11	3.1
AbFo11	2.1
AbFo11	2.4
AbFo11	2.6
AbFo12	1.9
AbFo12	1.5
AbFo12	1.6
AbFo12	1.5
AbFo13	2.1
AbFo13	3.5
AbFo13	2.7
AbFo13	2
AbFo14	2
AbFo14	2.2
AbFo14	2.3
AbFo14	1.8
AbFo21	2.4
AbFo21	2.1
AbFo21	3
AbFo21	2.3
AbFo22	2.4
AbFo22	2.4
AbFo22	2.4
AbFo22	2.9
AbFo23	1.7
AbFo23	2.1
AbFo23	1.7
AbFo23	1.9
AbFo24	2
AbFo24	1.8
AbFo24	2.4
AbFo24	1.7
AbCa11	2.5
AbCa11	3.7
AbCa11	2.9
AbCa11	3.5
AbCa12	3.4
AbCa12	2.2
AbCa12	2.2
AbCa12	3
AbCa13	4.8
AbCa13	4
AbCa13	3.3
AbCa13	3.3
AbCa14	7
AbCa14	2.3
AbCa14	2
AbCa14	2.5
AbCa21	2.7
AbCa21	3
AbCa21	5
AbCa21	2.7
AbCa22	2.6
AbCa22	2.8
AbCa22	4.4
AbCa22	1.9
AbCa23	4.1
AbCa23	4.2
AbCa23	4.6
AbCa23	3
AbCa24	4
AbCa24	4
AbCa24	2.4
AbCa24	3.8
JuAg11	2.2
JuAg11	2
JuAg11	1.6
JuAg11	3.3
JuAg12	2.2
JuAg12	2.2
JuAg12	2
JuAg12	2
JuAg13	1.7
JuAg13	1.9
JuAg13	1.2
JuAg13	2
JuAg14	1.8
JuAg14	3.2
JuAg14	2.3
JuAg14	1.8
JuAg21	2.1
JuAg21	1.7
JuAg21	2
JuAg21	2.1
JuAg22	1.8
JuAg22	2.7
JuAg22	2.5
JuAg22	2.2
JuAg23	1.9
JuAg23	2.7
JuAg23	3.2
JuAg23	2.7
JuAg24	1.8
JuAg24	1.8
JuAg24	2
JuAg24	2.3
JuVa11	2.7
JuVa11	2.6
JuVa11	2
JuVa11	2.9
JuVa12	3
JuVa12	3
JuVa12	2.6
JuVa12	3.2
JuVa13	3.1
JuVa13	2.9
JuVa13	3.2
JuVa13	2.1
JuVa14	3.1
JuVa14	3.1
JuVa14	3.3
JuVa14	2
JuVa21	3.4
JuVa21	3
JuVa21	2.1
JuVa21	2.2
JuVa22	2.4
JuVa22	3.1
JuVa22	1.5
JuVa22	2.1
JuVa23	4
JuVa23	3.6
JuVa23	2.1
JuVa23	4.1
JuVa24	3.1
JuVa24	3.2
JuVa24	2.2
JuVa24	2.6
JuCm11	2
JuCm11	1.2
JuCm11	1.2
JuCm11	1.8
JuCm12	1.9
JuCm12	2.2
JuCm12	2.3
JuCm12	2.5
JuCm13	2
JuCm13	1.9
JuCm13	2.2
JuCm13	1.9
JuCm14	1.8
JuCm14	1.8
JuCm14	2.4
JuCm14	2.3
JuCm21	3.9
JuCm21	2.5
JuCm21	3.2
JuCm21	2
JuCm22	3.5
JuCm22	1.8
JuCm22	2.4
JuCm22	1.6
JuCm23	3.7
JuCm23	2.5
JuCm23	2.8
JuCm23	2.7
JuCm24	4.7
JuCm24	2.4
JuCm24	2.3
JuCm24	3.2
JuMo11	3.1
JuMo11	3.5
JuMo11	3.5
JuMo11	4.1
JuMo12	2.8
JuMo12	4.3
JuMo12	3.1
JuMo12	2.1
JuMo13	3.2
JuMo13	4.1
JuMo13	2.5
JuMo13	4.7
JuMo14	2.5
JuMo14	4.8
JuMo14	2.5
JuMo14	4.2
JuMo21	3.2
JuMo21	2.6
JuMo21	2.3
JuMo21	2.8
JuMo22	2.3
JuMo22	3.1
JuMo22	2.5
JuMo22	3.2
JuMo23	1.7
JuMo23	2.9
JuMo23	3.6
JuMo23	2.4
JuMo24	2.2
JuMo24	2.6
JuMo24	2.9
JuMo24	2.9
JuFo11	2.6
JuFo11	2.2
JuFo11	2.6
JuFo11	1.8
JuFo12	2.2
JuFo12	1.6
JuFo12	2.6
JuFo12	3.1
JuFo13	2.1
JuFo13	1.2
JuFo13	2.1
JuFo13	2.3
JuFo14	1.8
JuFo14	1.1
JuFo14	2.1
JuFo14	2.2
JuFo21	2.2
JuFo21	2.5
JuFo21	1.9
JuFo21	2.6
JuFo22	2.1
JuFo22	2.1
JuFo22	2.1
JuFo22	1.7
JuFo23	1.8
JuFo23	2.1
JuFo23	2.5
JuFo23	2.1
JuFo24	2.7
JuFo24	2.7
JuFo24	2.6
JuFo24	2.4
JuCa11	3.5
JuCa11	3.5
JuCa11	3.3
JuCa11	3
JuCa12	4.3
JuCa12	6.1
JuCa12	4
JuCa12	3.2
JuCa13	3.6
JuCa13	5.5
JuCa13	3.5
JuCa13	3.4
JuCa14	5.9
JuCa14	6.8
JuCa14	6.9
JuCa14	4.2
JuCa21	7
JuCa21	3.6
JuCa21	4
JuCa21	4.3
JuCa22	4
JuCa22	4.6
JuCa22	3.7
JuCa22	5.8
JuCa23	4.8
JuCa23	2.2
JuCa23	9
JuCa23	12.9
JuCa24	4
JuCa24	6.4
JuCa24	10
JuCa24	3.1
SeAg11	4.5
SeAg11	4.3
SeAg11	3.3
SeAg11	2
SeAg12	3.5
SeAg12	5.7
SeAg12	4.9
SeAg12	4.1
SeAg13	2.1
SeAg13	3.2
SeAg13	5
SeAg13	4.4
SeAg14	3.5
SeAg14	4.3
SeAg14	4.3
SeAg14	2.8
SeAg21	2
SeAg21	6.7
SeAg21	2.9
SeAg21	3.5
SeAg22	3.4
SeAg22	3
SeAg22	2.5
SeAg22	3.2
SeAg23	4.9
SeAg23	4.8
SeAg23	3
SeAg23	4.5
SeAg24	2.8
SeAg24	2.5
SeAg24	4.9
SeAg24	2.7
SeVa11	3.4
SeVa11	3.9
SeVa11	3.5
SeVa11	2.9
SeVa12	2.5
SeVa12	3
SeVa12	2.7
SeVa12	5.1
SeVa13	2.7
SeVa13	2.5
SeVa13	2.3
SeVa13	3.3
SeVa14	2.9
SeVa14	3.1
SeVa14	3
SeVa14	1.7
SeVa21	3
SeVa21	2.4
SeVa21	2.1
SeVa21	1.6
SeVa22	1.8
SeVa22	2.3
SeVa22	3.3
SeVa22	2.3
SeVa23	3.8
SeVa23	3.1
SeVa23	4.9
SeVa23	2.5
SeVa24	3.3
SeVa24	2.5
SeVa24	4.5
SeVa24	2.1
SeCm11	3.8
SeCm11	4.8
SeCm11	3.6
SeCm11	3.6
SeCm12	3.6
SeCm12	1.6
SeCm12	2.7
SeCm12	4
SeCm13	2.8
SeCm13	3.1
SeCm13	3.2
SeCm13	2.5
SeCm14	3.2
SeCm14	2.6
SeCm14	4.5
SeCm14	4.2
SeCm21	3.4
SeCm21	2.3
SeCm21	4.1
SeCm21	2.6
SeCm22	3.1
SeCm22	2.5
SeCm22	4
SeCm22	3.2
SeCm23	2.5
SeCm23	2.6
SeCm23	3.7
SeCm23	3.6
SeCm24	5.1
SeCm24	2.4
SeCm24	3.8
SeCm24	2.9
SeMo11	2.4
SeMo11	2.8
SeMo11	3.8
SeMo11	2.7
SeMo12	2.2
SeMo12	3.7
SeMo12	2.9
SeMo12	2.8
SeMo13	2.8
SeMo13	3
SeMo13	1.5
SeMo13	1.2
SeMo14	2.4
SeMo14	2.6
SeMo14	2.6
SeMo14	1.6
SeMo21	2.2
SeMo21	2.4
SeMo21	1.6
SeMo21	1.6
SeMo22	2.9
SeMo22	3.4
SeMo22	3.3
SeMo22	2
SeMo23	2.5
SeMo23	2.7
SeMo23	2.6
SeMo23	3.4
SeMo24	2.4
SeMo24	2.2
SeMo24	4.1
SeMo24	3.2
SeFo11	1.9
SeFo11	1.8
SeFo11	2.5
SeFo11	2.4
SeFo12	2.2
SeFo12	2.5
SeFo12	2.1
SeFo12	2.5
SeFo13	2.1
SeFo13	1.9
SeFo13	1.6
SeFo13	1.2
SeFo14	1.9
SeFo14	1.7
SeFo14	1.7
SeFo14	2.3
SeFo21	1.4
SeFo21	3
SeFo21	3.6
SeFo21	3.7
SeFo22	2.5
SeFo22	2
SeFo22	2.4
SeFo22	3
SeFo23	2.2
SeFo23	2
SeFo23	2.5
SeFo23	2.7
SeFo24	3.4
SeFo24	2.5
SeFo24	2.5
SeFo24	2
SeCa11	4.1
SeCa11	3.9
SeCa11	5.2
SeCa11	5
SeCa12	5
SeCa12	6.7
SeCa12	4.8
SeCa12	3.9
SeCa13	5.8
SeCa13	3.9
SeCa13	2.3
SeCa13	5
SeCa14	2.5
SeCa14	9.9
SeCa14	4.1
SeCa14	5.4
SeCa21	5.1
SeCa21	2.9
SeCa21	3.9
SeCa21	2.1
SeCa22	2.5
SeCa22	2.4
SeCa22	3
SeCa22	1.4
SeCa23	2.2
SeCa23	1.9
SeCa23	1.5
SeCa23	2.8
SeCa24	4.6
SeCa24	1.2
SeCa24	2.5
SeCa24	2.9
OuAg11	1.5
OuAg11	1.5
OuAg11	1.6
OuAg11	1.7
OuAg12	2.5
OuAg12	1.5
OuAg12	2
OuAg12	1.7
OuAg13	2.9
OuAg13	2.7
OuAg13	1.7
OuAg13	3
OuAg14	1.2
OuAg14	2.2
OuAg14	1.9
OuAg14	1.5
OuAg21	3
OuAg21	2.2
OuAg21	2.7
OuAg21	4
OuAg22	3.5
OuAg22	2.8
OuAg22	2.9
OuAg22	4.4
OuAg23	3.7
OuAg23	4.6
OuAg23	2.9
OuAg23	3.5
OuAg24	3.5
OuAg24	4.6
OuAg24	1.5
OuAg24	3
OuVa11	3.1
OuVa11	5.6
OuVa11	3.3
OuVa11	3.8
OuVa12	3.1
OuVa12	2.1
OuVa12	2.9
OuVa12	2.3
OuVa13	3
OuVa13	3
OuVa13	3
OuVa13	3.3
OuVa14	5.5
OuVa14	2.2
OuVa14	4
OuVa14	4.5
OuVa21	1.9
OuVa21	2.8
OuVa21	2.6
OuVa21	3.5
OuVa22	3.1
OuVa22	3
OuVa22	2.7
OuVa22	1.5
OuVa23	3.4
OuVa23	2.3
OuVa23	3
OuVa23	3
OuVa24	3.2
OuVa24	3.8
OuVa24	3
OuVa24	4.5
OuCm11	1.9
OuCm11	3
OuCm11	1.5
OuCm11	1.9
OuCm12	1.7
OuCm12	2.8
OuCm12	2.6
OuCm12	2
OuCm13	2.3
OuCm13	1.8
OuCm13	2.2
OuCm13	2.5
OuCm14	1.8
OuCm14	2.3
OuCm14	2
OuCm14	2.1
OuCm21	2.1
OuCm21	2.5
OuCm21	1.9
OuCm21	2.2
OuCm22	2.8
OuCm22	2.6
OuCm22	3.1
OuCm22	2.5
OuCm23	1.5
OuCm23	1.9
OuCm23	2.5
OuCm23	1.7
OuCm24	1.4
OuCm24	1.7
OuCm24	1.9
OuCm24	1.9
OuMo11	3.3
OuMo11	4
OuMo11	3.5
OuMo11	2.9
OuMo12	3.5
OuMo12	8
OuMo12	3
OuMo12	3
OuMo13	3.5
OuMo13	4.5
OuMo13	3.2
OuMo13	3.9
OuMo14	3.2
OuMo14	4.5
OuMo14	3.5
OuMo14	3.5
OuMo21	2.5
OuMo21	2.8
OuMo21	2.3
OuMo21	3.1
OuMo22	2
OuMo22	2.5
OuMo22	3.7
OuMo22	2
OuMo23	3
OuMo23	3.3
OuMo23	4.3
OuMo23	3.5
OuMo24	3.4
OuMo24	3.3
OuMo24	3.4
OuMo24	4
OuFo11	1.4
OuFo11	1.2
OuFo11	1.7
OuFo11	1.7
OuFo12	1.6
OuFo12	2.6
OuFo12	2.5
OuFo12	2.7
OuFo13	1.5
OuFo13	2
OuFo13	2.8
OuFo13	1.4
OuFo14	2
OuFo14	2.5
OuFo14	3.5
OuFo14	3
OuFo21	2
OuFo21	2.5
OuFo21	3
OuFo21	2.3
OuFo22	2
OuFo22	2.2
OuFo22	2.5
OuFo22	2.3
OuFo23	2.5
OuFo23	2.5
OuFo23	2.6
OuFo23	2.7
OuFo24	2
OuFo24	2.7
OuFo24	2
OuFo24	1.3
OuCa11	3.9
OuCa11	5.4
OuCa11	5.3
OuCa11	6.2
OuCa12	3.3
OuCa12	4.3
OuCa12	6
OuCa12	2.3
OuCa13	4
OuCa13	2.4
OuCa13	3
OuCa13	3.6
OuCa14	2.4
OuCa14	2.7
OuCa14	4.6
OuCa14	4.6
OuCa21	4.1
OuCa21	3.3
OuCa21	5.9
OuCa21	5
OuCa22	4.5
OuCa22	3
OuCa22	5.4
OuCa22	3.1
OuCa23	2.3
OuCa23	2.5
OuCa23	4.5
OuCa23	1
OuCa24	3.7
OuCa24	3.5
OuCa24	3
OuCa24	3
DezAg11	3
DezAg11	2.5
DezAg11	2.8
DezAg11	2.3
DezAg12	2.3
DezAg12	3.5
DezAg12	2.6
DezAg12	2
DezAg13	2.4
DezAg13	2.8
DezAg13	2.4
DezAg13	3.2
DezAg14	2.4
DezAg14	2.1
DezAg14	1.2
DezAg14	3.5
DezAg21	2.2
DezAg21	3.2
DezAg21	3.5
DezAg21	5.5
DezAg22	2.4
DezAg22	2
DezAg22	2.9
DezAg22	2.5
DezAg23	3.9
DezAg23	2.5
DezAg23	3
DezAg23	3.8
DezAg24	3.8
DezAg24	2.4
DezAg24	2.8
DezAg24	1.5
DezVa11	2.3
DezVa11	3
DezVa11	1.6
DezVa11	3.2
DezVa12	2.7
DezVa12	2.5
DezVa12	1.8
DezVa12	1.6
DezVa13	2.1
DezVa13	1.9
DezVa13	2.2
DezVa13	2.2
DezVa14	3.4
DezVa14	5.4
DezVa14	2.5
DezVa14	2.4
DezVa21	3
DezVa21	2.6
DezVa21	2
DezVa21	3.6
DezVa22	2.1
DezVa22	2.9
DezVa22	2.3
DezVa22	3.3
DezVa23	1.8
DezVa23	1.9
DezVa23	1.8
DezVa23	1.6
DezVa24	2.5
DezVa24	3
DezVa24	4.7
DezVa24	2
DezCm11	1.7
DezCm11	2.8
DezCm11	1.7
DezCm11	1.6
DezCm12	2.8
DezCm12	2.5
DezCm12	2.5
DezCm12	1.9
DezCm13	1.7
DezCm13	3.1
DezCm13	1.7
DezCm13	2
DezCm14	2
DezCm14	2.4
DezCm14	2.4
DezCm14	2.1
DezCm21	1.3
DezCm21	2.1
DezCm21	2
DezCm21	2
DezCm22	1.8
DezCm22	2.6
DezCm22	1
DezCm22	3.4
DezCm23	2.1
DezCm23	1.9
DezCm23	2
DezCm23	2.1
DezCm24	1.6
DezCm24	2.5
DezCm24	3.3
DezCm24	2.2
DezMo11	2
DezMo11	2.1
DezMo11	2.2
DezMo11	2.7
DezMo12	2
DezMo12	2.2
DezMo12	2.2
DezMo12	1.5
DezMo13	2
DezMo13	1.9
DezMo13	2.8
DezMo13	2.6
DezMo14	2
DezMo14	1.9
DezMo14	1.5
DezMo14	2.4
DezMo21	2.6
DezMo21	3.1
DezMo21	2.1
DezMo21	2.1
DezMo22	2.1
DezMo22	3.3
DezMo22	2
DezMo22	2.1
DezMo23	3.2
DezMo23	2.8
DezMo23	1.7
DezMo23	3
DezMo24	4.2
DezMo24	2.1
DezMo24	2.5
DezMo24	2.8
DezFo11	1.4
DezFo11	1.6
DezFo11	2.3
DezFo11	1.7
DezFo12	2.3
DezFo12	2
DezFo12	1.8
DezFo12	2.6
DezFo13	2.6
DezFo13	3.3
DezFo13	2.7
DezFo13	2.9
DezFo14	1.9
DezFo14	2.9
DezFo14	2.7
DezFo14	2.4
DezFo21	1.8
DezFo21	2.6
DezFo21	2
DezFo21	1.7
DezFo22	2.5
DezFo22	3
DezFo22	3.9
DezFo22	1.9
DezFo23	2.3
DezFo23	2.7
DezFo23	1.8
DezFo23	2.5
DezFo24	2.3
DezFo24	2.4
DezFo24	4
DezFo24	1.7
DezCa11	1.5
DezCa11	1.4
DezCa11	1.7
DezCa11	2
DezCa12	2
DezCa12	1.5
DezCa12	2.1
DezCa12	3.4
DezCa13	2
DezCa13	1.5
DezCa13	1.5
DezCa13	2.1
DezCa14	4.5
DezCa14	1.6
DezCa14	2.2
DezCa14	1.8
DezCa21	3.3
DezCa21	3.2
DezCa21	6
DezCa21	2.6
DezCa22	1.5
DezCa22	5.8
DezCa22	2.6
DezCa22	3.8
DezCa23	3
DezCa23	3.2
DezCa23	3.3
DezCa23	3.9
DezCa24	4
DezCa24	3.9
DezCa24	4.6
DezCa24	2.6

## Sheet: Code Legend
Ja - January	Ag - Aguda	1- shore	1-site
Ab - April	Va - Valadares
Ju - July	Cm - Cabo do Mundo
Se - September	Mo - Moledo
Ou - October	Ca - Carreço
Dez - December	Fo - Forte do Cão
For example:	JaAg11 : sample in January, in Aguda, site 1, replica 1
	JaAg12: sample in January, in Aguda, site 1, replica 2
	OuCm23: sample in October, in Cabo do Mundo, site 2, replica 3
